# Supplementary material
Source: PubMed Central journal article supplement (PMC3135806)
Supplement: mmc1.pdf [file mmc1.pdf]

**The American Journal of Human Genetics, Volume 89**

**Supplemental Data**

**Recent Admixture in an Indian Population**

**of African Ancestry**

**Ankita Narang, Pankaj Jha, Vimal Rawat, Arijit Mukhopadhyay, Debasis Dash, Indian Genome Variation, Analabha Basu, and Mitali Mukerji**

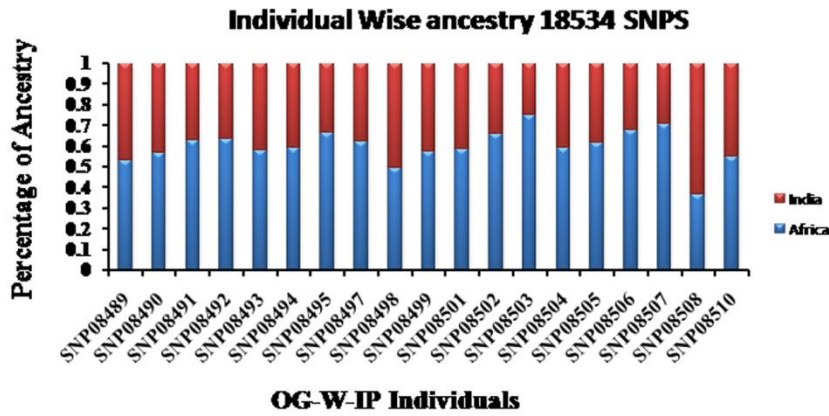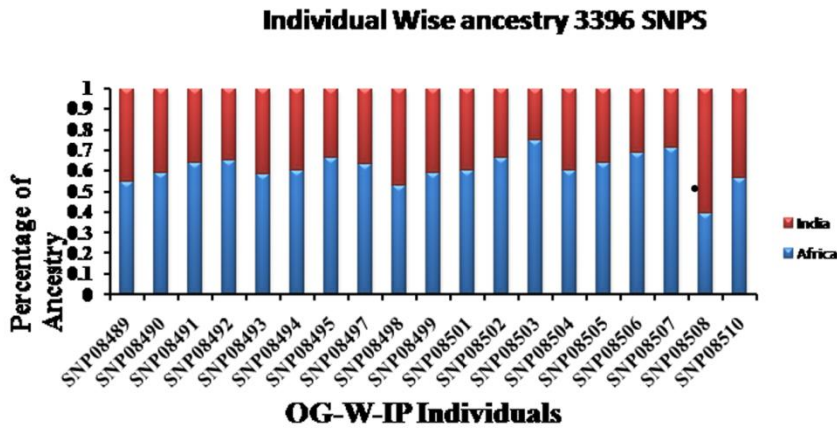

Figure S1: The amount of Individual ancestries (Red is IE ancestry Blue is African ancestry) among the 19 OG individuals as estimated by STRUCTURE using all 18534 SNPs [top block] compared to the same using 3396 [bottom block] SNPs.

a

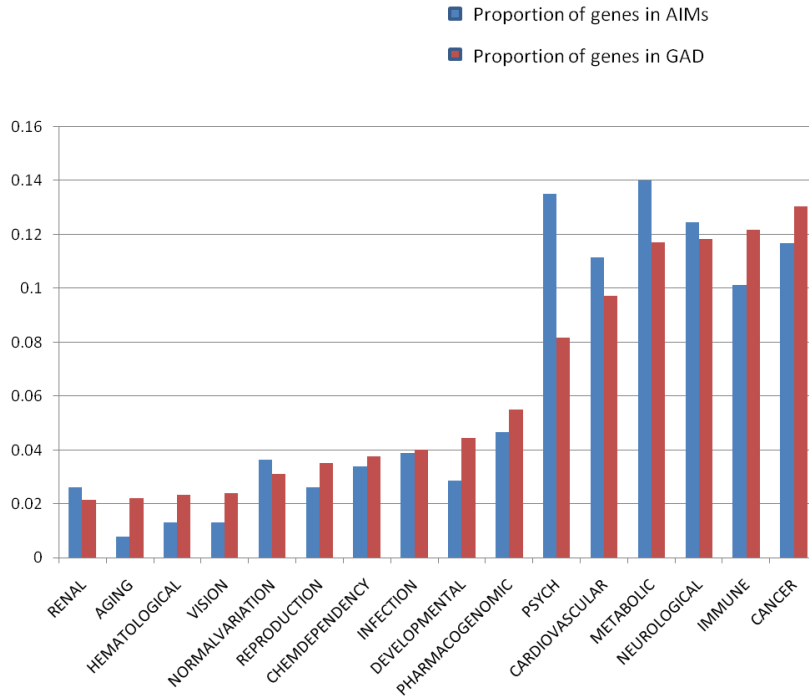

b

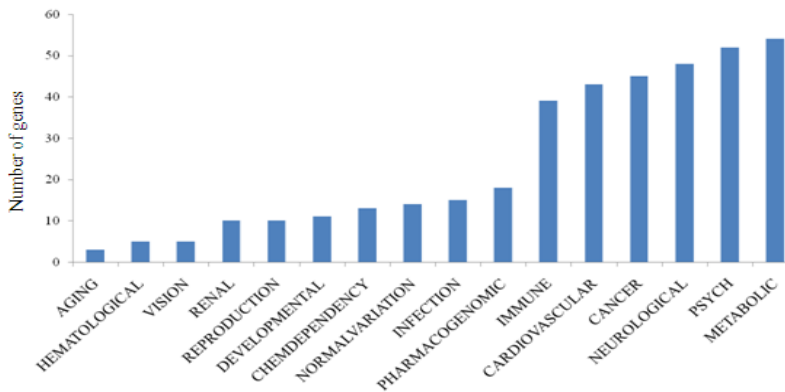

Figure S2: Representation of (a) Proportion of genes from AIMs compared to total proportion of genes in GAD (b) the number of genes (from 3396 AIMs) with  $F_{ST} > 0.1$  between the African and the Indian ancestral populations with respect to reported association with different diseases in Genetic Association Database (GAD)



**TableS1: Details of the populations analysed in the current study**

| <b>SN</b> | <b>Population code</b> | <b>Caste/religious</b> | <b>Linguistic group</b> | <b>Geography</b> | <b>Ethnicity</b>    |
|-----------|------------------------|------------------------|-------------------------|------------------|---------------------|
| 1         | AA-C-IP5               | Tribe                  | Austro-Asiatic          | Central          | Isolated population |
| 2         | AA-NE-IP1              | Tribe                  | Austro-Asiatic          | North-East       | Isolated population |
| 3         | DR-C-IP2               | Tribe                  | Dravidian               | Central          | Isolated population |
| 4         | DR-S-LP3               | Caste                  | Dravidian               | South            | Large population    |
| 5         | IE-E-LP2               | Caste                  | Indo-European           | East             | Large population    |
| 6         | IE-E-LP4               | Caste                  | Indo-European           | East             | Large population    |
| 7         | IE-NE-IP1              | Tribe                  | Indo-European           | North-East       | Isolated population |
| 8         | IE-NE-LP1              | Caste                  | Indo-European           | North-East       | Large population    |
| 9         | IE-N-IP2               | Tribe                  | Indo-European           | North            | Isolated population |
| 10        | IE-N-LP1               | Caste                  | Indo-European           | North            | Large population    |
| 11        | IE-N-LP10              | Caste                  | Indo-European           | North            | Large population    |
| 12        | IE-N-LP5               | Caste                  | Indo-European           | North            | Large population    |
| 13        | IE-N-LP9               | Caste                  | Indo-European           | North            | Large population    |
| 14        | IE-N-SP4               | Religious              | Indo-European           | North            | Special population  |
| 15        | IE-W-LP1               | Caste                  | Indo-European           | West             | Large population    |
| 16        | IE-W-LP2               | Caste                  | Indo-European           | West             | Large population    |
| 17        | IE-W-LP3               | Caste                  | Indo-European           | West             | Large population    |
| 18        | IE-W-LP4               | Caste                  | Indo-European           | West             | Large population    |
| 19        | OG-W-IP                | Out-group              | Out-group               | West             | Isolated population |
| 20        | TB-NE-LP1              | Caste                  | Tibeto-Burman           | North-East       | Large population    |
| 21        | TB-N-IP1               | Tribe                  | Tibeto-Burman           | North            | Isolated population |
| 22        | TB-N-SP1               | Religious              | Tibeto-Burman           | North            | Special population  |
| 23        | DR-S-LP                | Caste                  | Dravidian               | South            | Large population    |
| 24        | IE-E-IP1               | Tribe                  | Indo-European           | East             | Isolated population |
| 25        | IE-N-LP18              | Caste                  | Indo-European           | North            | Large population    |
| 26        | IE-W-IP3               | Tribe                  | Indo-European           | West             | Isolated population |

**Table S2: Details of the 3396 AIMs that have  $F_{ST} \geq 0.1$  between African and Indo-European ancestral populations**

| Chromosome | SNP        | Allele1 | Allele2 | MAF_Africa | MAF_IN D | MAF_O G | Gene      |
|------------|------------|---------|---------|------------|----------|---------|-----------|
| 1          | rs10489409 | C       | T       | 0.1406     | 0.2      | 0.02632 | PLA2G4A   |
| 1          | rs1304352  | C       | A       | 0.4531     | 0.09302  | 0.1579  | CHRM3     |
| 1          | rs2856813  | T       | C       | 0.1562     | 0.6047   | 0.1842  | NGF       |
| 1          | rs10492961 | T       | C       | 0.2031     | 0.6471   | 0.3158  | CAMTA1    |
| 1          | rs952635   | C       | T       | 0.2188     | 0.625    | 0.3235  | PDE4B     |
| 1          | rs96501    | C       | T       | 0.5625     | 0.1744   | 0.4474  | NTNG1     |
| 1          | rs10494061 | C       | T       | 0.07812    | 0.475    | 0.3158  | NTNG1     |
| 1          | rs2032563  | A       | G       | 0          | 0.314    | 0.1579  | CAMTA1    |
| 1          | rs594165   | A       | C       | 0.4219     | 0.1313   | 0.1471  | NTNG1     |
| 1          | rs6426905  | T       | C       | 0.4531     | 0.1105   | 0.1316  | KCNN3     |
| 1          | rs6664987  | T       | C       | 0.4375     | 0.1012   | 0.2105  | CAMTA1    |
| 1          | rs228651   | T       | C       | 0.07812    | 0.4593   | 0.2632  | UTS2      |
| 1          | rs696619   | A       | G       | 0.1406     | 0.4942   | 0.2895  | F3        |
| 1          | rs10494436 | G       | A       | 0.03125    | 0.4767   | 0.2368  | LMX1A     |
| 1          | rs1200150  | A       | C       | 0.4062     | 0.7235   | 0.3421  | ATP1B1    |
| 1          | rs528455   | T       | C       | 0.4839     | 0.7635   | 0.4375  | DPYD      |
| 1          | rs970337   | A       | G       | 0.2188     | 0.5972   | 0.25    | DPYD      |
| 1          | rs2618717  | T       | C       | 0.2969     | 0.6744   | 0.3421  | RYR2      |
| 1          | rs790900   | A       | C       | 0.4219     | 0.1548   | 0.4474  | RYR2      |
| 1          | rs10489267 | T       | G       | 0.2812     | 0.05195  | 0.02941 | TNFSF4    |
| 1          | rs1009806  | C       | T       | 0.1094     | 0.3393   | 0.2105  | UBR4      |
| 1          | rs1022013  | G       | A       | 0.4219     | 0.1071   | 0.3421  | Non-genic |
| 1          | rs10489161 | A       | G       | 0.6094     | 0.2765   | 0.4474  | Non-genic |
| 1          | rs10489211 | G       | A       | 0.4688     | 0.07558  | 0.4474  | Non-genic |
| 1          | rs10489216 | A       | G       | 0          | 0.2733   | 0.1053  | Non-genic |
| 1          | rs10489227 | A       | G       | 0.2188     | 0.6446   | 0.3947  | Non-genic |
| 1          | rs10489321 | C       | T       | 0.125      | 0.5058   | 0.2368  | TNR       |
| 1          | rs10489430 | C       | T       | 0          | 0.3512   | 0.1053  | ZMPSTE24  |
| 1          | rs1048947  | C       | T       | 0.5        | 0.7907   | 0.3947  | PAPPA2    |

|   |                |   |   |         |         |         |           |
|---|----------------|---|---|---------|---------|---------|-----------|
|   | 7              |   |   |         |         |         |           |
| 1 | rs1048957<br>3 | T | C | 0.01562 | 0.256   | 0.1053  | IGSF21    |
| 1 | rs1048960<br>3 | A | G | 0       | 0.4186  | 0.1842  | Non-genic |
| 1 | rs1048972<br>9 | T | C | 0.4375  | 0.1337  | 0.4211  | C1orf21   |
| 1 | rs1048975<br>9 | T | C | 0.6406  | 0.07237 | 0.3611  | Non-genic |
| 1 | rs1049299<br>8 | T | C | 0.07812 | 0.2938  | 0.1053  | CAPZB     |
| 1 | rs1049301<br>5 | G | A | 0.04688 | 0.4588  | 0.1579  | ZBTB40    |
| 1 | rs1049355<br>0 | A | G | 0       | 0.3049  | 0.08333 | Non-genic |
| 1 | rs1049357<br>8 | C | T | 0.03125 | 0.4529  | 0.2105  | Non-genic |
| 1 | rs1049365<br>0 | T | C | 0.4844  | 0.1709  | 0.3684  | Non-genic |
| 1 | rs1049375<br>6 | T | C | 0.03125 | 0.2941  | 0.1053  | LPAR3     |
| 1 | rs1049376<br>1 | C | A | 0.2188  | 0.741   | 0.4211  | Non-genic |
| 1 | rs1049376<br>8 | G | A | 0.25    | 0.6765  | 0.3684  | Non-genic |
| 1 | rs1049383<br>5 | T | C | 0.375   | 0.06548 | 0.3158  | Non-genic |
| 1 | rs1049396<br>3 | C | T | 0.07812 | 0.4589  | 0.25    | Non-genic |
| 1 | rs1049408<br>7 | G | A | 0.09375 | 0.6845  | 0.2632  | Non-genic |
| 1 | rs1049417<br>8 | G | A | 0.09375 | 0.3571  | 0.1316  | Non-genic |
| 1 | rs1049419<br>2 | C | T | 0       | 0.3529  | 0.07895 | CD101     |
| 1 | rs1049420<br>1 | A | G | 0.01562 | 0.2917  | 0.07895 | Non-genic |
| 1 | rs1049422<br>6 | A | G | 0.2419  | 0.02326 | 0.1842  | Non-genic |
| 1 | rs1049425<br>7 | C | T | 0.4531  | 0.05952 | 0.2632  | Non-genic |
| 1 | rs1049431<br>6 | A | G | 0.3594  | 0.7294  | 0.3333  | FCRL5     |
| 1 | rs1049438<br>7 | T | C | 0.2656  | 0.5864  | 0.25    | Non-genic |
| 1 | rs1049438<br>8 | A | C | 0.07812 | 0.3176  | 0.05263 | Non-genic |
| 1 | rs1049441<br>0 | T | C | 0.0625  | 0.1337  | 0       | Non-genic |
| 1 | rs1049513<br>3 | T | G | 0.25    | 0.7059  | 0.4706  | Non-genic |
| 1 | rs1049543<br>4 | T | G | 0.2656  | 0.04217 | 0.25    | Non-genic |
| 1 | rs1049544<br>9 | G | A | 0.6719  | 0.2674  | 0.4737  | Non-genic |

|   |                |   |   |         |         |         |           |
|---|----------------|---|---|---------|---------|---------|-----------|
| 1 | rs1049545<br>9 | A | G | 0.25    | 0.5976  | 0.3684  | FMN2      |
| 1 | rs1076624      | T | C | 0.4531  | 0.1548  | 0.4211  | Non-genic |
| 1 | rs1080307      | G | T | 0.01562 | 0.3706  | 0.1579  | MAGI3     |
| 1 | rs1090834<br>8 | G | A | 0.1719  | 0.8256  | 0.3947  | Non-genic |
| 1 | rs1110304      | A | G | 0.4219  | 0.7647  | 0.5     | NUAK2     |
| 1 | rs1110423      | G | A | 0.5     | 0.2313  | 0.4737  | ERO1LB    |
| 1 | rs1146635      | A | G | 0.03125 | 0.5765  | 0.2368  | RABGGTB   |
| 1 | rs1181876      | A | G | 0.03125 | 0.3512  | 0.1579  | CCDC27    |
| 1 | rs1244981      | A | G | 0.3594  | 0.7529  | 0.4737  | Non-genic |
| 1 | rs1279688      | T | C | 0.2344  | 0.6548  | 0.4167  | Non-genic |
| 1 | rs1298129      | G | A | 0.1406  | 0.5964  | 0.3158  | Non-genic |
| 1 | rs1317712      | T | C | 0.01562 | 0.4765  | 0       | Non-genic |
| 1 | rs1327896      | G | T | 0.2031  | 0.6867  | 0.2368  | Non-genic |
| 1 | rs1330224      | A | G | 0.2656  | 0.6337  | 0.3684  | NMNAT2    |
| 1 | rs1338685      | T | C | 0.6094  | 0.8647  | 0.5     | Non-genic |
| 1 | rs1361493      | C | T | 0.2656  | 0.675   | 0.4474  | LRRC7     |
| 1 | rs1389742      | G | A | 0.2344  | 0.5412  | 0.2105  | MOSC1     |
| 1 | rs1392096      | G | A | 0.25    | 0.6463  | 0.3158  | Non-genic |
| 1 | rs1395455      | G | A | 0.1406  | 0.5294  | 0.2632  | Non-genic |
| 1 | rs1409803      | A | G | 0.5781  | 0.1786  | 0.4167  | GLT25D2   |
| 1 | rs1409808      | G | A | 0.4844  | 0.119   | 0.3056  | Non-genic |
| 1 | rs1414411      | T | C | 0.2656  | 0.657   | 0.3947  | Non-genic |
| 1 | rs1414674      | C | T | 0       | 0.4524  | 0.1667  | Non-genic |
| 1 | rs1416467      | A | G | 0.3125  | 0.4568  | 0.3684  | Non-genic |
| 1 | rs1418425      | C | T | 0.3438  | 0.657   | 0.2895  | Non-genic |
| 1 | rs1432120      | C | T | 0.2656  | 0.0407  | 0.3947  | Non-genic |
| 1 | rs1434889      | A | G | 0.2969  | 0.6488  | 0.3158  | Non-genic |
| 1 | rs1473711      | A | G | 0.3906  | 0.157   | 0.5     | Non-genic |
| 1 | rs1482658      | G | T | 0.03125 | 0.3487  | 0.1316  | Non-genic |
| 1 | rs1567190      | C | T | 0.1719  | 0.5824  | 0.2368  | CR2       |
| 1 | rs1633149      | G | A | 0.2812  | 0.6512  | 0.3421  | Non-genic |
| 1 | rs1704745      | G | A | 0.03125 | 0.7012  | 0.25    | DDR2      |
| 1 | rs170827       | T | G | 0       | 0.2927  | 0.08333 | Non-genic |
| 1 | rs1775700      | C | T | 0.1719  | 0.8372  | 0.2368  | MAB21L3   |
| 1 | rs1775752      | T | C | 0.4219  | 0.1265  | 0.3421  | Non-genic |
| 1 | rs1807871      | C | T | 0.5938  | 0.08721 | 0.3421  | Non-genic |
| 1 | rs1898152      | T | C | 0       | 0.07558 | 0       | PLD5      |
| 1 | rs1912231      | C | T | 0.07812 | 0.3487  | 0.06667 | Non-genic |
| 1 | rs1922924      | T | C | 0.0625  | 0.4405  | 0.1053  | Non-genic |
| 1 | rs1930293      | C | T | 0.3281  | 0.08442 | 0.2222  | Non-genic |
| 1 | rs1933162      | T | C | 0.7344  | 0.1037  | 0.4737  | OR2L13    |
| 1 | rs2012130      | C | T | 0.3906  | 0.657   | 0.2368  | Non-genic |
| 1 | rs2050187      | T | C | 0.1719  | 0.4935  | 0.3056  | HHAT      |
| 1 | rs2076655      | A | G | 0.0625  | 0.5756  | 0.2632  | MTOR      |
| 1 | rs2201689      | G | A | 0       | 0.5059  | 0.2105  | Non-genic |
| 1 | rs2224402      | G | A | 0.1094  | 0.6221  | 0.3421  | Non-genic |
| 1 | rs2224909      | A | G | 0.4844  | 0.7711  | 0.3421  | Non-genic |



|   |           |   |   |         |         |         |           |
|---|-----------|---|---|---------|---------|---------|-----------|
| 1 | rs223192  | C | T | 0.5     | 0.122   | 0.3947  | IGSF21    |
| 1 | rs228563  | C | A | 0.3125  | 0.6974  | 0.4375  | Non-genic |
| 1 | rs2295942 | T | C | 0.125   | 0.6852  | 0.2368  | GNG12     |
| 1 | rs2335230 | C | A | 0.04688 | 0.3647  | 0.1316  | ADAR      |
| 1 | rs2355230 | C | A | 0.01562 | 0.3529  | 0.05263 | Non-genic |
| 1 | rs2363965 | T | C | 0.25    | 0.6706  | 0.2778  | KDM5B     |
| 1 | rs2375675 | A | C | 0.5     | 0.7907  | 0.5     | Non-genic |
| 1 | rs2378282 | G | A | 0.4844  | 0.1     | 0.3421  | Non-genic |
| 1 | rs240101  | G | A | 0.2656  | 0.6221  | 0.4211  | PAPPA2    |
| 1 | rs2432    | T | C | 0.1406  | 0.5174  | 0.2632  | SYT6      |
| 1 | rs2504057 | A | G | 0.2812  | 0.5     | 0.1579  | Non-genic |
| 1 | rs259659  | T | C | 0       | 0.2988  | 0.1316  | Non-genic |
| 1 | rs270703  | C | T | 0.09375 | 0.4176  | 0.1389  | RNF220    |
| 1 | rs2745492 | A | G | 0.5781  | 0.2229  | 0.4211  | Non-genic |
| 1 | rs2764664 | T | C | 0.1406  | 0.5904  | 0.1765  | DAB1      |
| 1 | rs2777965 | A | C | 0.125   | 0.6706  | 0.2632  | FCRL4     |
| 1 | rs2788271 | G | T | 0.1406  | 0.7805  | 0.3824  | Non-genic |
| 1 | rs2789417 | T | G | 0.3906  | 0.08235 | 0.3421  | SLAMF9    |
| 1 | rs2816999 | C | T | 0.2344  | 0.5123  | 0.3056  | NR5A2     |
| 1 | rs3124089 | G | A | 0.2031  | 0.6566  | 0.4211  | CNST      |
| 1 | rs3766377 | A | G | 0.5156  | 0.7619  | 0.4474  | CD244     |
| 1 | rs3766642 | A | G | 0.5     | 0.06977 | 0.4737  | RALGPS2   |
| 1 | rs3845572 | T | C | 0.4062  | 0.09302 | 0.2895  | Non-genic |
| 1 | rs3862265 | T | C | 0.1562  | 0.5125  | 0.2647  | Non-genic |
| 1 | rs3898486 | T | C | 0.3594  | 0.8512  | 0.4706  | AXDND1    |
| 1 | rs4131568 | T | C | 0.03125 | 0.284   | 0.05882 | Non-genic |
| 1 | rs4304570 | G | A | 0.01562 | 0.2209  | 0.02632 | GPR137B   |
| 1 | rs432611  | C | A | 0.375   | 0.06471 | 0.3158  | Non-genic |
| 1 | rs4433402 | G | A | 0.4844  | 0.1105  | 0.3235  | Non-genic |
| 1 | rs4652621 | G | A | 0.6875  | 0.8235  | 0.4211  | Non-genic |
| 1 | rs4652921 | A | G | 0.5     | 0.1667  | 0.3684  | Non-genic |
| 1 | rs4658186 | A | G | 0.0625  | 0.4412  | 0.1842  | Non-genic |
| 1 | rs4659339 | C | A | 0.125   | 0.5301  | 0.2778  | Non-genic |
| 1 | rs4907140 | C | T | 0.1406  | 0.3895  | 0.07895 | SYDE2     |
| 1 | rs581595  | C | A | 0.03125 | 0.2857  | 0.1053  | Non-genic |
| 1 | rs633343  | C | T | 0.4062  | 0.5833  | 0.2368  | Non-genic |
| 1 | rs6424950 | C | T | 0.5156  | 0.122   | 0.4211  | C1orf21   |
| 1 | rs6425357 | T | C | 0.25    | 0.9157  | 0.5     | Non-genic |
| 1 | rs6537803 | G | A | 0.3438  | 0.75    | 0.4737  | Non-genic |
| 1 | rs6577231 | C | T | 0.4219  | 0.03571 | 0.4333  | Non-genic |
| 1 | rs665062  | G | A | 0.6094  | 0.2471  | 0.4474  | Non-genic |
| 1 | rs6657722 | T | C | 0.1562  | 0.6687  | 0.2353  | Non-genic |
| 1 | rs6672844 | A | G | 0.6562  | 0.1506  | 0.4474  | Non-genic |
| 1 | rs6681578 | C | T | 0.01562 | 0.6325  | 0.2632  | CACHD1    |
| 1 | rs6691591 | G | A | 0.2031  | 0.5176  | 0.2632  | KANK4     |
| 1 | rs6701631 | T | C | 0.5     | 0.1235  | 0.3421  | SYT14     |
| 1 | rs696620  | G | A | 0.1562  | 0.6607  | 0.2368  | SLC44A3   |
| 1 | rs709184  | A | G | 0       | 0.2235  | 0       | Non-genic |

|   |                |   |   |         |         |         |                |
|---|----------------|---|---|---------|---------|---------|----------------|
| 1 | rs716756       | A | G | 0       | 0.3537  | 0.1053  | HMCN1          |
| 1 | rs716988       | T | G | 0       | 0.3765  | 0.1316  | Non-genic      |
| 1 | rs724685       | G | A | 0.5625  | 0.1294  | 0.3947  | Non-genic      |
| 1 | rs7367176      | A | G | 0.03125 | 0.3488  | 0.1053  | Non-genic      |
| 1 | rs7415961      | C | T | 0.6875  | 0.1221  | 0.4211  | C1orf21        |
| 1 | rs7526653      | T | C | 0.04688 | 0.3059  | 0.1053  | DNM3           |
| 1 | rs752819       | A | G | 0.3906  | 0.09639 | 0.2895  | ST6GALNAC<br>3 |
| 1 | rs7553933      | C | T | 0.4531  | 0.06395 | 0.2895  | AHCYL1         |
| 1 | rs7556318      | A | G | 0.25    | 0.6566  | 0.3889  | Non-genic      |
| 1 | rs764051       | G | A | 0.2812  | 0.6875  | 0.3929  | -              |
| 1 | rs765224       | A | G | 0.3281  | 0.09259 | 0.4211  | Non-genic      |
| 1 | rs784828       | A | G | 0.3906  | 0.1047  | 0.2632  | Non-genic      |
| 1 | rs798007       | C | T | 0.5625  | 0.04819 | 0.4211  | Non-genic      |
| 1 | rs817413       | T | G | 0.4688  | 0.03529 | 0.3158  | SYDE2          |
| 1 | rs856084       | G | T | 0.01562 | 0.3155  | 0.1316  | PYHIN1         |
| 1 | rs856613       | A | G | 0.5312  | 0.04651 | 0.3158  | NRD1           |
| 1 | rs871343       | G | A | 0.1562  | 0.6071  | 0.2895  | HIVEP3         |
| 1 | rs875326       | T | C | 0.5938  | 0.1447  | 0.4444  | Non-genic      |
| 1 | rs908929       | G | A | 0.375   | 0.09412 | 0.2632  | Non-genic      |
| 1 | rs951781       | T | C | 0       | 0.3488  | 0.1579  | NES            |
| 1 | rs953194       | T | C | 0.0625  | 0.2442  | 0       | Non-genic      |
| 1 | rs953809       | A | G | 0.2812  | 0.06395 | 0.2632  | CD247          |
| 1 | rs955613       | T | C | 0.09375 | 0.5756  | 0.3158  | Non-genic      |
| 1 | rs965972       | G | A | 0.4062  | 0.04706 | 0.2895  | Non-genic      |
| 1 | rs966102       | A | G | 0.04688 | 0.3372  | 0.1316  | Non-genic      |
| 1 | rs984779       | C | T | 0.2812  | 0.6358  | 0.3889  | Non-genic      |
| 1 | rs1007271      | G | A | 0.09375 | 0.6686  | 0.5     | Non-genic      |
| 1 | rs1018626      | G | A | 0.3594  | 0.1     | 0.02632 | Non-genic      |
| 1 | rs1048919<br>3 | G | A | 0.3906  | 0.07831 | 0.1053  | RCSD1          |
| 1 | rs1048953<br>4 | T | G | 0.2812  | 0.02941 | 0.07895 | TRIT1          |
| 1 | rs1049306<br>7 | A | G | 0.7031  | 0.1294  | 0.2895  | SFPQ           |
| 1 | rs1049320<br>1 | G | T | 0.3906  | 0.07738 | 0.05556 | Non-genic      |
| 1 | rs1049321<br>4 | A | G | 0       | 0.2432  | 0.1471  | DAB1           |
| 1 | rs1049331<br>0 | T | C | 0.01562 | 0.3314  | 0.2368  | Non-genic      |
| 1 | rs1049375<br>4 | G | A | 0.5781  | 0.1353  | 0.3158  | SPATA1         |
| 1 | rs1049375<br>8 | C | T | 0.2188  | 0.5765  | 0.4474  | Non-genic      |
| 1 | rs1049418<br>0 | G | A | 0.7031  | 0.3314  | 0.2632  | CASQ2          |
| 1 | rs1049438<br>3 | A | G | 0.3594  | 0.05625 | 0.1316  | Non-genic      |
| 1 | rs1049451<br>9 | T | C | 0.2188  | 0.0407  | 0.1176  | AXDND1         |

|   |                |   |   |         |         |        |           |
|---|----------------|---|---|---------|---------|--------|-----------|
| 1 | rs1049454<br>8 | G | A | 0.3438  | 0.04651 | 0.1842 | Non-genic |
| 1 | rs1049459<br>5 | C | A | 0.4062  | 0.1111  | 0.1316 | Non-genic |
| 1 | rs1049474<br>3 | A | G | 0.8125  | 0.391   | 0.4333 | KCNT2     |
| 1 | rs1049496<br>8 | C | T | 0.6562  | 0.2209  | 0.3421 | Non-genic |
| 1 | rs1049523<br>4 | A | G | 0.07812 | 0.3855  | 0.3611 | Non-genic |
| 1 | rs1113239      | G | A | 0.2031  | 0.6456  | 0.4375 | Non-genic |
| 1 | rs1134647      | G | A | 0       | 0.256   | 0.1316 | SMYD2     |
| 1 | rs1166866      | C | T | 0.6719  | 0.0814  | 0.2895 | Non-genic |
| 1 | rs1166868      | T | C | 0.8125  | 0.225   | 0.4474 | Non-genic |
| 1 | rs1175119      | A | C | 0.6719  | 0.1524  | 0.3158 | Non-genic |
| 1 | rs1192832      | T | C | 0.04688 | 0.3314  | 0.2368 | Non-genic |
| 1 | rs1194596      | G | A | 0.7812  | 0.3081  | 0.4211 | UBAP2L    |
| 1 | rs1260817      | T | G | 0.6094  | 0.2037  | 0.3421 | ROR1      |
| 1 | rs1321996      | G | A | 0.04688 | 0.6951  | 0.4167 | Non-genic |
| 1 | rs1340416      | A | G | 0.8281  | 0.1286  | 0.25   | Non-genic |
| 1 | rs1341015      | G | A | 0.4219  | 0.1176  | 0.2632 | Non-genic |
| 1 | rs1360181      | C | T | 0.5625  | 0.3471  | 0.3684 | Non-genic |
| 1 | rs1385152      | G | T | 0.3438  | 0.08434 | 0.1842 | AGBL4     |
| 1 | rs1404027      | G | A | 0.5781  | 0.2125  | 0.3438 | Non-genic |
| 1 | rs1407555      | T | C | 0.07812 | 0.3895  | 0.3421 | TRMT1L    |
| 1 | rs1407709      | T | C | 0.5     | 0.125   | 0.2632 | Non-genic |
| 1 | rs1408954      | G | A | 0.7344  | 0.2975  | 0.4412 | Non-genic |
| 1 | rs1409809      | G | A | 0.04688 | 0.436   | 0.2895 | Non-genic |
| 1 | rs1409810      | A | G | 0.4688  | 0.1279  | 0.2368 | Non-genic |
| 1 | rs1419114      | A | G | 0.4531  | 0.1221  | 0.2105 | ATP2B4    |
| 1 | rs1458597      | C | T | 0.4062  | 0.06977 | 0.1316 | SLC35F3   |
| 1 | rs1505553      | A | G | 0.4531  | 0.1456  | 0.1471 | Non-genic |
| 1 | rs1541252      | T | C | 0.4531  | 0.1221  | 0.2105 | ATP2B4    |
| 1 | rs1710776      | C | T | 0.03125 | 0.343   | 0.2368 | Non-genic |
| 1 | rs1721525      | T | C | 0.07812 | 0.4884  | 0.2941 | Non-genic |
| 1 | rs1930211      | G | A | 0.04688 | 0.4198  | 0.2368 | Non-genic |
| 1 | rs2050632      | C | T | 0.7031  | 0.3193  | 0.3421 | EFCAB2    |
| 1 | rs2121053      | C | A | 0.03125 | 0.4588  | 0.2895 | Non-genic |
| 1 | rs2209096      | C | T | 0.04688 | 0.2973  | 0.2778 | DNM3      |
| 1 | rs2211127      | C | T | 0       | 0.4518  | 0.2333 | Non-genic |
| 1 | rs2298028      | T | C | 0.2188  | 0.3882  | 0.3421 | HAO2      |
| 1 | rs2300564      | C | T | 0.8281  | 0.4753  | 0.3158 | Non-genic |
| 1 | rs233053       | G | A | 0.75    | 0.5     | 0.3667 | DDAH1     |
| 1 | rs2383532      | T | C | 0.1562  | 0.03125 | 0      | Non-genic |
| 1 | rs2869513      | G | A | 0       | 0.5     | 0.3947 | EPHB2     |
| 1 | rs2902467      | G | T | 0.625   | 0.2152  | 0.4167 | ADCY10    |
| 1 | rs3131735      | A | G | 0.8125  | 0.3193  | 0.4722 | DAB1      |
| 1 | rs342818       | C | T | 0.625   | 0.1905  | 0.3889 | Non-genic |
| 1 | rs3761959      | T | C | 0.7031  | 0.3434  | 0.4474 | FCRL3     |
| 1 | rs3856036      | A | C | 0.5625  | 0.1446  | 0.1579 | Non-genic |

|   |                |   |   |         |         |         |           |
|---|----------------|---|---|---------|---------|---------|-----------|
| 1 | rs4128390      | C | T | 0.125   | 0.5116  | 0.3684  | PRSS38    |
| 1 | rs4128841      | C | T | 0.01562 | 0.5872  | 0.4211  | Non-genic |
| 1 | rs4131804      | T | G | 0.7969  | 0.3059  | 0.4474  | RGS7      |
| 1 | rs4659971      | C | T | 0.25    | 0.6369  | 0.4737  | FMN2      |
| 1 | rs4839127      | A | G | 0.6719  | 0.2674  | 0.3684  | Non-genic |
| 1 | rs4949673      | G | T | 0.8281  | 0.3647  | 0.4688  | SLC44A5   |
| 1 | rs508796       | C | T | 0.7812  | 0.3294  | 0.4737  | CSMD2     |
| 1 | rs518769       | G | A | 0.3438  | 0.109   | 0.1316  | TNNI3K    |
| 1 | rs551911       | G | A | 0.1406  | 0.7209  | 0.4737  | Non-genic |
| 1 | rs631840       | T | C | 0.5     | 0.07143 | 0.2368  | ATPAF1    |
| 1 | rs650298       | G | A | 0       | 0.3494  | 0.2895  | FBXO42    |
| 1 | rs6657480      | C | T | 0.6935  | 0.2118  | 0.2632  | EFCAB7    |
| 1 | rs705551       | T | C | 0.5781  | 0.2326  | 0.3947  | Non-genic |
| 1 | rs718003       | T | C | 0.8594  | 0.3     | 0.4444  | Non-genic |
| 1 | rs726865       | A | G | 0.2031  | 0.6456  | 0.5     | Non-genic |
| 1 | rs728611       | G | A | 0.7344  | 0.3155  | 0.4722  | C1orf151  |
| 1 | rs7513934      | G | A | 0.01562 | 0.4884  | 0.3158  | CC2D1B    |
| 1 | rs7535298      | C | T | 0.2656  | 0.641   | 0.4722  | Non-genic |
| 1 | rs7535375      | C | T | 0.04688 | 0.8198  | 0.5     | LYST      |
| 1 | rs769163       | T | C | 0.7344  | 0.3193  | 0.5     | OLFM3     |
| 1 | rs787494       | C | T | 0.4531  | 0.1506  | 0.25    | Non-genic |
| 1 | rs841338       | G | A | 0.5312  | 0.02381 | 0.1944  | Non-genic |
| 1 | rs855858       | C | T | 0.6875  | 0.1419  | 0.3056  | ROR1      |
| 1 | rs856283       | A | G | 0.7188  | 0.2941  | 0.4211  | ROR1      |
| 1 | rs898658       | C | T | 0.01562 | 0.3631  | 0.2368  | SLC9A11   |
| 1 | rs941031       | C | T | 0.1094  | 0.5     | 0.3684  | Non-genic |
| 1 | rs945089       | C | T | 0.0625  | 0.4756  | 0.3158  | Non-genic |
| 1 | rs953035       | A | G | 0.7812  | 0.2     | 0.3684  | PSMB2     |
| 1 | rs966321       | T | G | 0.125   | 0.561   | 0.4211  | Non-genic |
| 2 | rs1049576<br>9 | A | C | 0.4375  | 0.0814  | 0.3947  | ALK       |
| 2 | rs1521537      | C | T | 0.1406  | 0.7134  | 0.4474  | ERBB4     |
| 2 | rs905883       | C | T | 0.5781  | 0.1974  | 0.3824  | ERBB4     |
| 2 | rs1857706      | T | C | 0.4062  | 0.09259 | 0.1842  | FSHR      |
| 2 | rs2300437      | T | C | 0.5938  | 0.1395  | 0.2895  | FSHR      |
| 2 | rs1049619<br>5 | C | A | 0.07812 | 0.2529  | 0.1316  | HK2       |
| 2 | rs1051930<br>9 | T | C | 0       | 0.1824  | 0.05263 | ALMS1     |
| 2 | rs1049619<br>1 | T | C | 0.7656  | 0.2062  | 0.4211  | ALMS1     |
| 2 | rs9288163      | A | G | 0.4375  | 0.09877 | 0.1667  | COL5A2    |
| 2 | rs3106796      | G | A | 0.04688 | 0.4699  | 0.1053  | COL3A1    |
| 2 | rs885346       | T | G | 0.625   | 0.8547  | 0.5     | SLC20A1   |
| 2 | rs4851004      | T | C | 0.7812  | 0.2195  | 0.5     | IL18R1    |
| 2 | rs1018328      | A | G | 0.0625  | 0.5647  | 0.25    | Non-genic |
| 2 | rs1025369      | C | T | 0.03125 | 0.4709  | 0.2105  | Non-genic |
| 2 | rs1033067      | T | C | 0.3281  | 0.8187  | 0.4706  | SPAG16    |
| 2 | rs1033069      | G | A | 0.3281  | 0.8086  | 0.5     | SPAG16    |

|   |            |   |   |         |         |         |           |
|---|------------|---|---|---------|---------|---------|-----------|
| 2 | rs1047307  | A | G | 0.1562  | 0.5203  | 0.25    | CERKL     |
| 2 | rs10490150 | T | C | 0.09375 | 0.3081  | 0.1579  | Non-genic |
| 2 | rs10490186 | T | C | 0.09375 | 0.4939  | 0.25    | DNER      |
| 2 | rs10490190 | G | A | 0.125   | 0.4939  | 0.2368  | Non-genic |
| 2 | rs10490290 | G | A | 0.125   | 0.75    | 0.4062  | PARD3B    |
| 2 | rs10490523 | G | A | 0.01562 | 0.4942  | 0.2368  | Non-genic |
| 2 | rs10490688 | C | A | 0.4062  | 0.8133  | 0.4643  | CERKL     |
| 2 | rs10490689 | A | G | 0.5312  | 0.2324  | 0.4643  | CERKL     |
| 2 | rs10490708 | A | G | 0       | 0.3253  | 0.1053  | LASS6     |
| 2 | rs10490732 | G | T | 0.2344  | 0.5347  | 0.2105  | Non-genic |
| 2 | rs10495633 | C | T | 0.0625  | 0.4177  | 0.1579  | Non-genic |
| 2 | rs10495728 | A | G | 0.04688 | 0.2738  | 0.02632 | Non-genic |
| 2 | rs10495737 | T | C | 0.03125 | 0.506   | 0.1579  | Non-genic |
| 2 | rs10495766 | C | T | 0.3906  | 0.03488 | 0.2895  | Non-genic |
| 2 | rs10495786 | C | T | 0.01562 | 0.2907  | 0.1316  | LTBP1     |
| 2 | rs10495805 | T | G | 0.04688 | 0.5116  | 0.2632  | Non-genic |
| 2 | rs10496043 | A | G | 0       | 0.2035  | 0.05263 | PNPT1     |
| 2 | rs10496157 | T | C | 0.01562 | 0.3187  | 0.1389  | Non-genic |
| 2 | rs10496435 | A | G | 0.03125 | 0.2824  | 0.02632 | NPHP1     |
| 2 | rs10496567 | G | T | 0.2812  | 0.7349  | 0.3421  | CLASP1    |
| 2 | rs10496658 | T | C | 0.4219  | 0.05233 | 0.3158  | Non-genic |
| 2 | rs10496695 | G | A | 0.2344  | 0.09524 | 0.4474  | NCKAP5    |
| 2 | rs10496767 | T | C | 0.25    | 0.7529  | 0.3947  | THSD7B    |
| 2 | rs10496787 | C | T | 0.6719  | 0.8861  | 0.5     | Non-genic |
| 2 | rs10496841 | G | A | 0       | 0.2593  | 0.07895 | LRP1B     |
| 2 | rs10496849 | T | G | 0.0625  | 0.4762  | 0.2353  | LRP1B     |
| 2 | rs10496858 | C | T | 0.5938  | 0.2099  | 0.4211  | LRP1B     |
| 2 | rs10497192 | T | C | 0       | 0.7151  | 0.2895  | ACVR1     |

|   |                |   |   |         |         |         |           |
|---|----------------|---|---|---------|---------|---------|-----------|
| 2 | rs1049741<br>4 | C | T | 0.09375 | 0.3642  | 0.2222  | OLA1      |
| 2 | rs1049760<br>8 | A | G | 0.1562  | 0.5706  | 0.3158  | Non-genic |
| 2 | rs1049761<br>1 | C | T | 0.1406  | 0.5407  | 0.2895  | Non-genic |
| 2 | rs1049768<br>9 | T | C | 0.1094  | 0.025   | 0.2647  | Non-genic |
| 2 | rs1049776<br>8 | G | A | 0.1562  | 0.1084  | 0.3611  | DNAH7     |
| 2 | rs1049778<br>9 | G | T | 0.1875  | 0.747   | 0.3947  | CCDC150   |
| 2 | rs1049786<br>7 | C | T | 0.1406  | 0.6765  | 0.3684  | TRAK2     |
| 2 | rs1049803<br>4 | C | T | 0.4375  | 0.7882  | 0.5     | Non-genic |
| 2 | rs1049804<br>7 | C | T | 0.5312  | 0.1353  | 0.3421  | Non-genic |
| 2 | rs1049807<br>0 | A | C | 0.2656  | 0.7     | 0.4474  | Non-genic |
| 2 | rs1049808<br>3 | T | C | 0.2344  | 0.6013  | 0.2941  | Non-genic |
| 2 | rs1049810<br>2 | A | C | 0.01562 | 0.369   | 0.1842  | Non-genic |
| 2 | rs1049826<br>0 | T | C | 0       | 0.4588  | 0.07895 | DIS3L2    |
| 2 | rs1049826<br>1 | G | A | 0.4844  | 0.08721 | 0.2895  | DIS3L2    |
| 2 | rs1051462<br>2 | A | C | 0.2188  | 0.5783  | 0.3684  | LASS6     |
| 2 | rs1051932<br>7 | G | A | 0.5469  | 0.2151  | 0.4474  | Non-genic |
| 2 | rs1074282      | T | G | 0       | 0.25    | 0.02632 | Non-genic |
| 2 | rs1343822      | G | T | 0.3125  | 0.6753  | 0.3235  | Non-genic |
| 2 | rs1344600      | C | T | 0.03125 | 0.564   | 0.2368  | TMEM169   |
| 2 | rs1357157      | G | A | 0       | 0.6412  | 0.2222  | Non-genic |
| 2 | rs1357851      | T | C | 0.01562 | 0.3588  | 0.1842  | Non-genic |
| 2 | rs1365810      | T | C | 0.5     | 0.1765  | 0.3684  | Non-genic |
| 2 | rs1366842      | A | C | 0.0625  | 0.5549  | 0.1667  | ZNF804A   |
| 2 | rs1367160      | A | C | 0.0625  | 0.3478  | 0.07143 | Non-genic |
| 2 | rs1371427      | G | A | 0.4062  | 0.7647  | 0.5     | Non-genic |
| 2 | rs1399959      | T | C | 0.25    | 0.6512  | 0.4211  | Non-genic |
| 2 | rs1435852      | G | A | 0.6094  | 0.1395  | 0.4211  | Non-genic |
| 2 | rs1453175      | T | C | 0       | 0.1765  | 0.02632 | Non-genic |
| 2 | rs1456572      | T | C | 0.07812 | 0.6919  | 0.2632  | Non-genic |
| 2 | rs1470494      | C | A | 0.01562 | 0.1776  | 0.02778 | Non-genic |
| 2 | rs1470524      | G | A | 0.1875  | 0.6686  | 0.4211  | Non-genic |
| 2 | rs1481374      | G | A | 0.4688  | 0.2375  | 0.3611  | Non-genic |
| 2 | rs1508063      | C | T | 0.3438  | 0.06395 | 0.2368  | Non-genic |
| 2 | rs1513831      | T | G | 0       | 0.1786  | 0.02632 | Non-genic |
| 2 | rs1518635      | T | C | 0.3281  | 0.6488  | 0.2895  | Non-genic |
| 2 | rs1520086      | C | T | 0.01562 | 0.4583  | 0.1316  | Non-genic |

|   |                |   |   |         |         |         |           |
|---|----------------|---|---|---------|---------|---------|-----------|
| 2 | rs1533388      | T | C | 0.5156  | 0.1765  | 0.3947  | Non-genic |
| 2 | rs155594       | A | G | 0.6094  | 0.1145  | 0.3684  | CYTIP     |
| 2 | rs155595       | A | G | 0.6094  | 0.1105  | 0.3684  | CYTIP     |
| 2 | rs1559004      | C | T | 0.2812  | 0.6301  | 0.3947  | GALNT13   |
| 2 | rs1564935      | T | C | 0       | 0.4244  | 0.2105  | Non-genic |
| 2 | rs1582630      | G | A | 0.4688  | 0.1105  | 0.3158  | Non-genic |
| 2 | rs1643209      | C | T | 0.04688 | 0.7561  | 0.3947  | Non-genic |
| 2 | rs1704379<br>4 | T | C | 0.3594  | 0.06579 | 0.2222  | Non-genic |
| 2 | rs1869829      | A | G | 0.04688 | 0.314   | 0.1316  | RAB3GAP1  |
| 2 | rs1878847      | C | T | 0.2031  | 0.9217  | 0.5     | Non-genic |
| 2 | rs1901798      | T | C | 0.03125 | 0.3547  | 0.1579  | THSD7B    |
| 2 | rs1902241      | C | T | 0.1875  | 0.7469  | 0.3947  | Non-genic |
| 2 | rs1912181      | T | C | 0.5938  | 0.1603  | 0.3947  | SPAG16    |
| 2 | rs1914034      | T | C | 0.07812 | 0.4471  | 0.2368  | Non-genic |
| 2 | rs1947892      | G | A | 0.2812  | 0.2468  | 0.3333  | Non-genic |
| 2 | rs1986415      | A | G | 0       | 0.2892  | 0.02778 | AOX1      |
| 2 | rs1991315      | T | G | 0.5469  | 0.189   | 0.4     | Non-genic |
| 2 | rs2014401      | T | C | 0.5156  | 0.1173  | 0.3333  | PID1      |
| 2 | rs2046266      | C | A | 0.09375 | 0.5443  | 0.1944  | Non-genic |
| 2 | rs2109818      | G | A | 0.2031  | 0.5176  | 0.1579  | PID1      |
| 2 | rs2118381      | A | G | 0.4219  | 0.7679  | 0.4211  | Non-genic |
| 2 | rs2119090      | C | T | 0.2812  | 0.02532 | 0.2368  | Non-genic |
| 2 | rs2139246      | A | G | 0.3906  | 0.09412 | 0.2895  | MEIS1     |
| 2 | rs2191590      | T | C | 0.3281  | 0.7529  | 0.5     | Non-genic |
| 2 | rs2194747      | G | A | 0.1094  | 0.5595  | 0.1944  | Non-genic |
| 2 | rs2194748      | T | C | 0.1094  | 0.4826  | 0.1316  | Non-genic |
| 2 | rs2216460      | C | A | 0.1562  | 0.7118  | 0.2632  | FAM124B   |
| 2 | rs2222186      | C | T | 0.1875  | 0.7326  | 0.2632  | Non-genic |
| 2 | rs2333821      | A | G | 0.4062  | 0.08235 | 0.3421  | Non-genic |
| 2 | rs2334802      | G | A | 0.2344  | 0.6686  | 0.3684  | PARD3B    |
| 2 | rs2674063      | G | T | 0.3125  | 0.6731  | 0.3438  | Non-genic |
| 2 | rs2675045      | G | A | 0.2667  | 0.6037  | 0.4211  | NUP35     |
| 2 | rs267992       | C | T | 0.6406  | 0.141   | 0.4167  | CYTIP     |
| 2 | rs2693833      | G | A | 0.04688 | 0.4036  | 0.2105  | Non-genic |
| 2 | rs2710251      | T | C | 0.2031  | 0.6964  | 0.4474  | STK36     |
| 2 | rs280734       | G | A | 0.125   | 0.4444  | 0.2647  | Non-genic |
| 2 | rs313289       | A | G | 0.7188  | 0.1471  | 0.4737  | Non-genic |
| 2 | rs332921       | G | A | 0.5156  | 0.1353  | 0.3421  | Non-genic |
| 2 | rs350792       | T | C | 0.1406  | 0.3988  | 0.2105  | Non-genic |
| 2 | rs360235       | C | A | 0.03125 | 0.375   | 0.1579  | Non-genic |
| 2 | rs3754991      | A | G | 0.09375 | 0.5765  | 0.2895  | PDE11A    |
| 2 | rs3755427      | T | C | 0.2344  | 0.6325  | 0.4211  | BAZ2B     |
| 2 | rs3769154      | C | A | 0.3594  | 0.08721 | 0.3056  | -         |
| 2 | rs3770857      | G | A | 0       | 0.3605  | 0.1579  | CRIM1     |
| 2 | rs3792017      | A | C | 0.3906  | 0.07229 | 0.3056  | DYNC2LI1  |
| 2 | rs3924563      | C | T | 0.625   | 0.02976 | 0.3889  | VWC2L     |
| 2 | rs4233905      | C | A | 0.2188  | 0.6607  | 0.2895  | Non-genic |
| 2 | rs4321351      | G | A | 0.04688 | 0.3598  | 0.05263 | PID1      |

|   |           |   |   |         |         |         |           |
|---|-----------|---|---|---------|---------|---------|-----------|
| 2 | rs4411698 | C | T | 0.04688 | 0.3333  | 0.07895 | Non-genic |
| 2 | rs4667014 | C | T | 0.125   | 0.5412  | 0.2105  | Non-genic |
| 2 | rs4848607 | G | A | 0.2344  | 0.6294  | 0.3421  | Non-genic |
| 2 | rs4893980 | C | T | 0.2344  | 0.7169  | 0.4167  | PDE11A    |
| 2 | rs4952676 | G | A | 0.1875  | 0.5407  | 0.2632  | PLEKHH2   |
| 2 | rs4954126 | G | A | 0.1562  | 0.08209 | 0.2941  | MGAT5     |
| 2 | rs4954265 | A | G | 0.2969  | 0.631   | 0.3333  | R3HDM1    |
| 2 | rs506134  | A | G | 0.2031  | 0.3253  | 0.1842  | PRKCE     |
| 2 | rs6432212 | T | C | 0.3125  | 0.7857  | 0.5     | GREB1     |
| 2 | rs6432214 | C | T | 0.3125  | 0.7882  | 0.5     | GREB1     |
| 2 | rs6434859 | G | A | 0.2812  | 0.7378  | 0.4167  | HECW2     |
| 2 | rs6542461 | A | G | 0.3125  | 0.7151  | 0.4474  | Non-genic |
| 2 | rs6732952 | C | T | 0.1719  | 0.6325  | 0.3421  | Non-genic |
| 2 | rs6737535 | C | A | 0.1719  | 0.6867  | 0.4211  | Non-genic |
| 2 | rs6740690 | C | A | 0.03125 | 0.3059  | 0.07895 | Non-genic |
| 2 | rs6741304 | A | G | 0.1719  | 0.4765  | 0.1842  | Non-genic |
| 2 | rs6753354 | G | A | 0.4219  | 0.1337  | 0.3158  | -         |
| 2 | rs6755175 | G | A | 0.4219  | 0.09877 | 0.3158  | ITGA6     |
| 2 | rs6760896 | A | G | 0.1406  | 0.8023  | 0.4474  | DIS3L2    |
| 2 | rs719667  | T | C | 0.04688 | 0.5941  | 0.1842  | CHCHD5    |
| 2 | rs720796  | A | C | 0.1406  | 0.6494  | 0.3684  | Non-genic |
| 2 | rs721064  | G | A | 0       | 0.4464  | 0.1316  | Non-genic |
| 2 | rs724710  | T | C | 0.1875  | 0.4765  | 0.07895 | BCL2L11   |
| 2 | rs735436  | G | A | 0.3594  | 0.05357 | 0.2368  | MYO3B     |
| 2 | rs750772  | G | A | 0.375   | 0.09036 | 0.2895  | Non-genic |
| 2 | rs7574678 | C | A | 0.1562  | 0.6646  | 0.1842  | Non-genic |
| 2 | rs7575543 | T | C | 0.4219  | 0.9085  | 0.4474  | Non-genic |
| 2 | rs7576149 | T | C | 0.3594  | 0.04938 | 0.4211  | C2orf43   |
| 2 | rs7578937 | A | G | 0.5469  | 0.07595 | 0.3947  | Non-genic |
| 2 | rs7583500 | C | T | 0.1719  | 0.4444  | 0.1053  | Non-genic |
| 2 | rs7597348 | G | A | 0.2188  | 0.6667  | 0.2895  | Non-genic |
| 2 | rs7608702 | G | A | 0.5938  | 0.03049 | 0.4474  | R3HDM1    |
| 2 | rs763860  | T | C | 0.4062  | 0.7403  | 0.4     | CERKL     |
| 2 | rs842561  | A | C | 0.4688  | 0.04706 | 0.2895  | Non-genic |
| 2 | rs873153  | T | G | 0.5781  | 0.1975  | 0.4722  | Non-genic |
| 2 | rs886770  | C | A | 0.6094  | 0.08929 | 0.3684  | PKP4      |
| 2 | rs921322  | A | G | 0.1094  | 0.5238  | 0.1842  | PQLC3     |
| 2 | rs9287422 | A | C | 0.01562 | 0.3529  | 0.1053  | GPR39     |
| 2 | rs9287766 | T | C | 0.2656  | 0.6937  | 0.4211  | Non-genic |
| 2 | rs9287767 | G | A | 0.5469  | 0.1234  | 0.5     | Non-genic |
| 2 | rs9288570 | A | G | 0.6562  | 0.2917  | 0.5     | EPHA4     |
| 2 | rs9308697 | T | C | 0.3125  | 0.7412  | 0.5     | DPP10     |
| 2 | rs9308742 | G | A | 0.2812  | 0.7471  | 0.2632  | Non-genic |
| 2 | rs951629  | G | A | 0.1406  | 0.5116  | 0.1389  | Non-genic |
| 2 | rs951954  | C | T | 0.2344  | 0.9529  | 0.5     | Non-genic |
| 2 | rs952203  | G | A | 0.5     | 0.1453  | 0.3684  | Non-genic |
| 2 | rs957781  | A | G | 0.1562  | 0.08235 | 0.3421  | DNAH7     |
| 2 | rs974260  | C | T | 0.3438  | 0.7622  | 0.4737  | Non-genic |



|   |                |   |   |         |         |         |           |
|---|----------------|---|---|---------|---------|---------|-----------|
| 2 | rs989720       | C | T | 0.3438  | 0.6471  | 0.4474  | Non-genic |
| 2 | rs995308       | G | A | 0.625   | 0.2616  | 0.4737  | Non-genic |
| 2 | rs998429       | G | T | 0.04688 | 0.2561  | 0.02632 | DPP10     |
| 2 | rs1048821      | T | G | 0.6719  | 0.2976  | 0.2632  | THSD7B    |
| 2 | rs1049010<br>5 | A | G | 0.04688 | 0.3235  | 0.2895  | Non-genic |
| 2 | rs1049017<br>0 | T | C | 0.01562 | 0.2971  | 0.1667  | NRXN1     |
| 2 | rs1049019<br>3 | A | C | 0.01562 | 0.3494  | 0.2632  | Non-genic |
| 2 | rs1049025<br>1 | A | G | 0       | 0.369   | 0.2105  | Non-genic |
| 2 | rs1049046<br>5 | A | G | 0.0625  | 0.3779  | 0.2895  | Non-genic |
| 2 | rs1049057<br>7 | T | G | 0.7656  | 0.2357  | 0.3684  | Non-genic |
| 2 | rs1049567<br>3 | G | A | 0.04688 | 0.3025  | 0.2059  | Non-genic |
| 2 | rs1049575<br>1 | C | T | 0.375   | 0.08721 | 0.1176  | Non-genic |
| 2 | rs1049604<br>4 | G | T | 0.4375  | 0.05233 | 0.1842  | PNPT1     |
| 2 | rs1049608<br>2 | T | C | 0.5781  | 0.2118  | 0.3684  | Non-genic |
| 2 | rs1049609<br>1 | A | G | 0.5     | 0.1235  | 0.2368  | USP34     |
| 2 | rs1049611<br>6 | G | T | 0.3438  | 0.075   | 0.1842  | Non-genic |
| 2 | rs1049688<br>2 | C | T | 0.7969  | 0.3393  | 0.4737  | LRP1B     |
| 2 | rs1049703<br>2 | T | C | 0.6875  | 0.2     | 0.3947  | Non-genic |
| 2 | rs1049718<br>7 | G | A | 0.6406  | 0.1975  | 0.3947  | Non-genic |
| 2 | rs1049728<br>9 | T | G | 0.03125 | 0.2625  | 0.3947  | Non-genic |
| 2 | rs1049731<br>0 | G | A | 0.5172  | 0.1765  | 0.3158  | XIRP2     |
| 2 | rs1049746<br>6 | C | T | 0.9062  | 0.4217  | 0.3947  | Non-genic |
| 2 | rs1049770<br>3 | G | A | 0.9375  | 0.5244  | 0.3947  | Non-genic |
| 2 | rs1049770<br>5 | C | T | 0.1094  | 0.5058  | 0.4737  | Non-genic |
| 2 | rs1049775<br>9 | C | T | 0.1094  | 0.5814  | 0.3684  | Non-genic |
| 2 | rs1049812<br>4 | G | A | 0.3438  | 0.04651 | 0.1316  | Non-genic |
| 2 | rs1051462<br>4 | C | T | 0.4688  | 0.1795  | 0.2308  | CERKL     |
| 2 | rs1051591<br>8 | C | T | 0       | 0.2857  | 0.1579  | Non-genic |
| 2 | rs1051972<br>2 | G | A | 0.8906  | 0.4535  | 0.5     | Non-genic |

|   |            |   |   |         |         |         |           |
|---|------------|---|---|---------|---------|---------|-----------|
| 2 | rs10520176 | T | C | 0.07812 | 0.4632  | 0.4722  | Non-genic |
| 2 | rs1117907  | G | A | 0.6094  | 0.1977  | 0.2222  | Non-genic |
| 2 | rs1117908  | T | C | 0.6094  | 0.2027  | 0.2222  | Non-genic |
| 2 | rs1344242  | T | C | 0.7656  | 0.1512  | 0.3684  | Non-genic |
| 2 | rs1368909  | C | T | 0.1094  | 0.5476  | 0.4211  | CTNNA2    |
| 2 | rs1371549  | T | G | 0.04688 | 0.1988  | 0.1765  | Non-genic |
| 2 | rs1379022  | C | T | 0.2344  | 0.5181  | 0.4737  | Non-genic |
| 2 | rs1380703  | G | A | 0.07812 | 0.5062  | 0.3158  | Non-genic |
| 2 | rs1432216  | T | C | 0.04688 | 0.3647  | 0.2105  | THSD7B    |
| 2 | rs1437927  | A | G | 0.6719  | 0.2744  | 0.4211  | Non-genic |
| 2 | rs1443671  | G | A | 0.7188  | 0.2849  | 0.3947  | Non-genic |
| 2 | rs1452786  | A | G | 0.01562 | 0.2763  | 0.3529  | NRXN1     |
| 2 | rs1474402  | G | A | 0.1406  | 0.5655  | 0.4474  | Non-genic |
| 2 | rs1510726  | C | T | 0.04688 | 0.4059  | 0.2632  | Non-genic |
| 2 | rs1527757  | A | G | 0.03125 | 0.4383  | 0.4118  | Non-genic |
| 2 | rs1533948  | G | A | 0.5469  | 0.3095  | 0.2895  | FEZ2      |
| 2 | rs1561296  | C | T | 0.1562  | 0.5353  | 0.3947  | SPATS2L   |
| 2 | rs1607666  | A | G | 0.6719  | 0.2202  | 0.3684  | Non-genic |
| 2 | rs1608578  | A | G | 0.4375  | 0.1012  | 0.2368  | Non-genic |
| 2 | rs1911544  | C | T | 0.1406  | 0.5938  | 0.3684  | Non-genic |
| 2 | rs2029629  | T | C | 0.4375  | 0.2566  | 0.06667 | Non-genic |
| 2 | rs2048935  | T | C | 0.04688 | 0.3563  | 0.2105  | KIAA1486  |
| 2 | rs2103127  | G | A | 0.09375 | 0.4765  | 0.4722  | Non-genic |
| 2 | rs2168024  | A | G | 0.5156  | 0.2067  | 0.2353  | CNTNAP5   |
| 2 | rs2178046  | C | T | 0.5781  | 0.1905  | 0.3684  | Non-genic |
| 2 | rs2250204  | G | A | 0.04688 | 0.4706  | 0.3947  | EPHA4     |
| 2 | rs2310186  | G | T | 0.625   | 0.2093  | 0.3947  | Non-genic |
| 2 | rs2320399  | G | T | 0.1562  | 0.5309  | 0.4167  | NCKAP5    |
| 2 | rs232570   | T | C | 0.09375 | 0.4471  | 0.3158  | Non-genic |
| 2 | rs2363731  | T | C | 0.2188  | 0.01765 | 0.05263 | Non-genic |
| 2 | rs2421973  | G | T | 0.5312  | 0.2176  | 0.2895  | Non-genic |
| 2 | rs2718653  | A | G | 0.04688 | 0.4882  | 0.2778  | PLEKHM3   |
| 2 | rs281541   | T | C | 0.4375  | 0.1221  | 0.1316  | DOCK10    |
| 2 | rs2885116  | C | T | 0.03125 | 0.4128  | 0.2632  | KIAA1715  |
| 2 | rs309271   | G | T | 0.03125 | 0.4259  | 0.2632  | Non-genic |
| 2 | rs343150   | A | G | 0.04688 | 0.4244  | 0.2368  | Non-genic |
| 2 | rs3754743  | T | G | 0       | 0.3412  | 0.2632  | -         |
| 2 | rs3768730  | G | T | 0.0625  | 0.3882  | 0.3947  | EPAS1     |
| 2 | rs3769583  | T | C | 0       | 0.4036  | 0.2368  | TTC27     |
| 2 | rs3821236  | A | G | 0.4688  | 0.1687  | 0.2632  | STAT4     |
| 2 | rs385909   | A | G | 0.5312  | 0.06977 | 0.2632  | Non-genic |
| 2 | rs4233816  | T | C | 0.01562 | 0.2901  | 0.3421  | Non-genic |
| 2 | rs4347829  | C | T | 0.01562 | 0.2308  | 0.1562  | Non-genic |
| 2 | rs454305   | A | G | 0.2812  | 0.6047  | 0.4474  | TGFA      |
| 2 | rs4848220  | A | G | 0.07812 | 0.4826  | 0.3421  | Non-genic |
| 2 | rs4849943  | A | C | 0.6406  | 0.2733  | 0.2895  | Non-genic |
| 2 | rs4894229  | C | T | 0.625   | 0.07647 | 0.2368  | Non-genic |
| 2 | rs4952535  | A | G | 0.07812 | 0.4529  | 0.3158  | Non-genic |

|   |                |   |   |         |         |        |           |
|---|----------------|---|---|---------|---------|--------|-----------|
| 2 | rs4953032      | C | T | 0.2188  | 0.5581  | 0.3947 | LRPPRC    |
| 2 | rs531864       | T | C | 0.2188  | 0.5523  | 0.4474 | NOSTRIN   |
| 2 | rs6430043      | A | G | 0.1094  | 0.4878  | 0.3684 | Non-genic |
| 2 | rs6436908      | T | C | 0.1562  | 0.5176  | 0.4211 | Non-genic |
| 2 | rs6542217      | A | G | 0.8125  | 0.2987  | 0.4474 | DPP10     |
| 2 | rs6545261      | G | A | 0.2188  | 0.6013  | 0.4211 | Non-genic |
| 2 | rs6707591      | A | G | 0.8906  | 0.375   | 0.5    | MGAT5     |
| 2 | rs6714524      | T | C | 0.5938  | 0.1667  | 0.3611 | Non-genic |
| 2 | rs6719271      | G | A | 0.2969  | 0.05814 | 0.1579 | TCF7L1    |
| 2 | rs6744417      | C | T | 0.4844  | 0.1607  | 0.2632 | VWA3B     |
| 2 | rs6748458      | G | A | 0.5     | 0.1337  | 0.2895 | VWA3B     |
| 2 | rs6755106      | G | A | 0.1562  | 0.561   | 0.4444 | Non-genic |
| 2 | rs719736       | A | G | 0       | 0.4651  | 0.2778 | Non-genic |
| 2 | rs723042       | A | G | 0.75    | 0.3488  | 0.4211 | LTBP1     |
| 2 | rs723504       | C | T | 0.2812  | 0.5988  | 0.4474 | Non-genic |
| 2 | rs7425925      | T | C | 0.125   | 0.6234  | 0.3824 | Non-genic |
| 2 | rs7562974      | C | T | 0.7031  | 0.3882  | 0.5    | IKZF2     |
| 2 | rs7599875      | C | A | 0.03125 | 0.6375  | 0.3889 | Non-genic |
| 2 | rs7602393      | T | C | 0.7344  | 0.2651  | 0.3947 | Non-genic |
| 2 | rs7607300      | A | G | 0.8125  | 0.4412  | 0.4737 | Non-genic |
| 2 | rs805365       | T | G | 0.1719  | 0.4588  | 0.3421 | PSME4     |
| 2 | rs805399       | A | G | 0.1719  | 0.439   | 0.3421 | PSME4     |
| 2 | rs843645       | G | T | 0.0625  | 0.4647  | 0.3947 | ACYP2     |
| 2 | rs872288       | A | C | 0.09375 | 0.4302  | 0.2632 | PRKCE     |
| 2 | rs874816       | C | T | 0.8125  | 0.25    | 0.4211 | Non-genic |
| 2 | rs877123       | A | G | 0.6562  | 0.1812  | 0.2632 | Non-genic |
| 2 | rs920218       | T | C | 0.4219  | 0.07143 | 0.1579 | Non-genic |
| 2 | rs9287806      | G | A | 0.4688  | 0.1709  | 0.2941 | Non-genic |
| 2 | rs9287949      | T | C | 0.8438  | 0.2471  | 0.3947 | Non-genic |
| 2 | rs9287950      | A | C | 0.8438  | 0.2442  | 0.3947 | Non-genic |
| 2 | rs9308948      | G | A | 0.1562  | 0.4935  | 0.375  | Non-genic |
| 2 | rs9309181      | T | G | 0.2188  | 0.6802  | 0.4737 | NRXN1     |
| 2 | rs939425       | C | T | 0.0625  | 0.4938  | 0.4211 | NRXN1     |
| 2 | rs951376       | A | G | 0.0625  | 0.4819  | 0.3    | Non-genic |
| 2 | rs958396       | A | G | 0.4688  | 0.1772  | 0.1111 | DPP10     |
| 2 | rs958790       | G | T | 0.75    | 0.2209  | 0.4737 | Non-genic |
| 2 | rs964864       | A | G | 0.5469  | 0.1786  | 0.3125 | Non-genic |
| 2 | rs966391       | G | A | 0       | 0.3095  | 0.1667 | Non-genic |
| 2 | rs966414       | G | A | 0.5     | 0.1221  | 0.2632 | Non-genic |
| 3 | rs746875       | T | C | 0.4844  | 0.09494 | 0.3235 | THR3      |
| 3 | rs1153606      | G | A | 0.4844  | 0.1607  | 0.3684 | RARB      |
| 3 | rs1299407      | G | A | 0.2188  | 0.6548  | 0.2895 | RARB      |
| 3 | rs1391950      | T | C | 0.1406  | 0.4709  | 0.1053 | GRM7      |
| 3 | rs779708       | G | A | 0.04688 | 0.3976  | 0.1053 | GRM7      |
| 3 | rs984123       | T | C | 0.4219  | 0.06875 | 0.2778 | GRM7      |
| 3 | rs1051036<br>6 | A | G | 0.6094  | 0.1437  | 0.2632 | GRM7      |
| 3 | rs2122417      | T | C | 0.4062  | 0.06395 | 0.1579 | GRM7      |
| 3 | rs1877960      | A | G | 0.1562  | 0.6395  | 0.3947 | LARS2     |

|   |                |   |   |         |         |         |           |
|---|----------------|---|---|---------|---------|---------|-----------|
| 3 | rs6763887      | T | C | 0.0625  | 0.3118  | 0.07895 | IGF2BP2   |
| 3 | rs1010471      | G | A | 0.1094  | 0.4817  | 0.2105  | FXR1      |
| 3 | rs1039027      | A | G | 0.01562 | 0.5     | 0.125   | FNDC3B    |
| 3 | rs1051022<br>9 | T | G | 0.01562 | 0.1524  | 0.05556 | CNTN4     |
| 3 | rs1051032<br>7 | G | A | 0       | 0.09211 | 0.02778 | Non-genic |
| 3 | rs1051033<br>1 | G | T | 0.07812 | 0.2941  | 0.02632 | Non-genic |
| 3 | rs1051046<br>5 | G | A | 0.375   | 0.02976 | 0.2895  | Non-genic |
| 3 | rs1051052<br>1 | C | A | 0.2344  | 0.6937  | 0.3158  | Non-genic |
| 3 | rs1051059<br>2 | G | A | 0.1719  | 0.3824  | 0.07895 | NEK10     |
| 3 | rs1051101<br>7 | C | T | 0.0625  | 0.1728  | 0.02941 | FOXP1     |
| 3 | rs1051102<br>2 | T | C | 0.2344  | 0.744   | 0.3158  | Non-genic |
| 3 | rs1051102<br>7 | G | T | 0       | 0.375   | 0.1579  | Non-genic |
| 3 | rs1051105<br>1 | C | A | 0.0625  | 0.4103  | 0.1579  | Non-genic |
| 3 | rs1051106<br>1 | T | C | 0.5     | 0.1467  | 0.3333  | Non-genic |
| 3 | rs1051110<br>8 | C | T | 0.09375 | 0.2143  | 0.05263 | Non-genic |
| 3 | rs1051111<br>9 | T | C | 0.1875  | 0.4942  | 0.2895  | Non-genic |
| 3 | rs1051115<br>3 | C | A | 0       | 0.3704  | 0.1667  | Non-genic |
| 3 | rs1051124<br>9 | A | C | 0.4688  | 0.1513  | 0.3947  | Non-genic |
| 3 | rs1051130<br>8 | T | C | 0.07812 | 0.3869  | 0.1842  | SLC9A10   |
| 3 | rs1051133<br>0 | C | T | 0.5156  | 0.075   | 0.3529  | ZBTB20    |
| 3 | rs1051296<br>7 | G | A | 0.4531  | 0.1265  | 0.3529  | Non-genic |
| 3 | rs1051297<br>5 | C | T | 0.09375 | 0.593   | 0.1842  | Non-genic |
| 3 | rs1051311<br>2 | G | A | 0.03125 | 0.6071  | 0.2895  | CLSTN2    |
| 3 | rs1051327<br>4 | A | C | 0.03125 | 0.4458  | 0.1579  | Non-genic |
| 3 | rs1051333<br>3 | G | A | 0.0625  | 0.4275  | 0.1176  | Non-genic |
| 3 | rs1051343<br>2 | C | T | 0.4531  | 0.1337  | 0.3421  | Non-genic |
| 3 | rs1051348<br>6 | T | C | 0.25    | 0.6163  | 0.3158  | KCNAB1    |
| 3 | rs1051353<br>4 | G | T | 0.01562 | 0.5793  | 0.2632  | IQCJ      |
| 3 | rs1051365      | A | G | 0       | 0.1176  | 0       | Non-genic |

|   |                |   |   |         |         |         |           |
|---|----------------|---|---|---------|---------|---------|-----------|
|   | 6              |   |   |         |         |         |           |
| 3 | rs1051375<br>6 | T | C | 0       | 0.3052  | 0.1316  | Non-genic |
| 3 | rs1051376<br>7 | A | G | 0.2344  | 0.09524 | 0.4474  | Non-genic |
| 3 | rs1051382<br>9 | G | A | 0.09375 | 0.5412  | 0.1842  | LPP       |
| 3 | rs1112792      | C | T | 0.4844  | 0.7115  | 0.3235  | Non-genic |
| 3 | rs1158143      | T | C | 0.6875  | 0.1726  | 0.4474  | SNTN      |
| 3 | rs1351865      | G | A | 0.2812  | 0.5412  | 0.2368  | Non-genic |
| 3 | rs1372398      | C | T | 0.07812 | 0.4937  | 0.1842  | Non-genic |
| 3 | rs1383407      | C | T | 0.01562 | 0.6456  | 0.2632  | ROBO1     |
| 3 | rs1391961      | A | G | 0.125   | 0.4337  | 0.1842  | Non-genic |
| 3 | rs1392326      | T | C | 0.1406  | 0.7857  | 0.1667  | Non-genic |
| 3 | rs1392702      | C | T | 0.09375 | 0.4882  | 0.2632  | ARHGEF3   |
| 3 | rs1398101      | G | T | 0.4844  | 0.1131  | 0.3421  | CMTM8     |
| 3 | rs1402229      | C | T | 0.03125 | 0.5353  | 0.2368  | Non-genic |
| 3 | rs1449287      | T | C | 0.2969  | 0.04762 | 0.3421  | RBMS3     |
| 3 | rs1479139      | T | C | 0.01562 | 0.4936  | 0.2308  | Non-genic |
| 3 | rs1488745      | G | T | 0.09375 | 0.4819  | 0.2105  | Non-genic |
| 3 | rs1497418      | A | G | 0.6094  | 0.06962 | 0.4118  | Non-genic |
| 3 | rs1500415      | T | C | 0.4219  | 0.8012  | 0.4688  | Non-genic |
| 3 | rs1515442      | T | C | 0.1875  | 0.6145  | 0.3056  | SPATA16   |
| 3 | rs1531913      | C | A | 0.1562  | 0.5179  | 0.3158  | Non-genic |
| 3 | rs155896       | C | A | 0.1406  | 0.4444  | 0.2059  | CNTN6     |
| 3 | rs1559796      | G | A | 0.2031  | 0.7907  | 0.4444  | CLSTN2    |
| 3 | rs1619451      | G | A | 0.6406  | 0.2108  | 0.4737  | LSAMP     |
| 3 | rs1695183      | A | G | 0.5312  | 0.843   | 0.4444  | UBE2E2    |
| 3 | rs1707691      | A | G | 0.2656  | 0.6768  | 0.3056  | Non-genic |
| 3 | rs171239       | C | T | 0.09375 | 0.3471  | 0.1053  | Non-genic |
| 3 | rs1851236      | A | G | 0       | 0.2778  | 0.07895 | Non-genic |
| 3 | rs1873008      | A | G | 0.3438  | 0.8647  | 0.3421  | Non-genic |
| 3 | rs1873038      | C | T | 0.1094  | 0.4244  | 0.1316  | NLGN1     |
| 3 | rs1874952      | G | A | 0.1562  | 0.6163  | 0.3158  | KCNAB1    |
| 3 | rs1875517      | A | G | 0.2031  | 0.4932  | 0.2941  | Non-genic |
| 3 | rs1878007      | A | G | 0.01562 | 0.2222  | 0.02778 | SPATA16   |
| 3 | rs1931170      | T | C | 0.4219  | 0.09375 | 0.3056  | NAALADL2  |
| 3 | rs1992093      | G | A | 0.2812  | 0.7412  | 0.2632  | C3orf58   |
| 3 | rs2047370      | G | A | 0.03125 | 0.4054  | 0.08333 | Non-genic |
| 3 | rs2052760      | A | C | 0.2188  | 0.7294  | 0.4211  | Non-genic |
| 3 | rs2077774      | C | A | 0.07812 | 0.5685  | 0.08333 | FHIT      |
| 3 | rs2129824      | T | C | 0.4688  | 0.157   | 0.3421  | Non-genic |
| 3 | rs2132599      | G | T | 0.4688  | 0.1176  | 0.3158  | Non-genic |
| 3 | rs2141621      | G | A | 0.1406  | 0.4529  | 0.1579  | Non-genic |
| 3 | rs2173461      | C | A | 0       | 0.25    | 0.05263 | UBE2E2    |
| 3 | rs2178419      | A | G | 0.5781  | 0.07229 | 0.4211  | Non-genic |
| 3 | rs2196302      | A | G | 0.04688 | 0.3598  | 0.08333 | Non-genic |
| 3 | rs2241330      | T | C | 0.2656  | 0.858   | 0.4211  | Non-genic |
| 3 | rs2293171      | T | C | 0.1562  | 0.6667  | 0.3158  | FOXP1     |

|   |           |   |   |         |         |         |           |
|---|-----------|---|---|---------|---------|---------|-----------|
| 3 | rs2365054 | A | C | 0       | 0.2381  | 0.1053  | FHIT      |
| 3 | rs2399009 | C | T | 0.7031  | 0.03529 | 0.3947  | Non-genic |
| 3 | rs2588359 | G | A | 0.4375  | 0.08235 | 0.2895  | LRRN1     |
| 3 | rs2600306 | T | C | 0.03125 | 0.343   | 0.07895 | CNTN4     |
| 3 | rs2619566 | A | G | 0.375   | 0.6875  | 0.1842  | CNTN4     |
| 3 | rs2626479 | G | A | 0.5     | 0.1706  | 0.3684  | Non-genic |
| 3 | rs2717302 | A | G | 0.4375  | 0.1118  | 0.3947  | Non-genic |
| 3 | rs280128  | A | G | 0.4531  | 0.1588  | 0.4737  | Non-genic |
| 3 | rs281811  | T | C | 0.3281  | 0.6471  | 0.3611  | Non-genic |
| 3 | rs2863381 | C | T | 0       | 0.494   | 0.1316  | Non-genic |
| 3 | rs2895250 | G | A | 0.5469  | 0.25    | 0.4474  | Non-genic |
| 3 | rs295433  | T | C | 0.1406  | 0.3133  | 0.1389  | KLHL18    |
| 3 | rs304051  | T | C | 0.2656  | 0.6279  | 0.2895  | ITPR1     |
| 3 | rs3106818 | C | A | 0.01562 | 0.2892  | 0.1053  | MECOM     |
| 3 | rs322695  | A | G | 0.01562 | 0.3025  | 0.05556 | Non-genic |
| 3 | rs323629  | A | C | 0.0625  | 0.657   | 0.2895  | Non-genic |
| 3 | rs345585  | G | T | 0.3125  | 0.7733  | 0.4333  | Non-genic |
| 3 | rs35883   | A | G | 0.3125  | 0.6105  | 0.2105  | RBMS3     |
| 3 | rs360889  | A | G | 0.6562  | 0.1607  | 0.4737  | Non-genic |
| 3 | rs3805021 | C | A | 0.07812 | 0.3488  | 0.07895 | ITPR1     |
| 3 | rs3911498 | A | G | 0.07812 | 0.1765  | 0.05263 | ZNF385D   |
| 3 | rs3916092 | A | G | 0.5781  | 0.0814  | 0.4737  | EFHB      |
| 3 | rs3920230 | C | T | 0.04688 | 0.3827  | 0.2105  | PLSCR4    |
| 3 | rs4131907 | T | C | 0.2969  | 0.09722 | 0.3235  | Non-genic |
| 3 | rs4277695 | C | T | 0.01562 | 0.3782  | 0.1389  | FAM19A1   |
| 3 | rs4857258 | C | T | 0.375   | 0.08025 | 0.3158  | EPHA6     |
| 3 | rs582288  | C | T | 0.5312  | 0.09412 | 0.3824  | KALRN     |
| 3 | rs6437907 | T | G | 0.4688  | 0.1266  | 0.3235  | Non-genic |
| 3 | rs6443552 | T | C | 0.4688  | 0.09524 | 0.4474  | KCNMB2    |
| 3 | rs6549127 | T | C | 0.2812  | 0.3086  | 0.1176  | FAM19A1   |
| 3 | rs6549877 | A | G | 0.4688  | 0.1607  | 0.4722  | Non-genic |
| 3 | rs676290  | C | T | 0.09375 | 0.6488  | 0.2222  | LAMP3     |
| 3 | rs6780053 | A | G | 0.2969  | 0.7349  | 0.4211  | MED12L    |
| 3 | rs6803199 | C | T | 0.2344  | 0.6446  | 0.4211  | CACNA2D3  |
| 3 | rs698099  | G | A | 0.5938  | 0.1412  | 0.3684  | MASP1     |
| 3 | rs704275  | G | A | 0.01562 | 0.5349  | 0.2632  | Non-genic |
| 3 | rs709086  | C | T | 0.04688 | 0.2976  | 0.0625  | Non-genic |
| 3 | rs711673  | C | T | 0.03125 | 0.4059  | 0.1842  | Non-genic |
| 3 | rs711674  | A | G | 0.03125 | 0.4059  | 0.1842  | Non-genic |
| 3 | rs718424  | T | C | 0.07812 | 0.5542  | 0.2368  | Non-genic |
| 3 | rs725382  | A | G | 0.3281  | 0.7566  | 0.4706  | Non-genic |
| 3 | rs725542  | A | G | 0.5312  | 0.3     | 0.4615  | Non-genic |
| 3 | rs732190  | T | G | 0.4062  | 0.1163  | 0.4474  | Non-genic |
| 3 | rs7431865 | A | G | 0.03125 | 0.3824  | 0.1053  | CNTN4     |
| 3 | rs75239   | A | G | 0.1094  | 0.525   | 0.1944  | Non-genic |
| 3 | rs7617449 | C | T | 0.5312  | 0.9217  | 0.4737  | Non-genic |
| 3 | rs7637342 | C | A | 0.6406  | 0.2529  | 0.4474  | PLCH1     |
| 3 | rs764129  | C | T | 0.07812 | 0.5988  | 0.25    | Non-genic |

|   |                |   |   |         |         |         |           |
|---|----------------|---|---|---------|---------|---------|-----------|
| 3 | rs7642017      | C | T | 0.2812  | 0.625   | 0.3333  | FHIT      |
| 3 | rs7646338      | A | G | 0       | 0.2326  | 0.05263 | TNIK      |
| 3 | rs765461       | G | T | 0.03125 | 0.3253  | 0.1579  | Non-genic |
| 3 | rs780373       | C | T | 0.3281  | 0.7683  | 0.3611  | Non-genic |
| 3 | rs784502       | G | A | 0.2031  | 0.5988  | 0.3158  | Non-genic |
| 3 | rs812368       | G | A | 0.5781  | 0.1829  | 0.4474  | ZXDC      |
| 3 | rs861092       | G | A | 0.6719  | 0.2733  | 0.4737  | Non-genic |
| 3 | rs9290864      | A | G | 0.1094  | 0.5529  | 0.2632  | Non-genic |
| 3 | rs9309886      | T | G | 0.5938  | 0.1341  | 0.4211  | Non-genic |
| 3 | rs9311046      | G | A | 0.1094  | 0.5952  | 0.1579  | Non-genic |
| 3 | rs9311149      | C | A | 0.3281  | 0.7791  | 0.3947  | EPM2AIP1  |
| 3 | rs9311542      | A | G | 0.1406  | 0.3171  | 0.2105  | Non-genic |
| 3 | rs934448       | T | C | 0.1406  | 0.4588  | 0.2368  | Non-genic |
| 3 | rs939832       | G | T | 0.625   | 0.175   | 0.4737  | Non-genic |
| 3 | rs940050       | T | C | 0.3125  | 0.8688  | 0.4167  | KCNAB1    |
| 3 | rs9422         | G | T | 0.1562  | 0.6395  | 0.2632  | MYLK      |
| 3 | rs953239       | C | A | 0.6406  | 0.2035  | 0.4444  | TRPC1     |
| 3 | rs953641       | G | A | 0.6094  | 0.1341  | 0.4412  | PLS1      |
| 3 | rs956053       | A | G | 0.01562 | 0.3631  | 0.1053  | Non-genic |
| 3 | rs958383       | T | C | 0.1562  | 0.6012  | 0.2632  | Non-genic |
| 3 | rs959132       | C | T | 0       | 0.4759  | 0.1579  | Non-genic |
| 3 | rs988987       | A | G | 0.03125 | 0.3605  | 0.1316  | Non-genic |
| 3 | rs1039673      | C | T | 0.7188  | 0.4103  | 0.3235  | CADPS     |
| 3 | rs1051024<br>3 | G | A | 0.375   | 0.09412 | 0.1053  | CNTN4     |
| 3 | rs1051057<br>7 | T | C | 0.5781  | 0.1529  | 0.25    | Non-genic |
| 3 | rs1051095<br>3 | G | A | 0.0625  | 0.4524  | 0.3421  | SLC25A26  |
| 3 | rs1051095<br>6 | C | T | 0.6406  | 0.06395 | 0.3421  | LRIG1     |
| 3 | rs1051119<br>4 | T | C | 0.375   | 0.1037  | 0.02632 | Non-genic |
| 3 | rs1051134<br>1 | C | T | 0.3594  | 0.07407 | 0.2105  | ZBTB20    |
| 3 | rs1051138<br>2 | G | T | 0.4062  | 0.125   | 0.1053  | B4GALT4   |
| 3 | rs1051263<br>6 | G | A | 0.3125  | 0.05814 | 0.1316  | SLC12A8   |
| 3 | rs1051311<br>1 | G | A | 0.3125  | 0.04651 | 0.07895 | CLSTN2    |
| 3 | rs1051370<br>3 | G | T | 0.09375 | 0.5357  | 0.3158  | Non-genic |
| 3 | rs1356609      | G | A | 0.03125 | 0.3623  | 0.3333  | Non-genic |
| 3 | rs1372555      | C | A | 0.0625  | 0.4881  | 0.3421  | KCNH8     |
| 3 | rs1387161      | C | T | 0.01562 | 0.4333  | 0.3     | Non-genic |
| 3 | rs1387870      | G | A | 0.1094  | 0.5529  | 0.3684  | Non-genic |
| 3 | rs1453262      | T | G | 0.4062  | 0.1337  | 0.2222  | COL6A5    |
| 3 | rs1470400      | C | A | 0.4062  | 0.07647 | 0.2105  | SEMA5B    |
| 3 | rs1478067      | T | C | 0.03125 | 0.3953  | 0.2368  | ZNF385D   |
| 3 | rs1485730      | G | T | 0.4844  | 0.04762 | 0.1389  | FHIT      |

|   |           |   |   |         |         |        |           |
|---|-----------|---|---|---------|---------|--------|-----------|
| 3 | rs1489024 | G | A | 0.7969  | 0.1824  | 0.4737 | Non-genic |
| 3 | rs1499498 | T | C | 0.5781  | 0.1205  | 0.1389 | MAGI1     |
| 3 | rs1500711 | C | T | 0.03125 | 0.4038  | 0.3667 | Non-genic |
| 3 | rs1502762 | G | A | 0.8125  | 0.2917  | 0.5    | MCCC1     |
| 3 | rs1504294 | T | G | 0.5312  | 0.1905  | 0.2895 | Non-genic |
| 3 | rs1565960 | A | G | 0.5     | 0.1392  | 0.3056 | ULK4      |
| 3 | rs1568983 | T | C | 0.4844  | 0.1294  | 0.2368 | CACNA2D3  |
| 3 | rs1581413 | C | T | 0.04688 | 0.5294  | 0.2895 | VEPH1     |
| 3 | rs1587672 | G | A | 0       | 0.2597  | 0.3571 | Non-genic |
| 3 | rs1598997 | C | T | 0.4062  | 0.08553 | 0.1471 | MYRIP     |
| 3 | rs161927  | G | A | 0.4667  | 0.1234  | 0.1471 | Non-genic |
| 3 | rs1844850 | G | A | 0.01562 | 0.5625  | 0.2895 | Non-genic |
| 3 | rs1846466 | G | T | 0.5781  | 0.1139  | 0.3235 | CNTN6     |
| 3 | rs1900860 | G | A | 0.01562 | 0.4605  | 0.4286 | SCHIP1    |
| 3 | rs1915337 | A | G | 0.03125 | 0.2071  | 0.3571 | Non-genic |
| 3 | rs1973804 | C | T | 0.1719  | 0.5647  | 0.3947 | Non-genic |
| 3 | rs1993802 | C | T | 0.7812  | 0.1802  | 0.3158 | Non-genic |
| 3 | rs1997463 | G | A | 0.7344  | 0.216   | 0.3421 | CACNA2D3  |
| 3 | rs2017409 | A | G | 0.5938  | 0.1529  | 0.2632 | Non-genic |
| 3 | rs2219779 | C | T | 0.01562 | 0.363   | 0.1944 | Non-genic |
| 3 | rs2263039 | C | T | 0.03125 | 0.5417  | 0.3158 | Non-genic |
| 3 | rs2289506 | T | C | 0       | 0.358   | 0.2632 | NIT2      |
| 3 | rs2352734 | C | T | 0.04688 | 0.4826  | 0.2895 | Non-genic |
| 3 | rs2360958 | T | C | 0.1562  | 0.6188  | 0.4737 | Non-genic |
| 3 | rs2360959 | C | A | 0.1562  | 0.6221  | 0.4737 | Non-genic |
| 3 | rs285317  | C | T | 0.7656  | 0.1908  | 0.2308 | Non-genic |
| 3 | rs285321  | A | C | 0.7344  | 0.1728  | 0.3929 | Non-genic |
| 3 | rs285322  | G | A | 0.7656  | 0.1588  | 0.3125 | Non-genic |
| 3 | rs300994  | A | G | 0.5312  | 0.0407  | 0.2105 | Non-genic |
| 3 | rs333335  | G | A | 0.1406  | 0.5523  | 0.3611 | KALRN     |
| 3 | rs350658  | G | A | 0.6406  | 0.2733  | 0.3421 | Non-genic |
| 3 | rs3773195 | A | G | 0       | 0.3608  | 0.2353 | ROBO1     |
| 3 | rs3849513 | T | C | 0.125   | 0.6628  | 0.4444 | Non-genic |
| 3 | rs3914117 | G | A | 0.2031  | 0.6447  | 0.4412 | Non-genic |
| 3 | rs39693   | C | A | 0.7344  | 0.314   | 0.3947 | Non-genic |
| 3 | rs4955768 | G | A | 0.4062  | 0.07927 | 0.1316 | TNIK      |
| 3 | rs524438  | A | G | 0.6406  | 0.2375  | 0.3684 | Non-genic |
| 3 | rs601032  | G | A | 0       | 0.3155  | 0.1842 | FAIM      |
| 3 | rs6419833 | C | A | 0.625   | 0.2849  | 0.4474 | ITGA9     |
| 3 | rs6782678 | T | G | 0.5781  | 0.09302 | 0.2105 | MAGI1     |
| 3 | rs6785590 | C | A | 0.5469  | 0.08025 | 0.1765 | Non-genic |
| 3 | rs717706  | A | C | 0.0625  | 0.4217  | 0.2895 | Non-genic |
| 3 | rs719278  | A | G | 0.09375 | 0.4398  | 0.3421 | EPHA6     |
| 3 | rs721912  | C | T | 0.2188  | 0.6706  | 0.4474 | TNIK      |
| 3 | rs727476  | T | G | 0.1875  | 0.6205  | 0.5    | FHIT      |
| 3 | rs727763  | G | A | 0       | 0.4186  | 0.2105 | Non-genic |
| 3 | rs792747  | C | T | 0.5156  | 0.175   | 0.3421 | Non-genic |
| 3 | rs853256  | G | A | 0.625   | 0.2055  | 0.25   | Non-genic |



|   |                |   |   |         |         |         |           |
|---|----------------|---|---|---------|---------|---------|-----------|
| 3 | rs918220       | G | A | 0.75    | 0.1512  | 0.4474  | DGKG      |
| 3 | rs9283631      | T | C | 0.375   | 0.08721 | 0.1579  | Non-genic |
| 3 | rs9289046      | C | T | 0.1094  | 0.5732  | 0.3684  | LSAMP     |
| 3 | rs9289047      | A | G | 0.09375 | 0.539   | 0.3684  | LSAMP     |
| 3 | rs9289152      | T | C | 0.7188  | 0.253   | 0.4474  | Non-genic |
| 3 | rs9311274      | C | T | 0.2031  | 0.5256  | 0.4737  | ULK4      |
| 3 | rs9311951      | G | T | 0.4531  | 0.1386  | 0.1842  | MAGI1     |
| 3 | rs935519       | A | G | 0.5312  | 0.1706  | 0.2895  | SLC9A9    |
| 3 | rs953479       | C | A | 0       | 0.2711  | 0.2647  | FHIT      |
| 3 | rs953480       | C | T | 0       | 0.2711  | 0.25    | FHIT      |
| 3 | rs959960       | T | C | 0.01562 | 0.5     | 0.2632  | Non-genic |
| 3 | rs960353       | T | C | 0.6875  | 0.3036  | 0.3421  | Non-genic |
| 3 | rs967331       | T | C | 0.5     | 0.2384  | 0.2368  | Non-genic |
| 3 | rs967963       | C | T | 0.125   | 0.5058  | 0.3421  | Non-genic |
| 4 | rs1352844      | T | C | 0.1719  | 0.2125  | 0.1842  | GC        |
| 4 | rs1897814      | T | C | 0.0625  | 0.4702  | 0.2059  | ADAMTS3   |
| 4 | rs4129733      | G | T | 0.01562 | 0.3571  | 0.1389  | NPFFR2    |
| 4 | rs972072       | T | G | 0.2969  | 0.628   | 0.2895  | GNRHR     |
| 4 | rs1051812<br>8 | G | T | 0.5312  | 0.1429  | 0.2632  | BTC       |
| 4 | rs6828922      | T | C | 0.6719  | 0.1159  | 0.3158  | GNRHR     |
| 4 | rs1008277      | C | T | 0.2188  | 0.5118  | 0.2895  | TEC       |
| 4 | rs1019947      | T | C | 0       | 0.2558  | 0.02632 | Non-genic |
| 4 | rs1036342      | G | A | 0.625   | 0.3059  | 0.4737  | Non-genic |
| 4 | rs1048885<br>3 | G | A | 0.5469  | 0.05233 | 0.3158  | Non-genic |
| 4 | rs1048896<br>8 | A | G | 0       | 0.1647  | 0.02632 | Non-genic |
| 4 | rs1048906<br>4 | A | C | 0.625   | 0.1919  | 0.4118  | Non-genic |
| 4 | rs1048906<br>6 | A | G | 0.4219  | 0.02326 | 0.3158  | Non-genic |
| 4 | rs1048908<br>5 | A | G | 0       | 0.3779  | 0.1053  | Non-genic |
| 4 | rs1051625<br>9 | T | C | 0.25    | 0.48    | 0.25    | Non-genic |
| 4 | rs1051631<br>8 | T | G | 0.7031  | 0.2048  | 0.4737  | Non-genic |
| 4 | rs1051644<br>1 | A | G | 0       | 0.2866  | 0.08824 | Non-genic |
| 4 | rs1051654<br>6 | A | G | 0.2969  | 0.7222  | 0.4737  | Non-genic |
| 4 | rs1051666<br>8 | G | A | 0.4688  | 0.75    | 0.4211  | Non-genic |
| 4 | rs1051667<br>4 | C | T | 0.4688  | 0.08721 | 0.2895  | ENOPH1    |
| 4 | rs1051668<br>3 | G | A | 0.25    | 0.8256  | 0.4211  | Non-genic |
| 4 | rs1051682<br>7 | T | C | 0       | 0.1686  | 0.05263 | FAM13A    |
| 4 | rs1051685<br>8 | A | G | 0.01562 | 0.3951  | 0.1053  | Non-genic |

|   |            |   |   |         |          |         |           |
|---|------------|---|---|---------|----------|---------|-----------|
| 4 | rs10516905 | G | A | 0.3594  | 0.06024  | 0.2368  | Non-genic |
| 4 | rs10516963 | T | C | 0.09375 | 0.4167   | 0.2105  | UNC5C     |
| 4 | rs10517099 | A | C | 0.2188  | 0.01744  | 0.1842  | Non-genic |
| 4 | rs10517161 | G | A | 0.1875  | 0.4819   | 0.2632  | Non-genic |
| 4 | rs10517309 | T | C | 0.01562 | 0.7338   | 0.3611  | Non-genic |
| 4 | rs10517676 | C | T | 0.04688 | 0.7558   | 0.3947  | Non-genic |
| 4 | rs10517809 | C | T | 0.4844  | 0.04878  | 0.3889  | Non-genic |
| 4 | rs10517923 | A | G | 0.04688 | 0.4578   | 0.25    | Non-genic |
| 4 | rs10518470 | G | A | 0       | 0.247    | 0.05263 | Non-genic |
| 4 | rs10518628 | C | T | 0.09375 | 0.6027   | 0.1875  | Non-genic |
| 4 | rs10519397 | A | C | 0       | 0.2051   | 0.07692 | Non-genic |
| 4 | rs1072389  | T | C | 0.01562 | 0.3824   | 0.1579  | MTHFD2L   |
| 4 | rs1154956  | A | G | 0.4844  | 0.1765   | 0.4737  | Non-genic |
| 4 | rs1160368  | G | A | 0.3281  | 0.6882   | 0.4737  | Non-genic |
| 4 | rs12644496 | C | T | 0.1406  | 0.6829   | 0.3947  | SH3D19    |
| 4 | rs1328925  | T | C | 0.1875  | 0.7151   | 0.2895  | Non-genic |
| 4 | rs1344017  | A | G | 0.5781  | 0.2083   | 0.4474  | Non-genic |
| 4 | rs1364831  | G | T | 0.5156  | 0.1914   | 0.4444  | Non-genic |
| 4 | rs1369353  | C | T | 0.3906  | 0.7651   | 0.4118  | LNX1      |
| 4 | rs1375989  | G | T | 0.04688 | 0.3704   | 0.1316  | Non-genic |
| 4 | rs1380000  | T | G | 0.2031  | 0.525    | 0.1579  | Non-genic |
| 4 | rs1387993  | G | A | 0.01562 | 0.5407   | 0.1579  | Non-genic |
| 4 | rs1394999  | T | G | 0.125   | 0.6883   | 0.3235  | Non-genic |
| 4 | rs1395477  | T | C | 0.2344  | 0.6118   | 0.2105  | Non-genic |
| 4 | rs1400772  | C | T | 0       | 0.253    | 0.08333 | PROM1     |
| 4 | rs1401535  | T | C | 0       | 0.4313   | 0.1579  | Non-genic |
| 4 | rs1441716  | C | T | 0.125   | 0.2798   | 0.05263 | Non-genic |
| 4 | rs1459744  | T | C | 0.4531  | 0.006173 | 0.3421  | DCLK2     |
| 4 | rs1466516  | C | T | 0.1719  | 0.4702   | 0.1579  | Non-genic |
| 4 | rs1480303  | G | A | 0.5625  | 0.09146  | 0.3421  | Non-genic |
| 4 | rs1483748  | A | G | 0       | 0.3155   | 0.1389  | UNC5C     |
| 4 | rs1510791  | T | C | 0.3281  | 0.5897   | 0.2812  | Non-genic |
| 4 | rs1512970  | T | C | 0.07812 | 0.4821   | 0.1842  | Non-genic |
| 4 | rs1532358  | A | G | 0.3906  | 0.7733   | 0.3947  | Non-genic |
| 4 | rs1545330  | C | T | 0.125   | 0.5723   | 0.2368  | Non-genic |
| 4 | rs1567396  | G | A | 0.4062  | 0.7824   | 0.4474  | Non-genic |
| 4 | rs1596248  | C | T | 0.2656  | 0.7805   | 0.4211  | Non-genic |
| 4 | rs1843486  | T | G | 0.4531  | 0.04268  | 0.3684  | Non-genic |
| 4 | rs1874238  | A | C | 0.5     | 0.1026   | 0.3421  | Non-genic |

|   |           |   |   |         |         |         |           |
|---|-----------|---|---|---------|---------|---------|-----------|
| 4 | rs1878989 | T | C | 0.03125 | 0.3875  | 0.05556 | Non-genic |
| 4 | rs1880716 | A | G | 0       | 0.5116  | 0.2368  | SCD5      |
| 4 | rs1986432 | G | A | 0.3594  | 0.7222  | 0.4722  | Non-genic |
| 4 | rs1995960 | A | G | 0.03125 | 0.537   | 0.1667  | Non-genic |
| 4 | rs1996886 | T | C | 0.3906  | 0.7831  | 0.4737  | Non-genic |
| 4 | rs2036153 | A | C | 0.01562 | 0.6012  | 0.2632  | FAM190A   |
| 4 | rs2089509 | A | G | 0.25    | 0.5465  | 0.3421  | TEC       |
| 4 | rs2089510 | G | T | 0.5156  | 0.1919  | 0.3947  | TEC       |
| 4 | rs2114009 | T | C | 0.3594  | 0.7531  | 0.4474  | Non-genic |
| 4 | rs2135615 | A | C | 0.0625  | 0.4412  | 0.1579  | Non-genic |
| 4 | rs2163276 | C | T | 0.01562 | 0.2202  | 0.07895 | TMEM156   |
| 4 | rs2200257 | A | G | 0.5156  | 0.1667  | 0.3421  | GALNTL6   |
| 4 | rs2284659 | G | T | 0.03125 | 0.494   | 0.2105  | Non-genic |
| 4 | rs230     | C | T | 0.1094  | 0.631   | 0.3611  | GALNTL6   |
| 4 | rs2320331 | T | C | 0.3125  | 0.7941  | 0.4722  | Non-genic |
| 4 | rs2333251 | T | C | 0.3594  | 0.7849  | 0.4737  | GPM6A     |
| 4 | rs2345275 | T | C | 0.01562 | 0.7722  | 0.3421  | Non-genic |
| 4 | rs2389508 | T | C | 0.5156  | 0.05357 | 0.3611  | NDST3     |
| 4 | rs2406756 | A | G | 0.1562  | 0.5291  | 0.2778  | Non-genic |
| 4 | rs2420161 | T | C | 0.4531  | 0.7529  | 0.3684  | Non-genic |
| 4 | rs242596  | T | C | 0.6406  | 0.936   | 0.4737  | EMCN      |
| 4 | rs2472649 | G | A | 0.0625  | 0.7321  | 0.2895  | Non-genic |
| 4 | rs2627813 | T | C | 0.03125 | 0.4588  | 0.2368  | INPP4B    |
| 4 | rs2635429 | T | C | 0       | 0.4176  | 0.1579  | INPP4B    |
| 4 | rs2653824 | C | T | 0.5968  | 0.1296  | 0.4737  | GALNTL6   |
| 4 | rs298924  | A | C | 0.4375  | 0.7798  | 0.3684  | Non-genic |
| 4 | rs309770  | A | G | 0.3281  | 0.06548 | 0.2368  | Non-genic |
| 4 | rs3108397 | A | G | 0.25    | 0.6471  | 0.3158  | Non-genic |
| 4 | rs354875  | A | G | 0.4062  | 0.03529 | 0.2895  | STAP1     |
| 4 | rs355689  | T | C | 0.4375  | 0.8293  | 0.4737  | CXCL13    |
| 4 | rs3860691 | A | G | 0       | 0.3916  | 0.1389  | Non-genic |
| 4 | rs3923243 | T | C | 0.2188  | 0.6294  | 0.3421  | Non-genic |
| 4 | rs3924787 | T | C | 0.1406  | 0.5476  | 0.2632  | Non-genic |
| 4 | rs4128296 | C | T | 0.04688 | 0.3953  | 0.1053  | Non-genic |
| 4 | rs4129319 | T | C | 0.5625  | 0.2118  | 0.4474  | SPARCL1   |
| 4 | rs4132743 | C | T | 0.1562  | 0.6807  | 0.2895  | Non-genic |
| 4 | rs4690816 | C | T | 0.6094  | 0.08442 | 0.4412  | CPE       |
| 4 | rs4692931 | T | C | 0.03125 | 0.5     | 0.1316  | DDX60L    |
| 4 | rs516224  | G | A | 0.125   | 0.7     | 0.3889  | Non-genic |
| 4 | rs6532197 | G | A | 0.3906  | 0.08642 | 0.2778  | Non-genic |
| 4 | rs6552560 | T | C | 0.4062  | 0.06395 | 0.3684  | ODZ3      |
| 4 | rs6553603 | A | G | 0.5156  | 0.1964  | 0.4737  | GALNTL6   |
| 4 | rs6820369 | G | A | 0.6094  | 0.1131  | 0.4474  | UNC5C     |
| 4 | rs6829573 | G | A | 0.03125 | 0.2647  | 0.05556 | Non-genic |
| 4 | rs6855004 | G | A | 0.2188  | 0.6901  | 0.4167  | Non-genic |
| 4 | rs717253  | C | T | 0.3438  | 0.6706  | 0.3056  | Non-genic |
| 4 | rs720257  | G | A | 0.2344  | 0.8274  | 0.4722  | Non-genic |
| 4 | rs726111  | A | G | 0.01562 | 0.5765  | 0.2895  | Non-genic |

|   |                |   |   |         |         |         |           |
|---|----------------|---|---|---------|---------|---------|-----------|
| 4 | rs728170       | C | T | 0       | 0.4157  | 0.1316  | Non-genic |
| 4 | rs751104       | T | G | 0.01562 | 0.4353  | 0.2105  | Non-genic |
| 4 | rs7657187      | C | T | 0.4062  | 0.01829 | 0.2368  | Non-genic |
| 4 | rs7658517      | C | T | 0.4844  | 0.2115  | 0.4167  | Non-genic |
| 4 | rs7658791      | A | C | 0.04688 | 0.3642  | 0.1944  | Non-genic |
| 4 | rs7668405      | G | A | 0.1562  | 0.6369  | 0.3158  | Non-genic |
| 4 | rs7670292      | A | G | 0.6562  | 0.1453  | 0.4211  | DCLK2     |
| 4 | rs7673537      | C | T | 0.1562  | 0.7151  | 0.4167  | Non-genic |
| 4 | rs7678820      | C | T | 0.4688  | 0.07738 | 0.3421  | Non-genic |
| 4 | rs7679666      | G | A | 0.01562 | 0.4634  | 0.2368  | Non-genic |
| 4 | rs7692514      | A | G | 0.2188  | 0.1076  | 0.4118  | Non-genic |
| 4 | rs883617       | G | A | 0.4219  | 0.1402  | 0.4474  | Non-genic |
| 4 | rs890597       | G | A | 0.04688 | 0.1948  | 0.1176  | Non-genic |
| 4 | rs921113       | A | C | 0.8125  | 0.1143  | 0.4722  | ARHGEF38  |
| 4 | rs9307261      | A | G | 0.5     | 0.2012  | 0.4211  | Non-genic |
| 4 | rs9307579      | A | C | 0.09375 | 0.2067  | 0.06667 | Non-genic |
| 4 | rs9312517      | G | A | 0.2969  | 0.01744 | 0.1842  | SPOCK3    |
| 4 | rs9328764      | A | G | 0.5625  | 0.1941  | 0.4737  | POLN      |
| 4 | rs950950       | C | T | 0.07812 | 0.5118  | 0.2368  | Non-genic |
| 4 | rs951085       | T | G | 0.3281  | 0.7045  | 0.3214  | Non-genic |
| 4 | rs951530       | C | T | 0.1719  | 0.506   | 0.3158  | Non-genic |
| 4 | rs984696       | T | C | 0.125   | 0.4815  | 0.2222  | TTC29     |
| 4 | rs1037644      | A | G | 0.4531  | 0.1163  | 0.1842  | Non-genic |
| 4 | rs1048421<br>4 | T | C | 0.1406  | 0.5581  | 0.4737  | Non-genic |
| 4 | rs1048882<br>9 | G | A | 0.5625  | 0.1012  | 0.1579  | Non-genic |
| 4 | rs1048886<br>4 | A | G | 0.5781  | 0.08434 | 0.2368  | Non-genic |
| 4 | rs1048886<br>5 | T | C | 0.3438  | 0.1543  | 0.1944  | Non-genic |
| 4 | rs1048895<br>9 | C | T | 0.5938  | 0.1084  | 0.1316  | CAMK2D    |
| 4 | rs1048902<br>7 | G | A | 0.1562  | 0.4824  | 0.3947  | Non-genic |
| 4 | rs1049431<br>7 | T | C | 0.8387  | 0.5882  | 0.5     | Non-genic |
| 4 | rs1051617<br>0 | T | C | 0.2969  | 0.0814  | 0.08824 | Non-genic |
| 4 | rs1051631<br>9 | G | T | 0.3125  | 0.07143 | 0.1579  | Non-genic |
| 4 | rs1051669<br>6 | A | G | 0.7031  | 0.1037  | 0.3056  | Non-genic |
| 4 | rs1051674<br>8 | C | T | 0.75    | 0.2025  | 0.4737  | Non-genic |
| 4 | rs1051677<br>0 | A | C | 0.5312  | 0.1341  | 0.1316  | MAPK10    |
| 4 | rs1051685<br>3 | T | C | 0.625   | 0.05    | 0.2917  | MMRN1     |
| 4 | rs1051688<br>6 | T | C | 0.04688 | 0.3875  | 0.2188  | Non-genic |
| 4 | rs1051704      | C | T | 0.625   | 0.2289  | 0.4211  | Non-genic |

|   |                |   |   |         |         |        |           |
|---|----------------|---|---|---------|---------|--------|-----------|
|   | 8              |   |   |         |         |        |           |
| 4 | rs1051714<br>4 | G | T | 0       | 0.2697  | 0.1471 | Non-genic |
| 4 | rs1051727<br>2 | T | G | 0.4219  | 0.07558 | 0.1316 | Non-genic |
| 4 | rs1051731<br>3 | G | A | 0.75    | 0.1386  | 0.3889 | Non-genic |
| 4 | rs1051732<br>4 | A | G | 0.04688 | 0.3571  | 0.3056 | Non-genic |
| 4 | rs1051740<br>7 | C | A | 0       | 0.3333  | 0.1842 | Non-genic |
| 4 | rs1051743<br>5 | C | T | 0.75    | 0.2831  | 0.4211 | Non-genic |
| 4 | rs1051754<br>9 | G | T | 0.1406  | 0.4231  | 0.3947 | LPHN3     |
| 4 | rs1051759<br>6 | T | C | 0.5781  | 0.2024  | 0.2895 | Non-genic |
| 4 | rs1051765<br>5 | C | T | 0.07812 | 0.4615  | 0.3158 | PDGFC     |
| 4 | rs1051780<br>0 | T | C | 0.5312  | 0.1588  | 0.1053 | Non-genic |
| 4 | rs1051781<br>0 | A | C | 0.7969  | 0.1951  | 0.4444 | Non-genic |
| 4 | rs1051788<br>4 | G | A | 0.1719  | 0.7024  | 0.5    | TECRL     |
| 4 | rs1051789<br>9 | T | C | 0.1875  | 0.5465  | 0.3684 | Non-genic |
| 4 | rs1051800<br>6 | T | C | 0.7188  | 0.3434  | 0.4    | PALLD     |
| 4 | rs1051814<br>2 | T | G | 0       | 0.4302  | 0.3158 | NAAA      |
| 4 | rs1051817<br>0 | G | A | 0.4062  | 0.08929 | 0.2222 | Non-genic |
| 4 | rs1051821<br>1 | T | C | 0       | 0.3471  | 0.2353 | Non-genic |
| 4 | rs1051821<br>4 | C | T | 0.75    | 0.1131  | 0.4211 | Non-genic |
| 4 | rs1051850<br>2 | G | T | 0       | 0.2857  | 0.2105 | Non-genic |
| 4 | rs1051937<br>1 | G | T | 0.1406  | 0.4744  | 0.4444 | Non-genic |
| 4 | rs1051942<br>5 | A | G | 0.5156  | 0.06548 | 0.2895 | Non-genic |
| 4 | rs1052010<br>1 | G | A | 0.7167  | 0.3313  | 0.4737 | SH3D19    |
| 4 | rs1052010<br>2 | G | A | 0.7031  | 0.3434  | 0.4737 | SH3D19    |
| 4 | rs1052025<br>5 | T | C | 0.5781  | 0.2095  | 0.3333 | GALNT7    |
| 4 | rs1052027<br>3 | C | T | 0.2344  | 0.6173  | 0.4737 | Non-genic |
| 4 | rs1052050<br>1 | T | G | 0.1094  | 0.4882  | 0.3421 | Non-genic |
| 4 | rs1112857      | C | T | 0.01562 | 0.3869  | 0.2895 | Non-genic |

|   |           |   |   |         |         |        |           |
|---|-----------|---|---|---------|---------|--------|-----------|
| 4 | rs1350027 | A | G | 0.0625  | 0.4096  | 0.2632 | Non-genic |
| 4 | rs1353624 | T | C | 0       | 0.3544  | 0.3158 | INPP4B    |
| 4 | rs1372156 | C | A | 0.8594  | 0.256   | 0.3947 | Non-genic |
| 4 | rs1380163 | G | A | 0.4375  | 0.0407  | 0.1562 | SYNPO2    |
| 4 | rs1388935 | C | T | 0.6875  | 0.3081  | 0.3947 | ZFP42     |
| 4 | rs1390994 | G | A | 0.03125 | 0.7857  | 0.4737 | INPP4B    |
| 4 | rs1442173 | T | C | 0.6562  | 0.2083  | 0.3529 | Non-genic |
| 4 | rs1490579 | G | A | 0.4844  | 0.02941 | 0.1111 | Non-genic |
| 4 | rs1501158 | C | A | 0.09375 | 0.5176  | 0.3684 | Non-genic |
| 4 | rs1514733 | T | C | 0.5938  | 0.2176  | 0.3158 | FAM190A   |
| 4 | rs1516689 | A | G | 0.6406  | 0.2733  | 0.3684 | Non-genic |
| 4 | rs1546716 | G | A | 0.8281  | 0.1802  | 0.3158 | MAML3     |
| 4 | rs178724  | G | A | 0.0625  | 0.5588  | 0.4211 | SGCB      |
| 4 | rs1808870 | C | A | 0.5938  | 0.2338  | 0.2667 | Non-genic |
| 4 | rs1897763 | T | C | 0.4844  | 0.1173  | 0.2778 | Non-genic |
| 4 | rs1898593 | T | G | 0.4688  | 0.1325  | 0.1667 | CPE       |
| 4 | rs2046463 | G | A | 0.8281  | 0.2262  | 0.3947 | VEGFC     |
| 4 | rs2071486 | T | C | 0.75    | 0.3256  | 0.4474 | CCNA2     |
| 4 | rs207699  | A | C | 0.5938  | 0.08333 | 0.3056 | LDB2      |
| 4 | rs2129267 | T | C | 0.7031  | 0.4036  | 0.2895 | Non-genic |
| 4 | rs2132339 | G | A | 0.5625  | 0.0814  | 0.2895 | GPM6A     |
| 4 | rs2221618 | T | C | 0.2969  | 0.6471  | 0.4737 | Non-genic |
| 4 | rs2251152 | A | G | 0.1719  | 0.6047  | 0.5    | Non-genic |
| 4 | rs2310357 | T | C | 0.7969  | 0.2326  | 0.3684 | SORBS2    |
| 4 | rs2358469 | A | G | 0.1094  | 0.4762  | 0.3333 | Non-genic |
| 4 | rs2457996 | C | T | 0.5     | 0.08333 | 0.2105 | Non-genic |
| 4 | rs2588907 | G | A | 0.7812  | 0.3294  | 0.4474 | Non-genic |
| 4 | rs2589506 | C | T | 0.6875  | 0.3588  | 0.5    | MAPK10    |
| 4 | rs2611162 | T | C | 0.1406  | 0.5584  | 0.4211 | Non-genic |
| 4 | rs2632412 | G | T | 0       | 0.3471  | 0.25   | SMARCAD1  |
| 4 | rs2643036 | C | T | 0.7188  | 0.3412  | 0.2632 | Non-genic |
| 4 | rs2720354 | A | G | 0.6562  | 0.2442  | 0.3684 | CLNK      |
| 4 | rs2874465 | C | T | 0.3438  | 0.09036 | 0.1579 | Non-genic |
| 4 | rs2889188 | G | A | 0.5     | 0.1512  | 0.2632 | Non-genic |
| 4 | rs2889361 | A | G | 0.375   | 0.1     | 0.1842 | Non-genic |
| 4 | rs303084  | G | A | 0.7812  | 0.25    | 0.3684 | SPATA5    |
| 4 | rs303096  | G | A | 0.9375  | 0.4762  | 0.4737 | SPATA5    |
| 4 | rs309753  | C | A | 0.04688 | 0.3081  | 0.2632 | Non-genic |
| 4 | rs335271  | A | G | 0.4688  | 0.1667  | 0.1944 | LPHN3     |
| 4 | rs335273  | C | T | 0.6094  | 0.1481  | 0.2188 | Non-genic |
| 4 | rs336384  | T | C | 0.7969  | 0.26    | 0.3824 | INPP4B    |
| 4 | rs4077725 | A | G | 0.625   | 0.1744  | 0.3421 | Non-genic |
| 4 | rs4128567 | T | C | 0.6719  | 0.2824  | 0.4211 | CLNK      |
| 4 | rs4128643 | G | A | 0.03125 | 0.3896  | 0.2353 | Non-genic |
| 4 | rs4129288 | T | C | 0.03125 | 0.2965  | 0.2368 | CXXC4     |
| 4 | rs420934  | A | G | 0.6875  | 0.2744  | 0.3611 | Non-genic |
| 4 | rs4487344 | G | A | 0.09375 | 0.5549  | 0.3684 | Non-genic |
| 4 | rs4689118 | T | C | 0.01562 | 0.4744  | 0.25   | STX18     |

|   |                |   |   |         |         |         |           |
|---|----------------|---|---|---------|---------|---------|-----------|
| 4 | rs530174       | C | T | 0       | 0.4467  | 0.2778  | Non-genic |
| 4 | rs6532253      | G | A | 0.7188  | 0.2619  | 0.4211  | Non-genic |
| 4 | rs6533603      | T | C | 0.09375 | 0.6905  | 0.5     | ALPK1     |
| 4 | rs6812005      | G | A | 0       | 0.3841  | 0.2059  | PCDH7     |
| 4 | rs6826593      | T | C | 0.6719  | 0.375   | 0.2895  | Non-genic |
| 4 | rs6836062      | A | G | 0.7812  | 0.2882  | 0.4474  | Non-genic |
| 4 | rs6837953      | A | G | 0.5     | 0.1627  | 0.2222  | Non-genic |
| 4 | rs6845554      | T | G | 0.625   | 0.25    | 0.3158  | SLC2A9    |
| 4 | rs6850284      | A | G | 0.625   | 0.1205  | 0.3684  | Non-genic |
| 4 | rs6851470      | T | C | 0.7188  | 0.2059  | 0.4444  | Non-genic |
| 4 | rs6852823      | G | A | 0.6094  | 0.2099  | 0.2353  | Non-genic |
| 4 | rs6854960      | T | C | 0.5938  | 0.1235  | 0.3158  | FSTL5     |
| 4 | rs717531       | C | T | 0.01562 | 0.5556  | 0.3125  | KCNIP4    |
| 4 | rs720485       | C | A | 0.01562 | 0.512   | 0.3125  | Non-genic |
| 4 | rs725264       | C | T | 0.5469  | 0.157   | 0.2368  | Non-genic |
| 4 | rs725882       | G | A | 0.1406  | 0.6905  | 0.4167  | Non-genic |
| 4 | rs7655676      | A | G | 0.0625  | 0.3988  | 0.2895  | Non-genic |
| 4 | rs7666980      | G | A | 0       | 0.3467  | 0.1765  | Non-genic |
| 4 | rs7673719      | G | A | 0.1875  | 0.631   | 0.5     | Non-genic |
| 4 | rs7686344      | G | A | 0.625   | 0.2372  | 0.2105  | Non-genic |
| 4 | rs9291219      | C | T | 0.75    | 0.3036  | 0.4474  | ATP8A1    |
| 4 | rs9291503      | C | T | 0.1562  | 0.6667  | 0.4211  | Non-genic |
| 4 | rs9291645      | A | G | 0.625   | 0.06962 | 0.2895  | SLC2A9    |
| 4 | rs9312059      | A | G | 0.5938  | 0.1364  | 0.2895  | Non-genic |
| 4 | rs9312227      | G | T | 0.4062  | 0.08861 | 0.1579  | Non-genic |
| 4 | rs9312489      | A | C | 0.6875  | 0.2381  | 0.4474  | Non-genic |
| 4 | rs9312490      | G | A | 0.5625  | 0.1024  | 0.2895  | Non-genic |
| 4 | rs950882       | C | T | 0.7031  | 0.2095  | 0.4412  | Non-genic |
| 4 | rs951252       | A | G | 0.09375 | 0.4884  | 0.4737  | Non-genic |
| 4 | rs953797       | A | G | 0.629   | 0.2679  | 0.3684  | Non-genic |
| 4 | rs979022       | T | C | 0.125   | 0.5188  | 0.4118  | Non-genic |
| 5 | rs1051613<br>2 | G | A | 0.2969  | 0.7733  | 0.3158  | CPLX2     |
| 5 | rs1463747      | T | G | 0.01562 | 0.3869  | 0.1944  | GRIA1     |
| 5 | rs3850733      | A | C | 0.3281  | 0.04651 | 0.2105  | GABRB2    |
| 5 | rs9325031      | C | A | 0.5938  | 0.8232  | 0.4474  | PPP2R2B   |
| 5 | rs1368387      | A | G | 0.3906  | 0.1     | 0.2059  | HTR4      |
| 5 | rs6896733      | T | C | 0.7031  | 0.2619  | 0.4211  | GABRB2    |
| 5 | rs1546221      | A | G | 0       | 0.1471  | 0.05263 | PDE4D     |
| 5 | rs298045       | C | T | 0.2812  | 0.05294 | 0.07895 | PDE4D     |
| 5 | rs1051999<br>4 | T | C | 0.2188  | 0.05952 | 0.05556 | FBN2      |
| 5 | rs190450       | A | G | 0.4531  | 0.1456  | 0.1667  | FBN2      |
| 5 | rs1008661      | G | A | 0.5312  | 0.1012  | 0.3611  | MAN2A1    |
| 5 | rs1022040      | C | A | 0.6406  | 0.1412  | 0.4474  | Non-genic |
| 5 | rs1031423      | T | C | 0.6406  | 0.1296  | 0.3889  | FAM172A   |
| 5 | rs1035496      | C | T | 0.03125 | 0.3563  | 0.1053  | Non-genic |
| 5 | rs1049123<br>7 | C | T | 0.5625  | 0.1686  | 0.3684  | Non-genic |

|   |                |   |   |         |         |         |           |
|---|----------------|---|---|---------|---------|---------|-----------|
| 5 | rs1049139<br>9 | A | G | 0.01562 | 0.3855  | 0.1579  | Non-genic |
| 5 | rs1049146<br>7 | G | A | 0.1875  | 0.2536  | 0.1667  | Non-genic |
| 5 | rs1051262<br>5 | C | T | 0.3438  | 0.07059 | 0.2105  | SPEF2     |
| 5 | rs1051273<br>4 | G | A | 0.1406  | 0.4651  | 0.2105  | Non-genic |
| 5 | rs1051278<br>1 | C | T | 0.04688 | 0.369   | 0.1667  | Non-genic |
| 5 | rs1051296<br>9 | C | A | 0.04688 | 0.3812  | 0.1111  | Non-genic |
| 5 | rs1051302<br>4 | A | C | 0       | 0.3547  | 0.07895 | ARL15     |
| 5 | rs1051314<br>6 | G | A | 0.0625  | 0.1463  | 0       | Non-genic |
| 5 | rs1051431<br>6 | G | A | 0.4062  | 0.0679  | 0.2895  | Non-genic |
| 5 | rs1051431<br>7 | T | C | 0       | 0.2171  | 0.05882 | Non-genic |
| 5 | rs1051544<br>9 | T | C | 0.5469  | 0.1353  | 0.4444  | REEP5     |
| 5 | rs1051554<br>9 | G | A | 0.09375 | 0.3951  | 0.1176  | Non-genic |
| 5 | rs1051562<br>6 | A | G | 0       | 0.378   | 0.1053  | AFAP1L1   |
| 5 | rs1051564<br>1 | A | G | 0       | 0.1765  | 0       | Non-genic |
| 5 | rs1051567<br>4 | A | G | 0       | 0.1747  | 0       | Non-genic |
| 5 | rs1051576<br>9 | A | G | 0.0625  | 0.3519  | 0.1579  | Non-genic |
| 5 | rs1051579<br>3 | T | C | 0.1406  | 0.5174  | 0.2632  | Non-genic |
| 5 | rs1051587<br>1 | A | G | 0.4688  | 0.7949  | 0.4706  | Non-genic |
| 5 | rs1051614<br>6 | G | A | 0.2656  | 0.7151  | 0.2632  | MAML1     |
| 5 | rs1051614<br>7 | G | A | 0.03125 | 0.3488  | 0.1579  | Non-genic |
| 5 | rs1051615<br>6 | A | C | 0       | 0.3706  | 0.1579  | PCDHB15   |
| 5 | rs1052098<br>7 | C | T | 0.3438  | 0.6807  | 0.4474  | C5orf22   |
| 5 | rs1156684      | T | G | 0.5     | 0.5743  | 0.3     | Non-genic |
| 5 | rs1371810      | T | C | 0.1719  | 0.5412  | 0.1842  | Non-genic |
| 5 | rs1394631      | T | C | 0.0625  | 0.4059  | 0.1316  | TNFAIP8   |
| 5 | rs1431948      | G | A | 0.09375 | 0.8228  | 0.3529  | Non-genic |
| 5 | rs1438675      | C | T | 0.01562 | 0.4226  | 0.2105  | Non-genic |
| 5 | rs1459193      | G | A | 0.1094  | 0.241   | 0.1316  | Non-genic |
| 5 | rs1469684      | A | G | 0.03125 | 0.2849  | 0.07895 | SLC36A3   |
| 5 | rs1478491      | C | T | 0.5     | 0.07927 | 0.3421  | Non-genic |
| 5 | rs1504976      | A | G | 0.5625  | 0.09036 | 0.3889  | TNFAIP8   |



|   |           |   |   |         |         |         |           |
|---|-----------|---|---|---------|---------|---------|-----------|
| 5 | rs1512508 | T | C | 0.3281  | 0.0241  | 0.3158  | SEMA5A    |
| 5 | rs152120  | T | C | 0.2969  | 0.5793  | 0.2941  | MEGF10    |
| 5 | rs1527822 | G | A | 0.03125 | 0.4036  | 0.05556 | Non-genic |
| 5 | rs153264  | T | C | 0.2031  | 0.6882  | 0.3684  | Non-genic |
| 5 | rs1533014 | T | C | 0.2344  | 0.7134  | 0.4722  | OXCT1     |
| 5 | rs1554624 | G | A | 0.7188  | 0.07558 | 0.4211  | EPB41L4A  |
| 5 | rs1559578 | C | T | 0.1094  | 0.5118  | 0.2105  | Non-genic |
| 5 | rs163810  | T | C | 0.4688  | 0.1105  | 0.4474  | Non-genic |
| 5 | rs165095  | A | C | 0.125   | 0.4702  | 0.2105  | TRIO      |
| 5 | rs179171  | T | C | 0.3906  | 0.7384  | 0.4211  | Non-genic |
| 5 | rs1807912 | G | A | 0.09375 | 0.5291  | 0.2368  | Non-genic |
| 5 | rs1816235 | C | T | 0.5156  | 0.1047  | 0.4722  | ADAMTS16  |
| 5 | rs1818061 | G | T | 0.3125  | 0.6176  | 0.2632  | Non-genic |
| 5 | rs1830362 | G | A | 0.1719  | 0.6071  | 0.3333  | Non-genic |
| 5 | rs1833681 | G | A | 0.5781  | 0.157   | 0.4737  | YTHDC2    |
| 5 | rs1839508 | A | G | 0       | 0.5192  | 0.05556 | Non-genic |
| 5 | rs1852730 | T | C | 0.01562 | 0.4939  | 0.2368  | Non-genic |
| 5 | rs1899949 | G | T | 0.1094  | 0.7317  | 0.3947  | Non-genic |
| 5 | rs1946289 | A | G | 0.6094  | 0.2378  | 0.4737  | ADAMTS19  |
| 5 | rs1991488 | C | A | 0.4219  | 0.4337  | 0.25    | Non-genic |
| 5 | rs2008927 | T | C | 0.09375 | 0.4942  | 0.2222  | Non-genic |
| 5 | rs2024079 | C | T | 0.3438  | 0.6845  | 0.25    | Non-genic |
| 5 | rs2112498 | C | T | 0.0625  | 0.3889  | 0.1667  | Non-genic |
| 5 | rs224938  | T | C | 0.2812  | 0.7616  | 0.5     | Non-genic |
| 5 | rs2259307 | T | C | 0.4688  | 0.1647  | 0.4737  | Non-genic |
| 5 | rs2329548 | A | G | 0.5312  | 0.1647  | 0.3947  | Non-genic |
| 5 | rs2338216 | T | C | 0.1719  | 0.5523  | 0.3421  | Non-genic |
| 5 | rs2352069 | G | A | 0.09375 | 0.5128  | 0.2895  | Non-genic |
| 5 | rs2406905 | G | T | 0.2344  | 0.5291  | 0.1842  | Non-genic |
| 5 | rs251169  | A | G | 0.1719  | 0.5407  | 0.3421  | Non-genic |
| 5 | rs259065  | A | G | 0.3594  | 0.7917  | 0.5     | Non-genic |
| 5 | rs26521   | T | C | 0       | 0.321   | 0.05263 | PPIP5K2   |
| 5 | rs26566   | C | T | 0.4219  | 0.04118 | 0.3158  | Non-genic |
| 5 | rs2662258 | T | G | 0.01562 | 0.3953  | 0.07895 | RGMB      |
| 5 | rs268542  | C | A | 0.1875  | 0.5793  | 0.3421  | SEMA5A    |
| 5 | rs26956   | A | C | 0.03125 | 0.5     | 0.2368  | Non-genic |
| 5 | rs27246   | A | G | 0.03125 | 0.407   | 0.2105  | Non-genic |
| 5 | rs27363   | C | T | 0.01562 | 0.3675  | 0.1667  | Non-genic |
| 5 | rs27566   | G | A | 0.01562 | 0.6395  | 0.2105  | MCC       |
| 5 | rs27761   | A | G | 0.1875  | 0.6395  | 0.3947  | TRIO      |
| 5 | rs28182   | A | G | 0.4219  | 0.8214  | 0.5     | Non-genic |
| 5 | rs2937536 | C | A | 0.09375 | 0.7329  | 0.2188  | Non-genic |
| 5 | rs294964  | T | C | 0.04688 | 0.5563  | 0.2368  | Non-genic |
| 5 | rs2963894 | G | A | 0.07812 | 0.7083  | 0.2895  | Non-genic |
| 5 | rs2966742 | A | C | 0.125   | 0.7466  | 0.3529  | Non-genic |
| 5 | rs2973335 | C | T | 0.03125 | 0.4294  | 0.1316  | SSBP2     |
| 5 | rs317981  | T | C | 0.2812  | 0.05195 | 0.2692  | Non-genic |
| 5 | rs32441   | G | T | 0.03125 | 0.506   | 0.2632  | Non-genic |

|   |                |   |   |         |         |         |           |
|---|----------------|---|---|---------|---------|---------|-----------|
| 5 | rs330679       | G | A | 0.07812 | 0.4639  | 0.2632  | Non-genic |
| 5 | rs370663       | A | G | 0.1719  | 0.03529 | 0.1316  | EDIL3     |
| 5 | rs38055        | A | G | 0.03125 | 0.4241  | 0.2059  | Non-genic |
| 5 | rs3851461      | G | A | 0.2656  | 0.6463  | 0.4167  | Non-genic |
| 5 | rs402578       | C | T | 0.7031  | 0.131   | 0.4211  | Non-genic |
| 5 | rs409509       | G | A | 0.2031  | 0.4583  | 0.1579  | ARHGAP26  |
| 5 | rs4128239      | A | C | 0.07812 | 0.5235  | 0.2895  | Non-genic |
| 5 | rs42414        | T | G | 0.1094  | 0.4568  | 0.2105  | Non-genic |
| 5 | rs477086       | C | T | 0.2656  | 0.7907  | 0.5     | Non-genic |
| 5 | rs489770       | G | A | 0.4375  | 0.1446  | 0.4211  | GALNT10   |
| 5 | rs601441       | C | T | 0.25    | 0.7791  | 0.5     | Non-genic |
| 5 | rs6453484      | G | A | 0.4219  | 0.1941  | 0.4737  | CMYA5     |
| 5 | rs6555016      | T | C | 0.4531  | 0.06548 | 0.3421  | Non-genic |
| 5 | rs6864266      | C | T | 0.1719  | 0.5536  | 0.3421  | SLIT3     |
| 5 | rs6880003      | A | G | 0.5938  | 0.1047  | 0.3684  | FBXL17    |
| 5 | rs6887404      | C | A | 0.5     | 0.03614 | 0.3056  | ABLIM3    |
| 5 | rs6897242      | A | G | 0.375   | 0.7831  | 0.5     | Non-genic |
| 5 | rs724719       | G | A | 0.4531  | 0.1294  | 0.3158  | PJA2      |
| 5 | rs725580       | A | G | 0.4531  | 0.08721 | 0.3889  | C5orf56   |
| 5 | rs728693       | G | A | 0.3906  | 0.7267  | 0.4474  | CYFIP2    |
| 5 | rs7711674      | G | A | 0.4688  | 0.1173  | 0.3611  | Non-genic |
| 5 | rs7734364      | C | T | 0.03125 | 0.4506  | 0.2368  | ARHGAP26  |
| 5 | rs824848       | A | G | 0.2188  | 0.625   | 0.4167  | Non-genic |
| 5 | rs903850       | A | G | 0.01562 | 0.3471  | 0.1579  | ODZ2      |
| 5 | rs903981       | G | T | 0.1875  | 0.5893  | 0.3158  | ZNF454    |
| 5 | rs9122         | C | T | 0.09375 | 0.5     | 0.1579  | DCP2      |
| 5 | rs9285933      | A | G | 0       | 0.2733  | 0.02632 | PCBD2     |
| 5 | rs9292118      | C | T | 0.25    | 0.7143  | 0.4722  | Non-genic |
| 5 | rs9292998      | G | A | 0.6875  | 0.1395  | 0.4474  | CDH12     |
| 5 | rs9313348      | G | A | 0.2656  | 0.5793  | 0.2632  | Non-genic |
| 5 | rs9313635      | A | G | 0.01562 | 0.3081  | 0.02632 | Non-genic |
| 5 | rs9324964      | C | A | 0.1562  | 0.2986  | 0.05556 | Non-genic |
| 5 | rs9325005      | T | C | 0.3281  | 0.7941  | 0.2895  | Non-genic |
| 5 | rs9325006      | A | C | 0.3906  | 0.1098  | 0.3421  | Non-genic |
| 5 | rs9325124      | A | G | 0.7031  | 0.2927  | 0.5     | Non-genic |
| 5 | rs9327668      | T | C | 0.2969  | 0.03529 | 0.1842  | Non-genic |
| 5 | rs950714       | C | T | 0.4375  | 0.06977 | 0.3056  | TRPC7     |
| 5 | rs951224       | C | T | 0.3438  | 0.7012  | 0.3684  | ANXA6     |
| 5 | rs953741       | C | T | 0.04688 | 0.2442  | 0.05263 | ZFP2      |
| 5 | rs956274       | G | T | 0.1406  | 0.5513  | 0.3056  | Non-genic |
| 5 | rs984832       | T | C | 0.04688 | 0.4551  | 0.07895 | Non-genic |
| 5 | rs1004558<br>5 | G | T | 0.5     | 0.08537 | 0.2632  | Non-genic |
| 5 | rs1006778<br>8 | C | A | 0.6406  | 0.1412  | 0.3158  | Non-genic |
| 5 | rs1035858      | T | C | 0.1094  | 0.5536  | 0.3947  | Non-genic |
| 5 | rs1035997      | C | T | 0.1719  | 0.6667  | 0.4412  | Non-genic |
| 5 | rs1049122<br>7 | G | A | 0.8125  | 0.2711  | 0.3947  | Non-genic |

|   |                |   |   |         |         |         |           |
|---|----------------|---|---|---------|---------|---------|-----------|
| 5 | rs1051271<br>2 | T | C | 0.125   | 0.5417  | 0.3421  | Non-genic |
| 5 | rs1051294<br>7 | C | T | 0.375   | 0.06977 | 0.2105  | Non-genic |
| 5 | rs1051314<br>4 | G | A | 0.6094  | 0.06548 | 0.2188  | Non-genic |
| 5 | rs1051415<br>9 | T | C | 0.03125 | 0.5238  | 0.3684  | JMY       |
| 5 | rs1051430<br>6 | T | G | 0.3125  | 0.1519  | 0.05556 | Non-genic |
| 5 | rs1051496<br>8 | G | A | 0       | 0.3086  | 0.2632  | Non-genic |
| 5 | rs1051529<br>5 | T | C | 0.8125  | 0.2093  | 0.4211  | Non-genic |
| 5 | rs1051549<br>7 | T | C | 0.2031  | 0.5241  | 0.3684  | Non-genic |
| 5 | rs1051990<br>6 | T | C | 0.4688  | 0.1265  | 0.2368  | Non-genic |
| 5 | rs1052000<br>6 | G | A | 0.7656  | 0.186   | 0.2941  | Non-genic |
| 5 | rs1158558      | T | G | 0.09677 | 0.875   | 0.5     | CDH18     |
| 5 | rs1309824      | G | T | 0.7812  | 0.4529  | 0.4474  | NLN       |
| 5 | rs1362811      | C | T | 0.7656  | 0.2439  | 0.4474  | Non-genic |
| 5 | rs1363448      | C | T | 0.1094  | 0.5523  | 0.3947  | PCDHGA3   |
| 5 | rs1363886      | C | T | 0.4531  | 0.1325  | 0.2632  | Non-genic |
| 5 | rs1366393      | T | C | 0.25    | 0.7442  | 0.5     | MCC       |
| 5 | rs1377489      | C | T | 0       | 0.3512  | 0.1842  | Non-genic |
| 5 | rs1457128      | T | C | 0.75    | 0.3081  | 0.2632  | PLCXD3    |
| 5 | rs1505851      | T | C | 0.2031  | 0.6235  | 0.4333  | Non-genic |
| 5 | rs1520263      | A | C | 0.4531  | 0.04706 | 0.1389  | Non-genic |
| 5 | rs152599       | G | T | 0.0625  | 0.6585  | 0.3947  | EFNA5     |
| 5 | rs1549690      | A | C | 0.6875  | 0.157   | 0.3947  | FYB       |
| 5 | rs1560059      | A | G | 0.01562 | 0.3155  | 0.2895  | Non-genic |
| 5 | rs1582545      | A | G | 0.5938  | 0.1686  | 0.1579  | Non-genic |
| 5 | rs159978       | A | G | 0.3906  | 0.04217 | 0.1053  | Non-genic |
| 5 | rs172570       | C | A | 0.4375  | 0.04118 | 0.1389  | Non-genic |
| 5 | rs173467       | T | C | 0.6094  | 0.1728  | 0.2368  | Non-genic |
| 5 | rs1862175      | T | C | 0.1406  | 0.5533  | 0.4737  | Non-genic |
| 5 | rs1867324      | G | A | 0.03125 | 0.6453  | 0.4211  | MCC       |
| 5 | rs187462       | T | C | 0.04688 | 0.4059  | 0.2368  | Non-genic |
| 5 | rs1898162      | A | G | 0.5312  | 0.1975  | 0.2105  | Non-genic |
| 5 | rs1909535      | C | T | 0.3281  | 0.05814 | 0.05263 | Non-genic |
| 5 | rs191899       | C | T | 0.9062  | 0.4589  | 0.4375  | Non-genic |
| 5 | rs2029478      | C | T | 0.1406  | 0.5     | 0.3421  | Non-genic |
| 5 | rs2059121      | A | G | 0.01562 | 0.4294  | 0.2632  | Non-genic |
| 5 | rs2060428      | C | T | 0.875   | 0.4329  | 0.5     | SPOCK1    |
| 5 | rs2061237      | A | G | 0       | 0.04118 | 0.2188  | Non-genic |
| 5 | rs2116739      | C | T | 0.1406  | 0.7235  | 0.4474  | Non-genic |
| 5 | rs2135046      | T | C | 0.03125 | 0.3605  | 0.2368  | KCNIP1    |
| 5 | rs2158175      | G | A | 0.5938  | 0.1221  | 0.2632  | Non-genic |
| 5 | rs2304066      | C | T | 0.5625  | 0.1395  | 0.2895  | Non-genic |

|   |           |   |   |         |         |         |           |
|---|-----------|---|---|---------|---------|---------|-----------|
| 5 | rs2337692 | A | G | 0.6875  | 0.1588  | 0.4211  | MAP1B     |
| 5 | rs2372045 | C | A | 0.2188  | 0.5793  | 0.4474  | Non-genic |
| 5 | rs252761  | G | T | 0.03226 | 0.5647  | 0.3684  | AP3B1     |
| 5 | rs255481  | G | A | 0.2188  | 0.6049  | 0.4444  | Non-genic |
| 5 | rs255824  | C | T | 0.01562 | 0.2412  | 0.1316  | CCDC99    |
| 5 | rs2603014 | C | T | 0.7031  | 0.2941  | 0.4474  | Non-genic |
| 5 | rs260326  | T | C | 0.4219  | 0.07558 | 0.2368  | FYB       |
| 5 | rs26152   | G | A | 0.0625  | 0.439   | 0.4737  | CTNND2    |
| 5 | rs26207   | G | T | 0.125   | 0.6548  | 0.4474  | ADAMTS19  |
| 5 | rs2672734 | G | A | 0.75    | 0.3721  | 0.4474  | EXOC3     |
| 5 | rs27628   | A | C | 0.1562  | 0.5779  | 0.3947  | Non-genic |
| 5 | rs2901679 | G | A | 0.4531  | 0.1358  | 0.2632  | Non-genic |
| 5 | rs2909704 | A | G | 0.75    | 0.3353  | 0.3889  | Non-genic |
| 5 | rs2925071 | A | G | 0.5     | 0.09036 | 0.2941  | Non-genic |
| 5 | rs2956597 | G | A | 0.8438  | 0.06977 | 0.4211  | EGFLAM    |
| 5 | rs296171  | A | G | 0.5156  | 0.119   | 0.1842  | Non-genic |
| 5 | rs31331   | G | T | 0.7188  | 0.2965  | 0.4737  | Non-genic |
| 5 | rs3172941 | T | C | 0.5781  | 0.2857  | 0.3421  | GALNT10   |
| 5 | rs31951   | G | A | 0.6719  | 0.1369  | 0.3889  | CTNND2    |
| 5 | rs32466   | T | C | 0.4219  | 0.1337  | 0.2368  | Non-genic |
| 5 | rs328970  | T | C | 0.07812 | 0.1353  | 0.1316  | Non-genic |
| 5 | rs336960  | A | G | 0.6875  | 0.2529  | 0.4211  | HAPLN1    |
| 5 | rs34512   | G | A | 0.09677 | 0.436   | 0.4737  | Non-genic |
| 5 | rs34697   | G | A | 0.01562 | 0.5174  | 0.3158  | MAST4     |
| 5 | rs347661  | C | T | 0.7188  | 0.5     | 0.4737  | Non-genic |
| 5 | rs358523  | C | T | 0.5469  | 0.09375 | 0.2941  | Non-genic |
| 5 | rs368337  | C | T | 0.1719  | 0.5062  | 0.3947  | Non-genic |
| 5 | rs379707  | C | A | 0.7969  | 0.3476  | 0.4474  | FYB       |
| 5 | rs3844303 | A | C | 0.4219  | 0.1744  | 0       | Non-genic |
| 5 | rs3846599 | C | T | 0       | 0.3471  | 0.2368  | CCT5      |
| 5 | rs3846687 | T | C | 0       | 0.3605  | 0.2105  | Non-genic |
| 5 | rs3935014 | A | G | 0.4531  | 0.1076  | 0.1579  | EGFLAM    |
| 5 | rs4254932 | C | A | 0.3438  | 0.07558 | 0.05263 | Non-genic |
| 5 | rs438418  | G | A | 0.4531  | 0.09302 | 0.2368  | Non-genic |
| 5 | rs448182  | A | G | 0.1094  | 0.6221  | 0.3947  | RAI14     |
| 5 | rs4532382 | T | C | 0.6094  | 0.2176  | 0.2895  | Non-genic |
| 5 | rs4702121 | G | T | 0.75    | 0.2321  | 0.2941  | Non-genic |
| 5 | rs4836251 | C | T | 0.1094  | 0.5647  | 0.4474  | Non-genic |
| 5 | rs492938  | G | A | 0.6875  | 0.2143  | 0.4474  | Non-genic |
| 5 | rs615344  | T | G | 0.7656  | 0.3735  | 0.4737  | DROSHA    |
| 5 | rs6555620 | C | T | 0.125   | 0.5581  | 0.3421  | Non-genic |
| 5 | rs6580266 | G | A | 0.03125 | 0.4157  | 0.2895  | ARHGAP26  |
| 5 | rs66782   | C | T | 0.7031  | 0.3605  | 0.2368  | FYB       |
| 5 | rs6862563 | A | G | 0       | 0.09302 | 0.07895 | ADAMTS2   |
| 5 | rs6870730 | G | A | 0.1562  | 0.6726  | 0.4737  | Non-genic |
| 5 | rs6883095 | A | G | 0.1406  | 0.4593  | 0.3421  | Non-genic |
| 5 | rs6897947 | C | T | 0.7812  | 0.4313  | 0.4375  | SEMA6A    |
| 5 | rs716376  | C | T | 0.01562 | 0.3086  | 0.3125  | Non-genic |

|   |                |   |   |         |         |         |           |
|---|----------------|---|---|---------|---------|---------|-----------|
| 5 | rs725937       | C | T | 0.8594  | 0.5235  | 0.4722  | SPARC     |
| 5 | rs748418       | T | C | 0.01562 | 0.3165  | 0.2105  | Non-genic |
| 5 | rs759947       | G | A | 0.09375 | 0.4529  | 0.2895  | CAMK4     |
| 5 | rs763497       | G | A | 0.5469  | 0.1588  | 0.3421  | Non-genic |
| 5 | rs7709159      | T | C | 0.7031  | 0.04118 | 0.3158  | Non-genic |
| 5 | rs7726915      | T | C | 0.5     | 0.1588  | 0.2632  | Non-genic |
| 5 | rs7731154      | G | A | 0.125   | 0.5432  | 0.4211  | Non-genic |
| 5 | rs7735817      | T | G | 0.625   | 0.241   | 0.3158  | CDH10     |
| 5 | rs861085       | G | A | 0.03125 | 0.4241  | 0.2632  | Non-genic |
| 5 | rs878196       | T | G | 0       | 0.3953  | 0.2632  | Non-genic |
| 5 | rs918604       | T | C | 0.5625  | 0.2229  | 0.2105  | Non-genic |
| 5 | rs9285957      | G | A | 0.01562 | 0.3797  | 0.3438  | Non-genic |
| 5 | rs9291789      | G | A | 0.6875  | 0.2857  | 0.4474  | Non-genic |
| 5 | rs9313203      | A | G | 0.03125 | 0.3895  | 0.2632  | ADCY2     |
| 5 | rs9324817      | A | G | 0.07812 | 0.4615  | 0.3684  | Non-genic |
| 5 | rs9327510      | C | T | 0.5     | 0.1294  | 0.1579  | Non-genic |
| 5 | rs9328010      | A | G | 0.625   | 0.2667  | 0.3235  | EFNA5     |
| 5 | rs959134       | A | G | 0.6129  | 0.1883  | 0.3158  | Non-genic |
| 5 | rs982054       | C | T | 0.6406  | 0.2622  | 0.4474  | Non-genic |
| 6 | rs1884054      | A | C | 0.1094  | 0.4578  | 0.2647  | ESR1      |
| 6 | rs722208       | A | G | 0.3594  | 0.6216  | 0.375   | ESR1      |
| 6 | rs726281       | A | G | 0.1406  | 0.5309  | 0.25    | ESR1      |
| 6 | rs723054       | C | T | 0.7031  | 0.2963  | 0.2812  | ATXN1     |
| 6 | rs9285480      | T | C | 0.7188  | 0.09884 | 0.2632  | AHI1      |
| 6 | rs1048463<br>3 | C | T | 0       | 0.247   | 0.08824 | CDKAL1    |
| 6 | rs1395122      | T | G | 0       | 0.1802  | 0.02632 | SIM1      |
| 6 | rs9296459      | A | G | 0.01562 | 0.3354  | 0.07895 | RUNX2     |
| 6 | rs2294809      | T | C | 0.0625  | 0.3846  | 0.2647  | CDKAL1    |
| 6 | rs1407179      | A | C | 0.01562 | 0.2733  | 0.2105  | ROS1      |
| 6 | rs1049879<br>2 | C | T | 0.2812  | 0.09868 | 0.4     | PKHD1     |
| 6 | rs481795       | C | T | 0.3281  | 0.7153  | 0.4118  | PKHD1     |
| 6 | rs1266922      | G | A | 0.5469  | 0.2597  | 0.2895  | PKHD1     |
| 6 | rs6916797      | G | A | 0.6094  | 0.1829  | 0.3333  | PKHD1     |
| 6 | rs1018401      | G | A | 0.01562 | 0.4186  | 0.2105  | Non-genic |
| 6 | rs1038304      | A | G | 0.2031  | 0.4419  | 0.2368  | C6orf97   |
| 6 | rs1040530      | T | C | 0.2656  | 0.5988  | 0.1842  | GMDS      |
| 6 | rs1048425<br>1 | A | G | 0.04688 | 0.3059  | 0.1053  | RANBP9    |
| 6 | rs1048438<br>0 | A | G | 0.3594  | 0.07831 | 0.3235  | Non-genic |
| 6 | rs1048450<br>5 | A | G | 0       | 0.2558  | 0.08333 | Non-genic |
| 6 | rs1048470<br>2 | C | T | 0.2188  | 0.6588  | 0.3158  | Non-genic |
| 6 | rs1048480<br>3 | A | G | 0.0625  | 0.343   | 0.1944  | Non-genic |
| 6 | rs1048481<br>3 | G | A | 0.09375 | 0.2733  | 0.05263 | PARK2     |

|   |                |   |   |         |         |         |           |
|---|----------------|---|---|---------|---------|---------|-----------|
| 6 | rs1048498<br>0 | C | T | 0.25    | 0.03529 | 0.2368  | Non-genic |
| 6 | rs1048517<br>0 | C | T | 0.4219  | 0.0814  | 0.3158  | Non-genic |
| 6 | rs1048523<br>8 | G | A | 0.2812  | 0.6558  | 0.3421  | Non-genic |
| 6 | rs1048533<br>4 | C | T | 0.4219  | 0.1325  | 0.4167  | Non-genic |
| 6 | rs1048535<br>8 | C | T | 0.1562  | 0.5     | 0.1579  | PHF3      |
| 6 | rs1048537<br>2 | C | T | 0.1719  | 0.1024  | 0.4722  | Non-genic |
| 6 | rs1049872<br>6 | A | G | 0.01562 | 0.2706  | 0.05556 | LRRC16A   |
| 6 | rs1049886<br>6 | T | C | 0.07812 | 0.6824  | 0.2895  | Non-genic |
| 6 | rs1049887<br>9 | A | G | 0.03125 | 0.2039  | 0.07143 | Non-genic |
| 6 | rs1049891<br>6 | T | C | 0.1094  | 0.4647  | 0.2105  | Non-genic |
| 6 | rs1049899<br>9 | G | A | 0.07812 | 0.6605  | 0.2895  | Non-genic |
| 6 | rs1049911<br>6 | A | G | 0.07812 | 0.6892  | 0.3125  | Non-genic |
| 6 | rs1049913<br>3 | T | C | 0.5781  | 0.08537 | 0.4706  | Non-genic |
| 6 | rs1049921<br>4 | A | G | 0.4219  | 0.7024  | 0.3889  | Non-genic |
| 6 | rs1208254      | C | A | 0.5938  | 0.05294 | 0.3684  | Non-genic |
| 6 | rs1224527      | T | C | 0.4531  | 0.1488  | 0.3611  | Non-genic |
| 6 | rs1316575      | C | T | 0.2344  | 0.5882  | 0.3529  | Non-genic |
| 6 | rs1316831      | C | A | 0.1406  | 0.5412  | 0.1842  | Non-genic |
| 6 | rs1319548      | C | T | 0.2188  | 0.5529  | 0.2895  | Non-genic |
| 6 | rs1322394      | G | A | 0.1719  | 0.7384  | 0.4474  | IL20RA    |
| 6 | rs1324965      | A | C | 0.1562  | 0.5407  | 0.2368  | PACRG     |
| 6 | rs1327272      | G | A | 0.03125 | 0.3312  | 0.02632 | Non-genic |
| 6 | rs1352381      | A | G | 0.2188  | 0.7176  | 0.3333  | Non-genic |
| 6 | rs1357056      | A | G | 0.4219  | 0.939   | 0.4412  | Non-genic |
| 6 | rs1388930      | G | A | 0.03125 | 0.3663  | 0.1316  | Non-genic |
| 6 | rs1407793      | A | G | 0.2656  | 0.6744  | 0.3684  | Non-genic |
| 6 | rs1429143      | A | G | 0.1406  | 0.8095  | 0.3947  | Non-genic |
| 6 | rs1452882      | C | T | 0.0625  | 0.3494  | 0.05263 | Non-genic |
| 6 | rs1538741      | A | G | 0       | 0.1964  | 0.02632 | Non-genic |
| 6 | rs1591514      | T | C | 0.09375 | 0.4295  | 0.08333 | Non-genic |
| 6 | rs1760655      | T | C | 0.03226 | 0.3988  | 0.1842  | Non-genic |
| 6 | rs1811899      | C | T | 0       | 0.3171  | 0.08333 | Non-genic |
| 6 | rs1825651      | G | A | 0.3125  | 0.6585  | 0.4375  | Non-genic |
| 6 | rs1841258      | C | T | 0.3906  | 0.06707 | 0.3421  | Non-genic |
| 6 | rs1842129      | C | T | 0.1094  | 0.6369  | 0.3158  | NKAIN2    |
| 6 | rs1890061      | T | C | 0.375   | 0.7202  | 0.3611  | Non-genic |
| 6 | rs1928055      | G | A | 0.2969  | 0.05233 | 0.2632  | Non-genic |
| 6 | rs1931991      | C | A | 0.04688 | 0.2882  | 0.02632 | Non-genic |

|   |           |   |   |         |         |         |           |
|---|-----------|---|---|---------|---------|---------|-----------|
| 6 | rs1934225 | T | C | 0.3125  | 0.1098  | 0.2632  | Non-genic |
| 6 | rs1935423 | A | C | 0.0625  | 0.4     | 0.2105  | Non-genic |
| 6 | rs1980530 | A | G | 0.01562 | 0.3519  | 0.02632 | CLIC5     |
| 6 | rs1982756 | A | C | 0.4219  | 0.1012  | 0.3684  | TREML4    |
| 6 | rs1989634 | G | A | 0.2188  | 0.5872  | 0.2632  | Non-genic |
| 6 | rs1991355 | C | T | 0.1562  | 0.5696  | 0.1765  | Non-genic |
| 6 | rs2011841 | T | C | 0.03125 | 0.6     | 0.1842  | Non-genic |
| 6 | rs2012025 | G | A | 0.1094  | 0.6     | 0.25    | GMDS      |
| 6 | rs2063345 | G | A | 0.07812 | 0.5533  | 0.2778  | SLC22A3   |
| 6 | rs2119483 | A | G | 0.5     | 0.1235  | 0.3421  | GFOD1     |
| 6 | rs2191037 | T | C | 0.5     | 0.6882  | 0.2632  | Non-genic |
| 6 | rs2207022 | A | C | 0.6406  | 0.1131  | 0.4722  | Non-genic |
| 6 | rs2224854 | G | A | 0.5645  | 0.8963  | 0.4688  | Non-genic |
| 6 | rs2282315 | G | A | 0.01562 | 0.1062  | 0.02778 | Non-genic |
| 6 | rs2297939 | A | G | 0.01562 | 0.4524  | 0.1316  | Non-genic |
| 6 | rs2326794 | T | C | 0.3281  | 0.7683  | 0.5     | LAMA2     |
| 6 | rs2342763 | A | G | 0.375   | 0.1607  | 0.3947  | BAI3      |
| 6 | rs2345326 | T | C | 0.03125 | 0.3415  | 0.02632 | KHDRBS2   |
| 6 | rs243119  | C | T | 0.07812 | 0.5312  | 0.1842  | Non-genic |
| 6 | rs2552085 | T | C | 0.01562 | 0.1329  | 0       | NKAIN2    |
| 6 | rs265353  | T | C | 0.3906  | 0.06548 | 0.2632  | LAMA2     |
| 6 | rs2743610 | C | T | 0.5156  | 0.01829 | 0.3684  | Non-genic |
| 6 | rs2745443 | T | C | 0.4219  | 0.7848  | 0.4615  | VNN1      |
| 6 | rs2747679 | C | T | 0.3281  | 0.0814  | 0.3421  | FAM65B    |
| 6 | rs2895553 | T | C | 0.5625  | 0.09639 | 0.3947  | Non-genic |
| 6 | rs3117222 | T | C | 0.625   | 0.2151  | 0.4211  | Non-genic |
| 6 | rs326798  | A | G | 0.07812 | 0.7381  | 0.1579  | Non-genic |
| 6 | rs3777442 | C | T | 0.07812 | 0.6118  | 0.2105  | EPB41L2   |
| 6 | rs3827791 | G | A | 0       | 0.2176  | 0       | EFHC1     |
| 6 | rs3846766 | C | A | 0.1562  | 0.5197  | 0.2059  | Non-genic |
| 6 | rs3887266 | T | C | 0.01562 | 0.1     | 0.02632 | SLC17A3   |
| 6 | rs391652  | A | G | 0.3438  | 0.8688  | 0.5     | Non-genic |
| 6 | rs3949571 | C | T | 0.5938  | 0.8642  | 0.5     | Non-genic |
| 6 | rs4259288 | A | G | 0.2812  | 0.6923  | 0.3947  | Non-genic |
| 6 | rs4406196 | C | T | 0.3906  | 0.7824  | 0.4474  | Non-genic |
| 6 | rs4473834 | C | T | 0.3906  | 0.7791  | 0.4474  | Non-genic |
| 6 | rs4515397 | T | C | 0.09375 | 0.7384  | 0.3421  | FUT9      |
| 6 | rs458788  | G | A | 0.01562 | 0.5353  | 0.1316  | Non-genic |
| 6 | rs4712415 | C | T | 0.2031  | 0.5706  | 0.2895  | Non-genic |
| 6 | rs476277  | G | A | 0.2031  | 0.679   | 0.3158  | Non-genic |
| 6 | rs4960221 | C | T | 0.3906  | 0.7616  | 0.4737  | LY86      |
| 6 | rs511996  | A | C | 0.5312  | 0.1369  | 0.4211  | GFOD1     |
| 6 | rs566568  | A | G | 0.5469  | 0.09884 | 0.3611  | Non-genic |
| 6 | rs569979  | G | A | 0.07812 | 0.3675  | 0.2105  | Non-genic |
| 6 | rs575595  | G | A | 0.6875  | 0.1163  | 0.4211  | NKAIN2    |
| 6 | rs595413  | T | C | 0.1406  | 0.6977  | 0.3684  | C6orf146  |
| 6 | rs6455738 | A | G | 0.1562  | 0.5542  | 0.3421  | PARK2     |
| 6 | rs6455739 | A | G | 0.1562  | 0.5471  | 0.3421  | PARK2     |

|   |           |   |   |         |         |         |           |
|---|-----------|---|---|---------|---------|---------|-----------|
| 6 | rs6458008 | T | C | 0.4062  | 0.7733  | 0.3421  | MDGA1     |
| 6 | rs6570520 | C | A | 0.625   | 0.09524 | 0.3684  | Non-genic |
| 6 | rs6904295 | C | T | 0.4062  | 0.7384  | 0.3947  | Non-genic |
| 6 | rs6919441 | C | T | 0.4062  | 0.7384  | 0.3947  | Non-genic |
| 6 | rs6926377 | A | C | 0.1719  | 0.5793  | 0.2368  | UTRN      |
| 6 | rs6935961 | A | G | 0.125   | 0.6     | 0.1579  | Non-genic |
| 6 | rs6938586 | T | C | 0.4219  | 0.7791  | 0.3947  | EPB41L2   |
| 6 | rs717389  | C | T | 0       | 0.3059  | 0.1053  | Non-genic |
| 6 | rs718220  | T | C | 0.4531  | 0.7952  | 0.3684  | Non-genic |
| 6 | rs718233  | T | G | 0.09375 | 0.2059  | 0.05263 | RHAG      |
| 6 | rs734014  | G | A | 0.1719  | 0.5179  | 0.2105  | FAM65B    |
| 6 | rs742769  | T | C | 0.01562 | 0.4524  | 0.1579  | PARK2     |
| 6 | rs7748283 | C | T | 0.2258  | 0.5174  | 0.2105  | Non-genic |
| 6 | rs7763794 | C | T | 0.4219  | 0.07059 | 0.3421  | Non-genic |
| 6 | rs7775534 | C | T | 0.2344  | 0.5698  | 0.2632  | Non-genic |
| 6 | rs794266  | A | G | 0.3438  | 0.4321  | 0.3684  | FAM184A   |
| 6 | rs802228  | T | C | 0.25    | 0.7055  | 0.4706  | NKAIN2    |
| 6 | rs879831  | A | G | 0.7188  | 0.1588  | 0.4474  | Non-genic |
| 6 | rs902370  | G | A | 0.1562  | 0.7     | 0.4211  | LAMA2     |
| 6 | rs924974  | T | G | 0.4375  | 0.1375  | 0.3947  | Non-genic |
| 6 | rs926402  | C | T | 0.0625  | 0.4593  | 0.1842  | Non-genic |
| 6 | rs9293853 | A | G | 0.1406  | 0.5417  | 0.2632  | Non-genic |
| 6 | rs9294101 | A | G | 0.4531  | 0.05952 | 0.2941  | Non-genic |
| 6 | rs9294122 | A | G | 0       | 0.2952  | 0.07895 | Non-genic |
| 6 | rs9294187 | G | A | 0.04688 | 0.2763  | 0.1316  | Non-genic |
| 6 | rs9294511 | C | T | 0.2812  | 0.8214  | 0.4722  | Non-genic |
| 6 | rs9294559 | G | A | 0.5625  | 0.8654  | 0.4737  | Non-genic |
| 6 | rs9294790 | G | T | 0.01562 | 0.2857  | 0.05263 | Non-genic |
| 6 | rs9295647 | A | G | 0.4062  | 0.8049  | 0.4474  | Non-genic |
| 6 | rs9296322 | C | T | 0.125   | 0.4294  | 0.1579  | Non-genic |
| 6 | rs9296359 | A | G | 0.01562 | 0.2326  | 0.07895 | TREML4    |
| 6 | rs9296606 | A | G | 0.01562 | 0.2792  | 0.1316  | Non-genic |
| 6 | rs9296711 | G | A | 0.6406  | 0.1768  | 0.4211  | Non-genic |
| 6 | rs9320866 | T | G | 0.4219  | 0.08434 | 0.4722  | Non-genic |
| 6 | rs9321038 | C | T | 0.4531  | 0.8025  | 0.5     | Non-genic |
| 6 | rs9321208 | A | G | 0.04688 | 0.125   | 0.02632 | L3MBTL3   |
| 6 | rs9321549 | T | C | 0.4062  | 0.07647 | 0.2632  | PDE7B     |
| 6 | rs9322536 | G | A | 0.2188  | 0.5422  | 0.3158  | Non-genic |
| 6 | rs933064  | T | C | 0.5156  | 0.1145  | 0.4211  | EPB41L2   |
| 6 | rs9400624 | T | C | 0.6719  | 0.2593  | 0.4722  | Non-genic |
| 6 | rs947746  | T | C | 0       | 0.2941  | 0.07895 | KCNQ5     |
| 6 | rs94802   | T | C | 0.04688 | 0.4941  | 0.07895 | Non-genic |
| 6 | rs951251  | A | G | 0       | 0.2738  | 0.1053  | Non-genic |
| 6 | rs952111  | T | C | 0.2656  | 0.5407  | 0.3947  | Non-genic |
| 6 | rs952571  | G | A | 0.01562 | 0.4107  | 0.1842  | Non-genic |
| 6 | rs958386  | T | C | 0.07812 | 0.4643  | 0.2632  | Non-genic |
| 6 | rs962312  | A | G | 0.04688 | 0.4932  | 0.25    | Non-genic |
| 6 | rs975618  | A | G | 0.4844  | 0.1529  | 0.4211  | Non-genic |



|   |                |   |   |         |         |        |           |
|---|----------------|---|---|---------|---------|--------|-----------|
| 6 | rs977382       | C | T | 0.3906  | 0.1012  | 0.3421 | Non-genic |
| 6 | rs993314       | T | C | 0.1875  | 0.5893  | 0.3158 | KCNQ5     |
| 6 | rs1048455<br>4 | T | C | 0.1562  | 0.1647  | 0.3421 | Non-genic |
| 6 | rs1048458<br>0 | T | C | 0.01562 | 0.2933  | 0.1579 | AIG1      |
| 6 | rs1048483<br>3 | C | T | 0.3125  | 0.04118 | 0.1053 | Non-genic |
| 6 | rs1048490<br>4 | A | G | 0.625   | 0.3605  | 0.4474 | Non-genic |
| 6 | rs1048497<br>0 | A | G | 0.4688  | 0.2895  | 0.2333 | Non-genic |
| 6 | rs1048500<br>5 | C | A | 0.04688 | 0.3289  | 0.3667 | Non-genic |
| 6 | rs1048510<br>1 | T | C | 0.04688 | 0.1691  | 0.2941 | Non-genic |
| 6 | rs1048525<br>6 | T | C | 0.01562 | 0.25    | 0.1579 | SYNE1     |
| 6 | rs1048540<br>8 | A | G | 0.03125 | 0.3205  | 0.2812 | Non-genic |
| 6 | rs1049894<br>2 | G | T | 0.1094  | 0.1301  | 0.3    | Non-genic |
| 6 | rs1049899<br>1 | C | T | 0.4531  | 0.1709  | 0.2    | Non-genic |
| 6 | rs1145862      | A | G | 0.375   | 0.08824 | 0.1389 | Non-genic |
| 6 | rs1247343      | C | T | 0.4531  | 0.1176  | 0.2368 | Non-genic |
| 6 | rs1327261      | T | C | 0.5781  | 0.1     | 0.1429 | Non-genic |
| 6 | rs1362932      | G | A | 0.09375 | 0.5407  | 0.3684 | Non-genic |
| 6 | rs1407530      | A | C | 0       | 0.3571  | 0.2059 | Non-genic |
| 6 | rs1408282      | A | G | 0.01562 | 0.2378  | 0.1842 | Non-genic |
| 6 | rs1414102      | A | G | 0.4531  | 0.1471  | 0.2105 | C6orf201  |
| 6 | rs1474787      | T | C | 0.5938  | 0.2687  | 0.3947 | MTHFD1L   |
| 6 | rs149971       | G | A | 0.03125 | 0.4882  | 0.3158 | Non-genic |
| 6 | rs1521219      | C | T | 0.6406  | 0.2208  | 0.2812 | Non-genic |
| 6 | rs1570843      | T | C | 0       | 0.6941  | 0.3947 | Non-genic |
| 6 | rs1923416      | C | T | 0.8906  | 0.07558 | 0.4737 | Non-genic |
| 6 | rs195422       | A | G | 0.3281  | 0.05882 | 0.1053 | TBC1D22B  |
| 6 | rs1976109      | G | A | 0.625   | 0.241   | 0.3611 | Non-genic |
| 6 | rs197963       | T | C | 0.125   | 0.6     | 0.4444 | Non-genic |
| 6 | rs2076472      | C | T | 0       | 0.3081  | 0.1842 | APOBEC2   |
| 6 | rs2182277      | T | C | 0.3438  | 0.04651 | 0.1316 | Non-genic |
| 6 | rs2225369      | C | T | 0.0625  | 0.5061  | 0.3158 | Non-genic |
| 6 | rs2245777      | C | T | 0.6719  | 0.2907  | 0.4167 | Non-genic |
| 6 | rs2354095      | T | C | 0.4219  | 0.1105  | 0.1842 | SCML4     |
| 6 | rs2396821      | C | T | 0.7344  | 0.2647  | 0.4737 | Non-genic |
| 6 | rs2496388      | A | G | 0.1406  | 0.686   | 0.4211 | Non-genic |
| 6 | rs265360       | T | C | 0.7188  | 0.2952  | 0.4444 | LAMA2     |
| 6 | rs2875980      | A | G | 0.6094  | 0.1607  | 0.2368 | FARS2     |
| 6 | rs3763188      | C | T | 0       | 0.314   | 0.1579 | REPS1     |
| 6 | rs3798709      | G | A | 0       | 0.3235  | 0.2105 | ELOVL2    |
| 6 | rs3800472      | A | G | 0.04688 | 0.4128  | 0.3684 | PACSLN1   |

|   |           |   |   |         |         |         |           |
|---|-----------|---|---|---------|---------|---------|-----------|
| 6 | rs4129313 | A | G | 0.1406  | 0.5455  | 0.4444  | Non-genic |
| 6 | rs531156  | A | G | 0.04688 | 0.5952  | 0.3421  | Non-genic |
| 6 | rs535647  | A | G | 0.04688 | 0.5952  | 0.3421  | Non-genic |
| 6 | rs611748  | G | A | 0.01562 | 0.2279  | 0.1562  | Non-genic |
| 6 | rs632286  | A | G | 0.5938  | 0.2195  | 0.3889  | NKAIN2    |
| 6 | rs636864  | T | C | 0.5938  | 0.1687  | 0.2105  | Non-genic |
| 6 | rs654118  | G | A | 0.0625  | 0.5349  | 0.4737  | Non-genic |
| 6 | rs6569943 | C | A | 0.4062  | 0.06548 | 0.1053  | Non-genic |
| 6 | rs657057  | T | C | 0.1562  | 0.5706  | 0.4474  | Non-genic |
| 6 | rs6902919 | A | G | 0.5625  | 0.1744  | 0.3684  | Non-genic |
| 6 | rs6911727 | T | C | 0.2188  | 0.6647  | 0.4474  | Non-genic |
| 6 | rs6915095 | C | T | 0.3125  | 0.07738 | 0.1316  | Non-genic |
| 6 | rs6922269 | A | G | 0.5968  | 0.25    | 0.3947  | MTHFD1L   |
| 6 | rs6930478 | A | G | 0.3281  | 0.1145  | 0.05263 | HIVEP2    |
| 6 | rs724875  | G | A | 0.6094  | 0.1627  | 0.3421  | MAP7      |
| 6 | rs7757672 | A | G | 0       | 0.4118  | 0.2105  | Non-genic |
| 6 | rs7769173 | A | C | 0.8438  | 0.4471  | 0.4737  | NEDD9     |
| 6 | rs847000  | T | C | 0.5625  | 0.1205  | 0.2632  | Non-genic |
| 6 | rs847001  | T | C | 0.6406  | 0.125   | 0.3056  | Non-genic |
| 6 | rs894240  | A | G | 0.1094  | 0.6111  | 0.4706  | Non-genic |
| 6 | rs9285530 | T | G | 0.03125 | 0.4118  | 0.3421  | AKAP12    |
| 6 | rs9295089 | C | T | 0.375   | 0.05556 | 0.1842  | TAGAP     |
| 6 | rs9296092 | G | A | 0.1719  | 0.7733  | 0.4737  | Non-genic |
| 6 | rs9296510 | C | T | 0.09375 | 0.5407  | 0.3684  | Non-genic |
| 6 | rs9320243 | G | A | 0.4688  | 0.06024 | 0.1667  | Non-genic |
| 6 | rs9320760 | A | G | 0.03125 | 0.3038  | 0.1786  | Non-genic |
| 6 | rs9320808 | A | G | 0.8906  | 0.25    | 0.5     | C6orf170  |
| 6 | rs9320813 | G | A | 0.5625  | 0.1471  | 0.2632  | Non-genic |
| 6 | rs9320930 | A | G | 0.8594  | 0.2882  | 0.4211  | TRDN      |
| 6 | rs9321445 | C | T | 0.5625  | 0.3049  | 0.1579  | Non-genic |
| 6 | rs9321496 | T | G | 0.03125 | 0.4765  | 0.3158  | Non-genic |
| 6 | rs9328416 | T | C | 0.375   | 0.05882 | 0.2105  | Non-genic |
| 6 | rs9328449 | T | C | 0.7188  | 0.2733  | 0.3421  | TXNDC5    |
| 6 | rs950286  | A | G | 0.2812  | 0.05814 | 0.02632 | Non-genic |
| 6 | rs952901  | G | A | 0.1406  | 0.4268  | 0.3438  | PARK2     |
| 6 | rs960297  | C | T | 0.0625  | 0.3519  | 0.3056  | Non-genic |
| 6 | rs998645  | A | G | 0.6719  | 0.2647  | 0.4474  | Non-genic |
| 7 | rs714180  | A | G | 0.04688 | 0.436   | 0.1316  | MET       |
| 7 | rs2189813 | T | C | 0.3281  | 0.7714  | 0.4118  | GRM3      |
| 7 | rs2284280 | C | A | 0.04688 | 0.5698  | 0.2368  | NRCAM     |
| 7 | rs1006817 | A | C | 0       | 0.3395  | 0.2105  | RELN      |
| 7 | rs2237752 | C | T | 0.0625  | 0.3824  | 0.2895  | GRM8      |
| 7 | rs6965133 | A | G | 0.01562 | 0.4048  | 0.25    | RELN      |
| 7 | rs724224  | G | T | 0.8281  | 0.1623  | 0.4688  | GRM3      |
| 7 | rs1048782 |   |   |         |         |         |           |
| 7 | 0         | A | G | 0.07812 | 0.6687  | 0.3947  | NAMPT     |
| 7 | rs1048814 |   |   |         |         |         |           |
| 7 | 2         | T | C | 0.03125 | 0.2326  | 0.02632 | EGFR      |
| 7 | rs1357319 | A | C | 0.7031  | 0.3141  | 0.375   | CYP3A7    |

|   |                |   |   |         |         |         |           |
|---|----------------|---|---|---------|---------|---------|-----------|
| 7 | rs2037498      | G | A | 0.7031  | 0.3494  | 0.4211  | CYP3A7    |
| 7 | rs6953623      | T | C | 0.5312  | 0.1059  | 0.2632  | C7orf16   |
| 7 | rs339054       | T | G | 0.25    | 0.7169  | 0.3421  | CALU      |
| 7 | rs1002397      | A | G | 0.3125  | 0.7035  | 0.3947  | Non-genic |
| 7 | rs1012221      | C | T | 0       | 0.1882  | 0.02632 | DGKB      |
| 7 | rs1014095      | T | C | 0       | 0.3415  | 0.08333 | CUL1      |
| 7 | rs1022884<br>7 | T | C | 0.7656  | 0.8875  | 0.2895  | Non-genic |
| 7 | rs1022893<br>7 | A | G | 0.2031  | 0.512   | 0.2105  | SDK1      |
| 7 | rs1023618<br>3 | T | G | 0.04688 | 0.4942  | 0.1842  | Non-genic |
| 7 | rs1023633<br>7 | G | A | 0.2656  | 0.6118  | 0.2895  | Non-genic |
| 7 | rs1024022<br>2 | C | T | 0.1094  | 0.5349  | 0.2895  | Non-genic |
| 7 | rs1024291<br>3 | A | G | 0.3906  | 0.07558 | 0.2368  | Non-genic |
| 7 | rs1024579<br>4 | T | C | 0.2656  | 0.6988  | 0.1579  | Non-genic |
| 7 | rs1024687<br>2 | G | A | 0.5469  | 0.1646  | 0.4211  | Non-genic |
| 7 | rs1025970<br>3 | G | A | 0.2969  | 0.869   | 0.4737  | Non-genic |
| 7 | rs1027419<br>2 | T | C | 0.5781  | 0.08721 | 0.3684  | Non-genic |
| 7 | rs1027470<br>7 | T | C | 0       | 0.4294  | 0.1053  | GNAI1     |
| 7 | rs1028125<br>2 | G | A | 0.5938  | 0.1928  | 0.3947  | SEMA3D    |
| 7 | rs1048592<br>7 | T | G | 0.3125  | 0.09412 | 0.3684  | MAGI2     |
| 7 | rs1048654<br>9 | C | T | 0       | 0.3519  | 0.07895 | HIBADH    |
| 7 | rs1048672<br>5 | T | C | 0.3125  | 0.06024 | 0.2368  | Non-genic |
| 7 | rs1048677<br>7 | A | C | 0.5938  | 0.8605  | 0.4474  | Non-genic |
| 7 | rs1048677<br>9 | A | C | 0.3125  | 0.05952 | 0.3056  | Non-genic |
| 7 | rs1048678<br>0 | G | A | 0.1875  | 0.7024  | 0.3947  | Non-genic |
| 7 | rs1048680<br>1 | A | G | 0.01562 | 0.2647  | 0.05263 | RALA      |
| 7 | rs1048684<br>7 | A | G | 0       | 0.1463  | 0.02632 | SEMA3D    |
| 7 | rs1048694<br>5 | A | G | 0.07812 | 0.4     | 0.02632 | CACNA2D1  |
| 7 | rs1048702<br>8 | G | T | 0.04688 | 0.4815  | 0.1842  | Non-genic |
| 7 | rs1048722<br>0 | T | C | 0       | 0.4107  | 0.1579  | LHFPL3    |
| 7 | rs1048754<br>5 | G | A | 0.4531  | 0.04118 | 0.3158  | Non-genic |

|   |                |   |   |         |         |         |           |
|---|----------------|---|---|---------|---------|---------|-----------|
| 7 | rs1048755<br>4 | A | G | 0       | 0.2321  | 0.08333 | Non-genic |
| 7 | rs1048762<br>4 | T | C | 0.2656  | 0.6453  | 0.3158  | Non-genic |
| 7 | rs1048776<br>8 | A | G | 0.3281  | 0.05814 | 0.3947  | Non-genic |
| 7 | rs1048799<br>1 | G | A | 0.0625  | 0.3795  | 0.05263 | CDK14     |
| 7 | rs1048800<br>3 | T | C | 0.2969  | 0.3036  | 0.1316  | CDK14     |
| 7 | rs1048802<br>7 | C | T | 0.5     | 0.8704  | 0.5     | ELMO1     |
| 7 | rs1048802<br>8 | G | A | 0.375   | 0.875   | 0.4722  | ELMO1     |
| 7 | rs1048807<br>6 | C | T | 0       | 0.2651  | 0.1053  | Non-genic |
| 7 | rs1048810<br>7 | G | A | 0.4062  | 0.1628  | 0.2895  | AASS      |
| 7 | rs1048811<br>8 | T | C | 0       | 0.3041  | 0.09375 | Non-genic |
| 7 | rs1048819<br>3 | G | A | 0       | 0.2012  | 0.05263 | TMEM106B  |
| 7 | rs1048860<br>9 | T | C | 0.1406  | 0.6037  | 0.3684  | DGKI      |
| 7 | rs1048864<br>2 | G | A | 0.4375  | 0.1512  | 0.3684  | TRIM24    |
| 7 | rs1049943<br>6 | A | G | 0       | 0.2965  | 0.02632 | Non-genic |
| 7 | rs1049948<br>0 | G | A | 0.04688 | 0.3148  | 0.1316  | Non-genic |
| 7 | rs1049980<br>6 | A | G | 0.1562  | 0.7108  | 0.3684  | Non-genic |
| 7 | rs1049992<br>3 | T | C | 0       | 0.1266  | 0       | Non-genic |
| 7 | rs1050000<br>2 | A | G | 0.03125 | 0.3355  | 0.1667  | IMMP2L    |
| 7 | rs1109786      | T | G | 0.4219  | 0.1205  | 0.2778  | Non-genic |
| 7 | rs1120408      | A | G | 0.1406  | 0.6706  | 0.2895  | DGKB      |
| 7 | rs1203739      | A | G | 0.01562 | 0.7012  | 0.2632  | C7orf10   |
| 7 | rs1267622      | A | G | 0.03125 | 0.5824  | 0.2632  | BRAF      |
| 7 | rs1380380      | T | C | 0.09375 | 0.6512  | 0.3421  | TSPAN13   |
| 7 | rs1425119      | T | C | 0.4688  | 0.1453  | 0.3684  | Non-genic |
| 7 | rs1448672      | C | T | 0.01562 | 0.4762  | 0.2105  | Non-genic |
| 7 | rs1456893      | G | A | 0.375   | 0.157   | 0.3421  | Non-genic |
| 7 | rs1524339      | C | A | 0.01562 | 0.2866  | 0.1389  | CNTNAP2   |
| 7 | rs1525653      | G | A | 0.03125 | 0.2892  | 0       | Non-genic |
| 7 | rs1525683      | G | A | 0.5781  | 0.1845  | 0.4211  | Non-genic |
| 7 | rs1544373      | A | G | 0.01562 | 0.2372  | 0.05263 | Non-genic |
| 7 | rs1554774      | T | C | 0.1719  | 0.7073  | 0.3333  | HDAC9     |
| 7 | rs1639239      | C | T | 0.3438  | 0.7143  | 0.3421  | DGKB      |
| 7 | rs16622        | G | A | 0.0625  | 0.1467  | 0.08824 | Non-genic |
| 7 | rs1724528      | T | G | 0       | 0.7558  | 0.3421  | CNTNAP2   |

|   |           |   |   |         |         |         |           |
|---|-----------|---|---|---------|---------|---------|-----------|
| 7 | rs1726597 | A | G | 0.2344  | 0.6353  | 0.3158  | HDAC9     |
| 7 | rs1859289 | C | T | 0.3125  | 0.7118  | 0.4211  | Non-genic |
| 7 | rs1880242 | G | T | 0.07812 | 0.5581  | 0.2105  | Non-genic |
| 7 | rs194825  | A | G | 0       | 0.2907  | 0.1053  | Non-genic |
| 7 | rs2097782 | A | G | 0       | 0.4767  | 0.1316  | Non-genic |
| 7 | rs2107351 | T | C | 0.04688 | 0.4518  | 0.2368  | Non-genic |
| 7 | rs2110871 | G | A | 0.04688 | 0.506   | 0.2222  | MAGI2     |
| 7 | rs2116531 | C | T | 0.1719  | 0.5417  | 0.1944  | DGKB      |
| 7 | rs2140114 | T | C | 0.1207  | 0.5235  | 0.3158  | SDK1      |
| 7 | rs2233402 | A | C | 0.03125 | 0.4096  | 0.2105  | NEUROD6   |
| 7 | rs2244863 | C | T | 0.2969  | 0.7267  | 0.3421  | Non-genic |
| 7 | rs2248842 | A | G | 0.125   | 0.564   | 0.3158  | Non-genic |
| 7 | rs2284215 | G | T | 0.1875  | 0.4882  | 0.07895 | GPR37     |
| 7 | rs2341825 | A | C | 0.7656  | 0.1     | 0.4444  | PLXNA4    |
| 7 | rs2365511 | G | A | 0.07812 | 0.4702  | 0.2368  | RNF32     |
| 7 | rs2365695 | G | T | 0.4844  | 0.07558 | 0.4211  | Non-genic |
| 7 | rs2367090 | A | C | 0.03125 | 0.2467  | 0.1053  | Non-genic |
| 7 | rs2374983 | G | A | 0.1562  | 0.6145  | 0.3158  | PPP1R9A   |
| 7 | rs2521720 | A | G | 0.2969  | 0.872   | 0.4167  | Non-genic |
| 7 | rs2525826 | T | G | 0.6094  | 0.2089  | 0.4211  | Non-genic |
| 7 | rs2526632 | C | A | 0.1875  | 0.5765  | 0.2105  | HDAC9     |
| 7 | rs259139  | A | C | 0.1562  | 0.4231  | 0.08333 | Non-genic |
| 7 | rs2708997 | C | T | 0.1719  | 0.4679  | 0.1667  | Non-genic |
| 7 | rs2728468 | C | T | 0.07812 | 0.3193  | 0.07895 | Non-genic |
| 7 | rs2730257 | C | T | 0.5312  | 0.05294 | 0.4474  | VIPR2     |
| 7 | rs2886792 | T | C | 0.375   | 0.01974 | 0.2632  | SEMA3C    |
| 7 | rs2951367 | G | A | 0.09375 | 0.4706  | 0.2647  | Non-genic |
| 7 | rs321966  | C | T | 0       | 0.2151  | 0.05263 | MAGI2     |
| 7 | rs41690   | T | C | 0.2812  | 0.7267  | 0.3611  | C7orf58   |
| 7 | rs4720954 | C | T | 0.01562 | 0.3803  | 0.1562  | Non-genic |
| 7 | rs4722752 | T | C | 0.3438  | 0.7384  | 0.4444  | JAZF1     |
| 7 | rs4727133 | C | T | 0.5469  | 0.2062  | 0.4474  | KIAA1324L |
| 7 | rs4730287 | G | A | 0       | 0.3512  | 0.1053  | LAMB4     |
| 7 | rs502694  | T | C | 0.1562  | 0.564   | 0.1842  | Non-genic |
| 7 | rs504229  | G | T | 0.5469  | 0.1747  | 0.3684  | Non-genic |
| 7 | rs590246  | G | A | 0.5781  | 0.06977 | 0.3684  | PSMA2     |
| 7 | rs616709  | A | G | 0.1562  | 0.5588  | 0.1842  | Non-genic |
| 7 | rs6415363 | A | G | 0.2656  | 0.5174  | 0.2632  | Non-genic |
| 7 | rs6461503 | T | C | 0.1875  | 0.5872  | 0.2368  | Non-genic |
| 7 | rs6945372 | G | A | 0.7344  | 0.09412 | 0.4722  | PHF14     |
| 7 | rs6957997 | A | C | 0.5625  | 0.07927 | 0.3947  | ELMO1     |
| 7 | rs6969246 | T | C | 0.4688  | 0.03529 | 0.3947  | Non-genic |
| 7 | rs6977312 | A | G | 0.4844  | 0.4939  | 0.4474  | Non-genic |
| 7 | rs719319  | C | T | 0.07812 | 0.5062  | 0.2368  | Non-genic |
| 7 | rs719917  | T | C | 0.5469  | 0.1176  | 0.3824  | Non-genic |
| 7 | rs721347  | T | C | 0.0625  | 0.3647  | 0.1053  | Non-genic |
| 7 | rs723340  | A | G | 0.07812 | 0.5294  | 0.2632  | AUTS2     |
| 7 | rs726369  | T | C | 0.6719  | 0.8056  | 0.375   | Non-genic |

|   |                |   |   |         |         |         |           |
|---|----------------|---|---|---------|---------|---------|-----------|
| 7 | rs7458065      | T | G | 0.04688 | 0.4244  | 0.1842  | Non-genic |
| 7 | rs7777178      | G | A | 0.2031  | 0.5     | 0.3421  | DGKB      |
| 7 | rs7784234      | A | G | 0.2656  | 0.06471 | 0.3056  | Non-genic |
| 7 | rs7785757      | A | G | 0.1094  | 0.6279  | 0.3684  | Non-genic |
| 7 | rs7794184      | C | T | 0.3906  | 0.1139  | 0.3824  | Non-genic |
| 7 | rs7800027      | A | G | 0.01562 | 0.3274  | 0.02632 | DGKB      |
| 7 | rs7800941      | A | G | 0.01562 | 0.1892  | 0       | Non-genic |
| 7 | rs7809986      | G | A | 0.2969  | 0.7059  | 0.5     | MAGI2     |
| 7 | rs801839       | C | T | 0.2344  | 0.6726  | 0.2368  | ZNF804B   |
| 7 | rs848879       | T | C | 0.6094  | 0.2078  | 0.4688  | Non-genic |
| 7 | rs849059       | T | C | 0       | 0.343   | 0.1579  | Non-genic |
| 7 | rs854100       | A | G | 0.0625  | 0.4114  | 0.1579  | Non-genic |
| 7 | rs854104       | A | G | 0.0625  | 0.1667  | 0.02632 | Non-genic |
| 7 | rs854726       | T | C | 0.3125  | 0.686   | 0.3889  | PPP1R9A   |
| 7 | rs92           | C | T | 0.1875  | 0.494   | 0.2895  | Non-genic |
| 7 | rs928923       | T | C | 0.2031  | 0.6163  | 0.3158  | Non-genic |
| 7 | rs9690428      | T | C | 0.2812  | 0.6353  | 0.4167  | Non-genic |
| 7 | rs1022874<br>8 | T | C | 0.2969  | 0.07831 | 0.1053  | MAGI2     |
| 7 | rs1024805<br>1 | C | T | 0.1719  | 0.5824  | 0.3947  | COBL      |
| 7 | rs1027446<br>5 | T | C | 0.7656  | 0.3     | 0.4211  | SDK1      |
| 7 | rs1027820<br>5 | T | C | 0.1094  | 0.5183  | 0.3158  | SDK1      |
| 7 | rs1027995<br>6 | A | G | 0.2188  | 0.1105  | 0.02632 | Non-genic |
| 7 | rs1048588<br>0 | A | G | 0.01562 | 0.1375  | 0.3235  | MAGI2     |
| 7 | rs1048614<br>6 | A | C | 0.4219  | 0.04651 | 0.2105  | THSD7A    |
| 7 | rs1048615<br>8 | C | T | 0.75    | 0.2024  | 0.3889  | COL28A1   |
| 7 | rs1048672<br>2 | C | T | 0.6562  | 0.3171  | 0.25    | Non-genic |
| 7 | rs1048681<br>3 | T | G | 0.5156  | 0.1875  | 0.3158  | C7orf10   |
| 7 | rs1048730<br>2 | G | A | 0.7188  | 0.2235  | 0.4474  | IMMP2L    |
| 7 | rs1048753<br>1 | G | A | 0.03125 | 0.4451  | 0.2778  | Non-genic |
| 7 | rs1048754<br>4 | C | T | 0.75    | 0.2469  | 0.4211  | Non-genic |
| 7 | rs1048755<br>3 | G | A | 0.6562  | 0.1845  | 0.3684  | Non-genic |
| 7 | rs1048779<br>0 | C | T | 0.4844  | 0.1125  | 0.1667  | Non-genic |
| 7 | rs1048781<br>1 | C | T | 0.8594  | 0.8013  | 0.5     | Non-genic |
| 7 | rs1048790<br>1 | T | C | 0.1094  | 0.5655  | 0.3684  | Non-genic |
| 7 | rs1048837      | C | T | 0.8281  | 0.1765  | 0.3421  | PLXNA4    |

|   |                |   |   |         |         |         |           |
|---|----------------|---|---|---------|---------|---------|-----------|
|   | 4              |   |   |         |         |         |           |
| 7 | rs1048840<br>2 | C | T | 0.4062  | 0.08434 | 0.1316  | Non-genic |
| 7 | rs1048860<br>6 | C | T | 0.6094  | 0.1412  | 0.3421  | PTN       |
| 7 | rs1049933<br>5 | T | C | 0.1719  | 0.537   | 0.4167  | SDK1      |
| 7 | rs1050007<br>1 | T | C | 0.07812 | 0.6104  | 0.4722  | Non-genic |
| 7 | rs1382618      | C | T | 0.03125 | 0.512   | 0.3421  | Non-genic |
| 7 | rs1420426      | A | G | 0.2188  | 0.6688  | 0.4722  | ELMO1     |
| 7 | rs1420427      | T | G | 0.4219  | 0.1125  | 0.2368  | ELMO1     |
| 7 | rs1451015      | G | A | 0.125   | 0.5655  | 0.3684  | BBS9      |
| 7 | rs1458549      | T | G | 0.6034  | 0.2569  | 0.3889  | Non-genic |
| 7 | rs1526543      | G | A | 0.07812 | 0.2817  | 0.2143  | THSD7A    |
| 7 | rs1528098      | A | G | 0.5938  | 0.06395 | 0.2368  | DGKI      |
| 7 | rs2074136      | C | T | 0.3906  | 0.0679  | 0.1842  | Non-genic |
| 7 | rs2108780      | C | A | 0       | 0.3837  | 0.3158  | Non-genic |
| 7 | rs2141531      | G | T | 0       | 0.2121  | 0.1579  | Non-genic |
| 7 | rs2189990      | A | G | 0.125   | 0.506   | 0.3684  | Non-genic |
| 7 | rs2191892      | T | C | 0.375   | 0.09036 | 0.2105  | Non-genic |
| 7 | rs2204122      | A | C | 0.8125  | 0.3171  | 0.5     | SDK1      |
| 7 | rs2222689      | G | A | 0       | 0.4085  | 0.2632  | Non-genic |
| 7 | rs2363830      | G | T | 0.4062  | 0.06977 | 0.1842  | DENND2A   |
| 7 | rs2365509      | T | C | 0.09375 | 0.494   | 0.3421  | RNF32     |
| 7 | rs2392151      | C | T | 0.8281  | 0.3961  | 0.5     | Non-genic |
| 7 | rs2707575      | G | A | 0.04688 | 0.5241  | 0.3529  | CNTNAP2   |
| 7 | rs2862797      | G | A | 0.0625  | 0.5     | 0.3158  | ZNF107    |
| 7 | rs2961258      | C | T | 0.07407 | 0.5482  | 0.3158  | Non-genic |
| 7 | rs308143       | T | G | 0.6406  | 0.07792 | 0.2368  | Non-genic |
| 7 | rs308177       | T | C | 0.6562  | 0.07229 | 0.2632  | Non-genic |
| 7 | rs4719328      | A | G | 0.6094  | 0.2384  | 0.3158  | Non-genic |
| 7 | rs4720303      | G | A | 0       | 0.2532  | 0.1471  | VPS41     |
| 7 | rs4726411      | A | C | 0.8125  | 0.2849  | 0.4737  | DPP6      |
| 7 | rs5007445      | C | A | 0.6406  | 0.2436  | 0.2941  | Non-genic |
| 7 | rs509853       | A | G | 0.01562 | 0.3476  | 0.1944  | Non-genic |
| 7 | rs6461856      | T | G | 0.3125  | 0.2321  | 0.2105  | Non-genic |
| 7 | rs6462243      | A | G | 0.6719  | 0.2134  | 0.3889  | SDK1      |
| 7 | rs6462481      | T | C | 0.7344  | 0.3471  | 0.4474  | BBS9      |
| 7 | rs6464907      | T | C | 0.75    | 0.3235  | 0.4737  | Non-genic |
| 7 | rs6956114      | G | A | 0.07812 | 0.7384  | 0.4474  | DOCK4     |
| 7 | rs6964209      | T | C | 0.3906  | 0.1     | 0.2368  | Non-genic |
| 7 | rs6977800      | A | G | 0.2344  | 0.5938  | 0.4737  | COL28A1   |
| 7 | rs720659       | C | A | 0.5312  | 0.2035  | 0.2895  | JAZF1     |
| 7 | rs7777070      | G | A | 0.875   | 0.2267  | 0.4474  | Non-genic |
| 7 | rs7782606      | T | C | 0.5156  | 0.1628  | 0.2222  | CADPS2    |
| 7 | rs7793555      | A | G | 0.4219  | 0.2706  | 0.05263 | SEMA3C    |
| 7 | rs7798423      | G | A | 0.3594  | 0.04321 | 0.2     | MAGI2     |
| 7 | rs7798447      | C | T | 0.2031  | 0.6369  | 0.4474  | Non-genic |

|   |           |   |   |         |         |         |           |
|---|-----------|---|---|---------|---------|---------|-----------|
| 7 | rs7798474 | T | G | 0.1719  | 0.564   | 0.4474  | TTC26     |
| 7 | rs7798970 | A | G | 0.2969  | 0.5733  | 0.4688  | Non-genic |
| 7 | rs7810980 | C | A | 0.5156  | 0.08721 | 0.1842  | HIP1      |
| 7 | rs834767  | G | A | 0.04688 | 0.4753  | 0.3333  | Non-genic |
| 7 | rs953023  | A | G | 0.6094  | 0.2561  | 0.3158  | Non-genic |
| 8 | rs7002063 | A | G | 0.1094  | 0.6744  | 0.2105  | NRG1      |
| 8 | rs2062055 | G | A | 0.125   | 0.5641  | 0.4474  | NRG1      |
| 8 | rs723811  | G | A | 0.5     | 0.1279  | 0.2895  | NRG1      |
| 8 | rs1050360 |   |   |         |         |         |           |
| 8 | 7         | T | G | 0.3594  | 0.08235 | 0.2632  | PCM1      |
| 8 | rs1057187 | G | T | 0.7656  | 0.4114  | 0.4474  | MCPH1     |
| 8 | rs2034143 | A | G | 0.75    | 0.2035  | 0.3421  | MCPH1     |
| 8 | rs208756  | C | A | 0.5938  | 0.2151  | 0.3947  | PCM1      |
| 8 | rs2019726 | C | T | 0.3     | 0.3393  | 0.1111  | WRN       |
| 8 | rs2957457 | C | T | 0       | 0.3353  | 0.1053  | ZFPM2     |
| 8 | rs1027479 | T | C | 0.09375 | 0.6728  | 0.3056  | Non-genic |
| 8 | rs1030080 | A | G | 0.1562  | 0.5465  | 0.3158  | Non-genic |
| 8 | rs1050323 |   |   |         |         |         |           |
| 8 | 8         | G | A | 0       | 0.45    | 0.1944  | CSMD1     |
| 8 | rs1050329 |   |   |         |         |         |           |
| 8 | 6         | G | A | 0.01562 | 0.3471  | 0.1579  | CSMD1     |
| 8 | rs1050330 |   |   |         |         |         |           |
| 8 | 4         | A | G | 0.09375 | 0.506   | 0.2222  | Non-genic |
| 8 | rs1050330 |   |   |         |         |         |           |
| 8 | 5         | C | A | 0.2188  | 0.5443  | 0.25    | Non-genic |
| 8 | rs1050361 |   |   |         |         |         |           |
| 8 | 6         | C | T | 0       | 0.1883  | 0.08824 | PSD3      |
| 8 | rs1050384 |   |   |         |         |         |           |
| 8 | 7         | G | A | 0.03125 | 0.3605  | 0.1053  | Non-genic |
| 8 | rs1050387 |   |   |         |         |         |           |
| 8 | 3         | C | T | 0.01562 | 0.4535  | 0.1316  | GTF2E2    |
| 8 | rs1050399 |   |   |         |         |         |           |
| 8 | 1         | A | G | 0.4375  | 0.68    | 0.3235  | Non-genic |
| 8 | rs1050400 |   |   |         |         |         |           |
| 8 | 9         | C | T | 0.25    | 0.7733  | 0.4737  | Non-genic |
| 8 | rs1050404 |   |   |         |         |         |           |
| 8 | 8         | T | C | 0.3125  | 0.04651 | 0.3158  | MYST3     |
| 8 | rs1050419 |   |   |         |         |         |           |
| 8 | 7         | T | G | 0.04688 | 0.3333  | 0.07895 | Non-genic |
| 8 | rs1050471 |   |   |         |         |         |           |
| 8 | 7         | G | A | 0.4375  | 0.1437  | 0.4474  | ZNF704    |
| 8 | rs1050471 |   |   |         |         |         |           |
| 8 | 9         | T | G | 0.4375  | 0.1104  | 0.4412  | ZNF704    |
| 8 | rs1050479 |   |   |         |         |         |           |
| 8 | 2         | T | C | 0.04688 | 0.18    | 0.0625  | RALYL     |
| 8 | rs1050482 |   |   |         |         |         |           |
| 8 | 6         | G | A | 0.1094  | 0.8471  | 0.3684  | CNGB3     |
| 8 | rs1050482 |   |   |         |         |         |           |
| 8 | 8         | G | T | 0.25    | 0.6402  | 0.3947  | CNBD1     |
| 8 | rs1050488 |   |   |         |         |         |           |
| 8 | 5         | A | C | 0.4844  | 0.1084  | 0.4167  | NBN       |
| 8 | rs1050490 |   |   |         |         |         |           |
| 8 | 4         | G | A | 0.1406  | 0.4405  | 0.1842  | SLC26A7   |



|   |                |   |   |         |         |         |           |
|---|----------------|---|---|---------|---------|---------|-----------|
| 8 | rs1050498<br>3 | T | G | 0.4844  | 0.128   | 0.4211  | LAPTM4B   |
| 8 | rs1050510<br>5 | A | G | 0.03125 | 0.2     | 0.1111  | ANGPT1    |
| 8 | rs1050519<br>7 | T | C | 0.3594  | 0.05625 | 0.2632  | CSMD3     |
| 8 | rs1050520<br>5 | C | T | 0.0625  | 0.4226  | 0.2105  | Non-genic |
| 8 | rs1050555<br>9 | T | C | 0.03125 | 0.3895  | 0.1316  | Non-genic |
| 8 | rs1050556<br>0 | C | T | 0.01562 | 0.2531  | 0.05263 | Non-genic |
| 8 | rs1110854      | T | C | 0.1719  | 0.5988  | 0.2368  | Non-genic |
| 8 | rs1362911      | A | C | 0.6406  | 0.1221  | 0.4211  | PURG      |
| 8 | rs1378415      | T | C | 0.4062  | 0.1     | 0.4211  | Non-genic |
| 8 | rs1390049      | G | A | 0       | 0.3133  | 0.08333 | Non-genic |
| 8 | rs1402513      | T | C | 0.04688 | 0.5361  | 0.25    | Non-genic |
| 8 | rs1444492      | G | A | 0       | 0.4882  | 0.2368  | Non-genic |
| 8 | rs1477556      | C | T | 0.2969  | 0.657   | 0.4737  | CPA6      |
| 8 | rs1483821      | G | A | 0.4219  | 0.125   | 0.3611  | Non-genic |
| 8 | rs1488024      | G | A | 0.4688  | 0.09302 | 0.3125  | Non-genic |
| 8 | rs1587014      | C | A | 0.4844  | 0.1145  | 0.3158  | Non-genic |
| 8 | rs1603681      | A | G | 0.01562 | 0.407   | 0.1579  | Non-genic |
| 8 | rs1688071<br>5 | G | T | 0.1406  | 0.7535  | 0.3421  | Non-genic |
| 8 | rs1714757      | C | A | 0.0625  | 0.5854  | 0.2105  | CSMD1     |
| 8 | rs1873547      | A | G | 0.125   | 0.4826  | 0.1842  | SLCO5A1   |
| 8 | rs1880014      | T | C | 0.1875  | 0.5312  | 0.2812  | Non-genic |
| 8 | rs1913653      | C | T | 0.2656  | 0.443   | 0.09375 | Non-genic |
| 8 | rs1962044      | T | C | 0       | 0.3072  | 0       | Non-genic |
| 8 | rs196885       | C | T | 0.4062  | 0.1131  | 0.4444  | Non-genic |
| 8 | rs2014286      | A | G | 0.7656  | 0.08721 | 0.4474  | EFHA2     |
| 8 | rs2097585      | T | C | 0.07812 | 0.6325  | 0.2895  | Non-genic |
| 8 | rs2132167      | A | G | 0.4219  | 0.7616  | 0.4167  | Non-genic |
| 8 | rs2163120      | C | T | 0.5625  | 0.04167 | 0.3158  | Non-genic |
| 8 | rs2256827      | T | C | 0.07812 | 0.5706  | 0.2895  | Non-genic |
| 8 | rs2318832      | A | C | 0.1875  | 0.7798  | 0.3684  | Non-genic |
| 8 | rs2385545      | C | T | 0.1875  | 0.7151  | 0.4444  | Non-genic |
| 8 | rs2410373      | C | A | 0.1406  | 0.5529  | 0.2368  | Non-genic |
| 8 | rs2582454      | C | T | 0.6406  | 0.1337  | 0.4737  | Non-genic |
| 8 | rs2610118      | T | C | 0.04688 | 0.6395  | 0.2778  | Non-genic |
| 8 | rs2613841      | C | T | 0       | 0.5529  | 0.2105  | Non-genic |
| 8 | rs284494       | G | A | 0.625   | 0.1645  | 0.4688  | Non-genic |
| 8 | rs284495       | T | C | 0.3438  | 0.7727  | 0.3611  | Non-genic |
| 8 | rs2853255      | A | G | 0.1875  | 0.5294  | 0.2895  | -         |
| 8 | rs285809       | C | T | 0       | 0.3289  | 0.0625  | Non-genic |
| 8 | rs2979269      | G | A | 0.2188  | 0.494   | 0.2222  | Non-genic |
| 8 | rs3015796      | C | T | 0.1406  | 0.6395  | 0.2895  | Non-genic |
| 8 | rs3925055      | C | T | 0.625   | 0.1494  | 0.4118  | Non-genic |
| 8 | rs425140       | A | G | 0.03125 | 0.3895  | 0.1842  | Non-genic |

|   |                |   |   |         |         |         |           |
|---|----------------|---|---|---------|---------|---------|-----------|
| 8 | rs4286925      | G | A | 0       | 0.5062  | 0.2222  | Non-genic |
| 8 | rs532398       | G | T | 0       | 0.2824  | 0.07895 | Non-genic |
| 8 | rs6470858      | A | G | 0       | 0.3819  | 0.09375 | SLC7A13   |
| 8 | rs6981145      | C | T | 0.2344  | 0.5412  | 0.1579  | Non-genic |
| 8 | rs6983307      | A | G | 0.2812  | 0.8081  | 0.4474  | ST18      |
| 8 | rs7000419      | A | G | 0.3125  | 0.7674  | 0.3421  | Non-genic |
| 8 | rs7017679      | G | A | 0.3906  | 0.7083  | 0.3158  | Non-genic |
| 8 | rs718121       | C | T | 0.1094  | 0.6265  | 0.3611  | CSMD1     |
| 8 | rs723231       | A | C | 0.3438  | 0.09877 | 0.3947  | Non-genic |
| 8 | rs7816962      | C | T | 0.07812 | 0.4529  | 0.2632  | Non-genic |
| 8 | rs7818967      | C | T | 0       | 0.2342  | 0.08824 | Non-genic |
| 8 | rs870215       | A | G | 0.5156  | 0.09884 | 0.4474  | SLC39A14  |
| 8 | rs903717       | T | C | 0.5938  | 0.9639  | 0.4474  | Non-genic |
| 8 | rs925940       | C | T | 0.2656  | 0.7024  | 0.4737  | Non-genic |
| 8 | rs9297533      | A | G | 0.6406  | 0.8155  | 0.3824  | Non-genic |
| 8 | rs9297643      | G | A | 0.03125 | 0.3148  | 0.07895 | Non-genic |
| 8 | rs9314338      | A | G | 0.04688 | 0.3547  | 0.1316  | Non-genic |
| 8 | rs9314455      | A | G | 0.2656  | 0.6765  | 0.3684  | Non-genic |
| 8 | rs9325782      | C | T | 0.4219  | 0.04167 | 0.2632  | Non-genic |
| 8 | rs1035746      | A | G | 0.6562  | 0.247   | 0.3889  | Non-genic |
| 8 | rs1050317<br>3 | A | G | 0.2969  | 0.04706 | 0.1316  | Non-genic |
| 8 | rs1050317<br>4 | G | A | 0.5312  | 0.08721 | 0.2368  | Non-genic |
| 8 | rs1050334<br>7 | C | T | 0.03125 | 0.5235  | 0.3889  | Non-genic |
| 8 | rs1050358<br>5 | C | T | 0.2031  | 0.6765  | 0.4737  | Non-genic |
| 8 | rs1050432<br>6 | C | T | 0.1719  | 0.5854  | 0.3947  | CLVS1     |
| 8 | rs1050447<br>8 | C | T | 0.5     | 0.1279  | 0.2632  | Non-genic |
| 8 | rs1050461<br>9 | A | G | 0.4844  | 0.1513  | 0.2812  | Non-genic |
| 8 | rs1050467<br>1 | G | A | 0       | 0.2143  | 0.2059  | Non-genic |
| 8 | rs1050469<br>6 | A | G | 0.8906  | 0.2706  | 0.5     | Non-genic |
| 8 | rs1050486<br>7 | G | T | 0       | 0.3446  | 0.3333  | Non-genic |
| 8 | rs1050490<br>2 | A | G | 0.3438  | 0.05233 | 0.05263 | NECAB1    |
| 8 | rs1050491<br>5 | G | A | 0.06452 | 0.4321  | 0.2632  | Non-genic |
| 8 | rs1050498<br>9 | T | C | 0       | 0.58    | 0.3333  | VPS13B    |
| 8 | rs1050511<br>1 | G | A | 0.375   | 0.05952 | 0.1176  | Non-genic |
| 8 | rs1050513<br>6 | T | C | 0.2188  | 0.025   | 0.02778 | Non-genic |
| 8 | rs1050529<br>3 | A | G | 0.75    | 0.241   | 0.3947  | Non-genic |

|   |                |   |   |         |         |        |           |
|---|----------------|---|---|---------|---------|--------|-----------|
| 8 | rs1050536<br>4 | G | A | 0.125   | 0.6471  | 0.4444 | Non-genic |
| 8 | rs1050548<br>1 | A | G | 0.6719  | 0.2976  | 0.3421 | Non-genic |
| 8 | rs1050560<br>6 | T | C | 0.4219  | 0.09302 | 0.1579 | NDRG1     |
| 8 | rs1050566<br>5 | A | G | 0.4531  | 0.1337  | 0.2368 | Non-genic |
| 8 | rs1073068      | G | T | 0.7031  | 0.2922  | 0.4444 | SGCZ      |
| 8 | rs1346729      | T | C | 0.625   | 0.179   | 0.3684 | Non-genic |
| 8 | rs1377882      | T | G | 0.5938  | 0.2118  | 0.2368 | Non-genic |
| 8 | rs1383160      | T | G | 0.5     | 0.1807  | 0.1842 | Non-genic |
| 8 | rs1384039      | C | A | 0.01562 | 0.4244  | 0.2895 | Non-genic |
| 8 | rs1397371      | G | T | 0.5312  | 0.03488 | 0.2632 | Non-genic |
| 8 | rs1425058      | G | A | 0.5938  | 0.189   | 0.2647 | Non-genic |
| 8 | rs1425903      | G | A | 0.5625  | 0.1294  | 0.2632 | Non-genic |
| 8 | rs1435282      | G | A | 0.125   | 0.6977  | 0.4474 | Non-genic |
| 8 | rs1444027      | A | G | 0       | 0.5529  | 0.3158 | Non-genic |
| 8 | rs1447207      | C | T | 0.6774  | 0.2025  | 0.3684 | Non-genic |
| 8 | rs1454953      | T | C | 0.5781  | 0.1744  | 0.3158 | DLC1      |
| 8 | rs1596434      | G | A | 0.125   | 0.6299  | 0.3947 | Non-genic |
| 8 | rs1607545      | A | G | 0       | 0.2372  | 0.1842 | Non-genic |
| 8 | rs1991718      | T | C | 0.5625  | 0.1882  | 0.3158 | KCNQ3     |
| 8 | rs1992203      | T | G | 0.01562 | 0.3354  | 0.3158 | CSMD1     |
| 8 | rs1992721      | G | A | 0.1562  | 0.5     | 0.3889 | ENPP2     |
| 8 | rs2170116      | A | G | 0.7344  | 0.1471  | 0.4211 | Non-genic |
| 8 | rs2175306      | C | T | 0.2656  | 0.09036 | 0.1111 | Non-genic |
| 8 | rs2290471      | G | A | 0.5156  | 0.1395  | 0.3158 | MATN2     |
| 8 | rs2316692      | T | G | 0.5156  | 0.09524 | 0.2105 | Non-genic |
| 8 | rs2319928      | A | G | 0.7656  | 0.35    | 0.4737 | -         |
| 8 | rs2339228      | A | G | 0.875   | 0.4691  | 0.4737 | Non-genic |
| 8 | rs2623825      | T | C | 0.01562 | 0.226   | 0.1471 | Non-genic |
| 8 | rs2627490      | G | A | 0.75    | 0.3554  | 0.4167 | CSMD1     |
| 8 | rs285402       | T | C | 0.8125  | 0.3598  | 0.4722 | Non-genic |
| 8 | rs2883470      | T | C | 0.6719  | 0.1882  | 0.3611 | Non-genic |
| 8 | rs2928579      | T | C | 0       | 0.343   | 0.2895 | AGPAT5    |
| 8 | rs2939655      | A | G | 0.1562  | 0.5235  | 0.3421 | XKR4      |
| 8 | rs2980817      | G | A | 0.0625  | 0.5     | 0.3421 | Non-genic |
| 8 | rs3110150      | A | G | 0.1562  | 0.5176  | 0.5    | Non-genic |
| 8 | rs3133724      | T | C | 0.07812 | 0.4819  | 0.3056 | Non-genic |
| 8 | rs323372       | G | A | 0.6094  | 0.2048  | 0.2895 | Non-genic |
| 8 | rs4128469      | A | G | 0.07812 | 0.4419  | 0.3158 | Non-genic |
| 8 | rs416011       | C | T | 0.1406  | 0.4688  | 0.3158 | Non-genic |
| 8 | rs4284070      | A | G | 0.3594  | 0.09259 | 0.1471 | Non-genic |
| 8 | rs4593549      | A | G | 0.6875  | 0.2326  | 0.3684 | SLC25A37  |
| 8 | rs4639531      | C | T | 0.4062  | 0.1111  | 0.1667 | Non-genic |
| 8 | rs4732617      | G | A | 0.03125 | 0.2381  | 0.2105 | SCARA5    |
| 8 | rs4733809      | C | T | 0.6875  | 0.2151  | 0.4211 | Non-genic |
| 8 | rs6468274      | C | A | 0.04688 | 0.5361  | 0.3421 | Non-genic |

|   |                |   |   |         |         |         |           |
|---|----------------|---|---|---------|---------|---------|-----------|
| 8 | rs6469563      | C | T | 0.125   | 0.5407  | 0.4737  | Non-genic |
| 8 | rs6601578      | A | G | 0.09375 | 0.4941  | 0.3421  | Non-genic |
| 8 | rs6651173      | A | G | 0.4844  | 0.1765  | 0.2632  | KCNQ3     |
| 8 | rs6984427      | T | C | 0       | 0.5756  | 0.3421  | PXDNL     |
| 8 | rs6991428      | C | T | 0.625   | 0.2294  | 0.2368  | CSMD1     |
| 8 | rs6994019      | G | T | 0.2031  | 0.6627  | 0.5     | MMP16     |
| 8 | rs7009724      | G | T | 0.75    | 0.2901  | 0.3333  | Non-genic |
| 8 | rs7011741      | A | G | 0.0625  | 0.375   | 0.2895  | Non-genic |
| 8 | rs7017610      | A | G | 0.09375 | 0.7381  | 0.4211  | Non-genic |
| 8 | rs720131       | A | G | 0.6875  | 0.2952  | 0.4474  | Non-genic |
| 8 | rs7829511      | G | A | 0.8906  | 0.5059  | 0.3333  | Non-genic |
| 8 | rs7832475      | C | T | 0.7969  | 0.1919  | 0.3947  | SAMD12    |
| 8 | rs7833413      | G | A | 0.3438  | 0.04651 | 0.1579  | SDCBP     |
| 8 | rs7837830      | G | A | 0.4219  | 0.09884 | 0.2105  | CSMD1     |
| 8 | rs7844834      | A | C | 0.6094  | 0.1802  | 0.2895  | FAM167A   |
| 8 | rs899427       | A | G | 0.75    | 0.1118  | 0.3684  | Non-genic |
| 8 | rs921777       | A | G | 0.5     | 0.157   | 0.1579  | Non-genic |
| 8 | rs926135       | C | T | 0.4375  | 0.1266  | 0.2778  | Non-genic |
| 8 | rs9314465      | G | T | 0.6562  | 0.1533  | 0.3684  | Non-genic |
| 8 | rs9325747      | A | C | 0.4688  | 0.1627  | 0.2105  | SGCZ      |
| 8 | rs949988       | A | G | 0.3438  | 0.05952 | 0.1579  | Non-genic |
| 8 | rs969160       | C | T | 0.625   | 0.157   | 0.3684  | Non-genic |
| 9 | rs1927914      | A | G | 0.1094  | 0.6337  | 0.4444  | TLR4      |
| 9 | rs2304779      | C | T | 0.01562 | 0.2267  | 0.07895 | IKBKAP    |
| 9 | rs1049151<br>6 | G | A | 0.01562 | 0.4535  | 0.2222  | Non-genic |
| 9 | rs1049158<br>4 | G | A | 0.5     | 0.02941 | 0.3421  | DMRT1     |
| 9 | rs1049159<br>0 | T | C | 0.4844  | 0.1105  | 0.3611  | KANK1     |
| 9 | rs1049164<br>7 | A | G | 0       | 0.2202  | 0.1053  | C9orf46   |
| 9 | rs1051151<br>1 | T | C | 0.01562 | 0.3038  | 0.05882 | PTPRD     |
| 9 | rs1051152<br>8 | C | T | 0.2031  | 0.75    | 0.3947  | PTPRD     |
| 9 | rs1051162<br>1 | T | C | 0.5625  | 0.09146 | 0.3684  | BNC2      |
| 9 | rs1051188<br>5 | G | A | 0.2031  | 0.5864  | 0.3947  | Non-genic |
| 9 | rs1051188<br>8 | A | G | 0.1094  | 0.4259  | 0.2222  | Non-genic |
| 9 | rs1051190<br>5 | G | A | 0.03125 | 0.3086  | 0.02941 | Non-genic |
| 9 | rs1051194<br>5 | C | T | 0.3594  | 0.7353  | 0.4474  | Non-genic |
| 9 | rs1051195<br>8 | C | T | 0.4531  | 0.04706 | 0.3056  | PGM5      |
| 9 | rs1051204<br>0 | C | T | 0.1562  | 0.6867  | 0.2368  | Non-genic |
| 9 | rs1051216<br>8 | G | A | 0.07812 | 0.4412  | 0.1316  | Non-genic |

|   |                |   |   |         |         |         |           |
|---|----------------|---|---|---------|---------|---------|-----------|
| 9 | rs1051223<br>0 | T | G | 0       | 0.3353  | 0.07895 | Non-genic |
| 9 | rs1051227<br>3 | G | A | 0.1719  | 0.4128  | 0.07895 | Non-genic |
| 9 | rs1051240<br>2 | A | G | 0.3594  | 0.09884 | 0.3158  | AKAP2     |
| 9 | rs1051334<br>2 | G | A | 0       | 0.3631  | 0.05263 | Non-genic |
| 9 | rs1051341<br>3 | C | T | 0       | 0.3721  | 0.1053  | Non-genic |
| 9 | rs1051347<br>3 | A | G | 0       | 0.3704  | 0.08333 | RALGPS1   |
| 9 | rs1052108<br>3 | C | A | 0.03125 | 0.3133  | 0.1579  | RAD23B    |
| 9 | rs1330823      | C | T | 0.01562 | 0.6438  | 0.1944  | Non-genic |
| 9 | rs1333107      | C | T | 0.4219  | 0.6375  | 0.4737  | PTPRD     |
| 9 | rs1342022      | A | G | 0.2969  | 0.6647  | 0.4737  | Non-genic |
| 9 | rs1372338      | C | T | 0       | 0.3721  | 0.1579  | ASTN2     |
| 9 | rs1396634      | C | T | 0.5     | 0.1176  | 0.3158  | Non-genic |
| 9 | rs1407972      | C | T | 0.4844  | 0.8077  | 0.3824  | PTPRD     |
| 9 | rs1412096      | A | C | 0.03125 | 0.3397  | 0.05556 | PTPRD     |
| 9 | rs1412184      | C | T | 0.3906  | 0.7176  | 0.3158  | Non-genic |
| 9 | rs1576161      | T | G | 0.3594  | 0.1337  | 0.4737  | Non-genic |
| 9 | rs1832325      | G | A | 0.2969  | 0.08721 | 0.4211  | Non-genic |
| 9 | rs1855217      | T | C | 0.4844  | 0.5685  | 0.3125  | PTPRD     |
| 9 | rs1889340      | C | A | 0.1719  | 0.6118  | 0.3158  | Non-genic |
| 9 | rs1928415      | C | T | 0.2188  | 0.7616  | 0.3684  | KANK1     |
| 9 | rs1930021      | T | C | 0.04688 | 0.3375  | 0.1316  | Non-genic |
| 9 | rs1980874      | A | G | 0.625   | 0.1221  | 0.3947  | AKAP2     |
| 9 | rs1983975      | A | G | 0.4062  | 0.04762 | 0.3684  | Non-genic |
| 9 | rs2009991      | T | C | 0.03125 | 0.3721  | 0.1316  | Non-genic |
| 9 | rs204190       | T | G | 0.375   | 0.7952  | 0.4706  | Non-genic |
| 9 | rs2095121      | A | G | 0.2656  | 0.03488 | 0.2368  | GABBR2    |
| 9 | rs2146079      | A | G | 0.25    | 0.6047  | 0.3158  | DNAJC25   |
| 9 | rs2147248      | G | A | 0.2656  | 0.02941 | 0.2105  | Non-genic |
| 9 | rs2185935      | T | C | 0.0625  | 0.3488  | 0.1579  | Non-genic |
| 9 | rs2300939      | T | C | 0.375   | 0.03529 | 0.2632  | C5        |
| 9 | rs2769612      | C | T | 0.2188  | 0.6235  | 0.3611  | Non-genic |
| 9 | rs2900142      | T | C | 0.1719  | 0.4684  | 0.1842  | Non-genic |
| 9 | rs3176757      | A | G | 0.01562 | 0.3882  | 0.1316  | NCPB1     |
| 9 | rs328018       | T | C | 0.7188  | 0.1118  | 0.4737  | SLC44A1   |
| 9 | rs4135188      | C | T | 0       | 0.3393  | 0.1389  | TXN       |
| 9 | rs4348562      | T | G | 0.5938  | 0.1084  | 0.4211  | Non-genic |
| 9 | rs4440695      | T | C | 0.3594  | 0.03571 | 0.3158  | Non-genic |
| 9 | rs4743707      | A | G | 0.2344  | 0.561   | 0.3421  | Non-genic |
| 9 | rs4879382      | A | C | 0.1094  | 0.5064  | 0.2812  | Non-genic |
| 9 | rs4977824      | C | T | 0.1719  | 0.7662  | 0.4412  | Non-genic |
| 9 | rs590086       | T | C | 0.2188  | 0.8452  | 0.3684  | ASS1      |
| 9 | rs670410       | C | T | 0.1094  | 0.8023  | 0.3947  | RALGPS1   |
| 9 | rs7024617      | T | C | 0.2656  | 0.05233 | 0.3158  | Non-genic |

|   |                |   |   |         |         |         |           |
|---|----------------|---|---|---------|---------|---------|-----------|
| 9 | rs7026716      | G | A | 0.09375 | 0.2674  | 0.07895 | KANK1     |
| 9 | rs7041743      | C | T | 0.4062  | 0.09036 | 0.4444  | ASTN2     |
| 9 | rs721905       | C | T | 0.1094  | 0.4747  | 0.2368  | Non-genic |
| 9 | rs7862716      | C | T | 0.2812  | 0.7294  | 0.5     | FREM1     |
| 9 | rs7869364      | G | T | 0       | 0.2229  | 0.07895 | GABBR2    |
| 9 | rs9299022      | G | A | 0.1562  | 0.6529  | 0.3947  | Non-genic |
| 9 | rs966390       | A | G | 0.2656  | 0.561   | 0.3333  | Non-genic |
| 9 | rs968079       | A | G | 0.4375  | 0.7424  | 0.5     | PTPRD     |
| 9 | rs1049152<br>6 | G | A | 0.5625  | 0.2342  | 0.2308  | Non-genic |
| 9 | rs1051197<br>4 | G | A | 0.9062  | 0.3929  | 0.4474  | C9orf135  |
| 9 | rs1051201<br>4 | C | T | 0       | 0.4337  | 0.2647  | Non-genic |
| 9 | rs1051481<br>5 | C | A | 0.2188  | 0.7143  | 0.5     | ECM2      |
| 9 | rs1051481<br>9 | T | C | 0.4844  | 0.08642 | 0.2105  | Non-genic |
| 9 | rs1389563      | T | C | 0       | 0.5179  | 0.3421  | KANK1     |
| 9 | rs1399428      | T | C | 0.125   | 0.5064  | 0.4444  | Non-genic |
| 9 | rs1452336      | A | G | 0.09375 | 0.5116  | 0.3684  | LINGO2    |
| 9 | rs1536521      | T | C | 0.6719  | 0.1529  | 0.3684  | Non-genic |
| 9 | rs1746154      | A | G | 0.4688  | 0.1     | 0.1842  | Non-genic |
| 9 | rs1831266      | T | G | 0.5625  | 0.1977  | 0.1579  | DOCK8     |
| 9 | rs1885429      | T | C | 0       | 0.3784  | 0.2368  | Non-genic |
| 9 | rs192703       | T | C | 0.125   | 0.686   | 0.4474  | Non-genic |
| 9 | rs1933580      | T | C | 0.7656  | 0.25    | 0.5     | Non-genic |
| 9 | rs1953805      | C | A | 0       | 0.375   | 0.3158  | Non-genic |
| 9 | rs1998976      | A | C | 0.5156  | 0.03125 | 0.25    | RFX3      |
| 9 | rs2027005      | T | G | 0.75    | 0.2798  | 0.4737  | TLE4      |
| 9 | rs2149814      | C | A | 0.5     | 0.2035  | 0.2105  | Non-genic |
| 9 | rs2197008      | G | A | 0.09375 | 0.6012  | 0.4167  | Non-genic |
| 9 | rs2282039      | T | G | 0       | 0.2294  | 0.1316  | Non-genic |
| 9 | rs2309741      | G | A | 0.07812 | 0.526   | 0.3333  | TRPM3     |
| 9 | rs2641998      | C | A | 0       | 0.5353  | 0.3421  | KANK1     |
| 9 | rs2804284      | G | A | 0.1094  | 0.5176  | 0.4211  | KANK1     |
| 9 | rs4319185      | T | C | 0.4688  | 0.1395  | 0.1579  | UBAP1     |
| 9 | rs439269       | T | C | 0.5938  | 0.08434 | 0.2105  | Non-genic |
| 9 | rs4461995      | C | T | 0.3594  | 0.1013  | 0.1875  | Non-genic |
| 9 | rs4625093      | A | G | 0.07812 | 0.4477  | 0.3421  | Non-genic |
| 9 | rs4743380      | G | A | 0.2969  | 0.6786  | 0.5     | ERP44     |
| 9 | rs4977848      | A | G | 0.03125 | 0.3412  | 0.25    | KIAA1797  |
| 9 | rs4977867      | A | G | 0.8906  | 0.8026  | 0.4375  | Non-genic |
| 9 | rs586348       | G | A | 0.01562 | 0.5523  | 0.3947  | Non-genic |
| 9 | rs6560277      | C | T | 0.09375 | 0.5116  | 0.3421  | Non-genic |
| 9 | rs7019271      | G | A | 0.5156  | 0.1706  | 0.3158  | Non-genic |
| 9 | rs7020261      | G | A | 0.5156  | 0.1163  | 0.25    | DOCK8     |
| 9 | rs7021834      | T | C | 0.4375  | 0.1131  | 0.1579  | Non-genic |
| 9 | rs7030035      | T | C | 0.03125 | 0.3614  | 0.2105  | GDA       |
| 9 | rs7032778      | A | G | 0.7031  | 0.3072  | 0.4737  | DOCK8     |

|    |                |   |   |         |         |         |           |
|----|----------------|---|---|---------|---------|---------|-----------|
| 9  | rs7034018      | T | C | 0.5938  | 0.1628  | 0.1316  | Non-genic |
| 9  | rs7041758      | T | C | 0.5312  | 0.1471  | 0.2895  | Non-genic |
| 9  | rs718447       | A | G | 0.5781  | 0.2561  | 0.3333  | TRPM3     |
| 9  | rs719535       | T | C | 0.1719  | 0.5714  | 0.4737  | ASTN2     |
| 9  | rs724248       | T | C | 0.1562  | 0.5581  | 0.3684  | Non-genic |
| 9  | rs7850256      | T | C | 0.04688 | 0.3735  | 0.3667  | Non-genic |
| 9  | rs7872034      | G | A | 0.1719  | 0.5494  | 0.3947  | SMC2      |
| 9  | rs787887       | G | A | 0.625   | 0.247   | 0.2895  | C9orf171  |
| 9  | rs9299118      | A | G | 0.03125 | 0.1818  | 0.3077  | Non-genic |
| 9  | rs955387       | A | G | 0       | 0.1714  | 0.2692  | Non-genic |
| 9  | rs998599       | G | A | 0.2344  | 0.5526  | 0.4062  | SH3GL2    |
| 10 | rs7073119      | A | G | 0.2031  | 0.6071  | 0.4444  | GAD2      |
| 10 | rs7093376      | A | G | 0.1406  | 0.7882  | 0.2778  | NRG3      |
| 10 | rs1649940      | C | T | 0.4844  | 0.1481  | 0.2105  | NRG3      |
| 10 | rs2207782      | G | A | 0.1094  | 0.6329  | 0.4706  | NRG3      |
| 10 | rs7069222      | G | A | 0.125   | 0.5952  | 0.4211  | NRG3      |
| 10 | rs4406737      | A | G | 0.6875  | 0.3393  | 0.4211  | FAS       |
| 10 | rs1049097<br>5 | G | T | 0.5     | 0.8706  | 0.5     | PRKG1     |
| 10 | rs3781001      | T | C | 0.2031  | 0.4813  | 0.3125  | ADAM12    |
| 10 | rs1050895<br>8 | C | A | 0.07812 | 0.4383  | 0.2647  | PRKG1     |
| 10 | rs7922269      | G | T | 0.04688 | 0.4451  | 0.3158  | LIPA      |
| 10 | rs960941       | G | A | 0.6406  | 0.07143 | 0.4412  | NEBL      |
| 10 | rs2505535      | A | G | 0       | 0.3294  | 0.05263 | RET       |
| 10 | rs1049103<br>0 | G | A | 0.2344  | 0.5581  | 0.2368  | Non-genic |
| 10 | rs1049486<br>7 | C | A | 0.3594  | 0.7917  | 0.4211  | Non-genic |
| 10 | rs1050820<br>1 | C | T | 0.03125 | 0.2558  | 0.02632 | ZMYND11   |
| 10 | rs1050824<br>5 | T | G | 0.04688 | 0.3198  | 0.1053  | PFKP      |
| 10 | rs1050829<br>5 | C | T | 0       | 0.2907  | 0.1053  | C10orf18  |
| 10 | rs1050836<br>2 | G | A | 0.5     | 0.66    | 0.4643  | Non-genic |
| 10 | rs1050837<br>9 | G | A | 0.1562  | 0.5893  | 0.3421  | Non-genic |
| 10 | rs1050847<br>1 | A | G | 0.07812 | 0.4529  | 0.1316  | FRMD4A    |
| 10 | rs1050848<br>6 | A | G | 0.0625  | 0.6221  | 0.1842  | Non-genic |
| 10 | rs1050850<br>6 | A | G | 0.3594  | 0.6686  | 0.3947  | Non-genic |
| 10 | rs1050852<br>3 | T | C | 0.01562 | 0.3155  | 0.1579  | ST8SIA6   |
| 10 | rs1050858<br>1 | T | C | 0.4688  | 0.1543  | 0.3889  | Non-genic |
| 10 | rs1050861<br>3 | G | A | 0.4219  | 0.1047  | 0.4211  | PLXDC2    |
| 10 | rs1050866      | T | C | 0.1406  | 0.488   | 0.1316  | KIAA1217  |

|    |                |   |   |         |         |         |           |
|----|----------------|---|---|---------|---------|---------|-----------|
|    | 9              |   |   |         |         |         |           |
| 10 | rs1050868<br>3 | A | G | 0.2812  | 0.9702  | 0.5     | Non-genic |
| 10 | rs1050869<br>5 | T | C | 0.5     | 0.1667  | 0.4722  | GPR158    |
| 10 | rs1050876<br>8 | T | G | 0.5625  | 0.1235  | 0.4167  | Non-genic |
| 10 | rs1050877<br>5 | A | G | 0.01562 | 0.3198  | 0.1053  | C10orf68  |
| 10 | rs1050881<br>2 | A | G | 0       | 0.5119  | 0.1053  | PARD3     |
| 10 | rs1050881<br>3 | C | T | 0.07812 | 0.5116  | 0.1842  | PARD3     |
| 10 | rs1050919<br>9 | A | C | 0       | 0.3663  | 0.1579  | Non-genic |
| 10 | rs1050923<br>6 | A | G | 0.5     | 0.1163  | 0.4167  | Non-genic |
| 10 | rs1050930<br>1 | C | T | 0       | 0.3193  | 0.07895 | RUFY2     |
| 10 | rs1050936<br>1 | G | A | 0.1094  | 0.561   | 0.2895  | C10orf11  |
| 10 | rs1050947<br>5 | T | C | 0.2969  | 0.6768  | 0.3529  | Non-genic |
| 10 | rs1050956<br>7 | A | G | 0.03125 | 0.3941  | 0.1944  | Non-genic |
| 10 | rs1050964<br>6 | C | T | 0.6719  | 0.2791  | 0.5     | Non-genic |
| 10 | rs1050973<br>2 | A | G | 0.04688 | 0.6412  | 0.3421  | Non-genic |
| 10 | rs1109609      | T | C | 0.3906  | 0.756   | 0.3158  | Non-genic |
| 10 | rs1122556      | G | A | 0.07812 | 0.4217  | 0.2105  | FAM178A   |
| 10 | rs1199098      | C | T | 0.2812  | 0.7035  | 0.3947  | Non-genic |
| 10 | rs1248994      | G | A | 0.125   | 0.6506  | 0.1944  | Non-genic |
| 10 | rs1325591      | A | G | 0       | 0.2744  | 0.02941 | Non-genic |
| 10 | rs1342273      | T | C | 0.5156  | 0.1118  | 0.3611  | MXI1      |
| 10 | rs1345107      | A | G | 0.3438  | 0.06471 | 0.2368  | ARHGAP22  |
| 10 | rs1387837      | G | A | 0.2031  | 0.7151  | 0.3421  | Non-genic |
| 10 | rs1408344      | A | C | 0.04688 | 0.3976  | 0.1053  | Non-genic |
| 10 | rs1431486      | T | G | 0.2656  | 0.02353 | 0.1944  | PNLIPRP3  |
| 10 | rs1473737      | C | T | 0.09375 | 0.4477  | 0.1842  | Non-genic |
| 10 | rs1561852      | C | A | 0.04688 | 0.5     | 0.1842  | Non-genic |
| 10 | rs1652713      | C | T | 0.4688  | 0.7035  | 0.3684  | Non-genic |
| 10 | rs1762002      | A | G | 0.1719  | 0.6279  | 0.1579  | Non-genic |
| 10 | rs1763895      | C | T | 0.3438  | 0.8125  | 0.5     | Non-genic |
| 10 | rs1774226      | A | G | 0.4688  | 0.6795  | 0.2778  | Non-genic |
| 10 | rs180647       | C | T | 0.2812  | 0.5926  | 0.3889  | Non-genic |
| 10 | rs1848797      | G | A | 0.01562 | 0.2824  | 0.07895 | Non-genic |
| 10 | rs1880066      | G | A | 0.2344  | 0.5523  | 0.3421  | Non-genic |
| 10 | rs1888665      | A | C | 0.07812 | 0.4882  | 0.2632  | Non-genic |
| 10 | rs1900493      | T | C | 0.2656  | 0.6039  | 0.375   | Non-genic |
| 10 | rs1909437      | G | A | 0.5781  | 0.2384  | 0.4474  | ADARB2    |
| 10 | rs1911323      | T | G | 0.2812  | 0.04762 | 0.1842  | CTNNA3    |



|    |           |   |   |         |         |         |           |
|----|-----------|---|---|---------|---------|---------|-----------|
| 10 | rs1914561 | C | T | 0.375   | 0.09494 | 0.2632  | Non-genic |
| 10 | rs1923658 | C | T | 0.1562  | 0.6919  | 0.4211  | Non-genic |
| 10 | rs1924715 | G | A | 0.01562 | 0.369   | 0.1579  | Non-genic |
| 10 | rs1929609 | T | C | 0.0625  | 0.6905  | 0.3158  | Non-genic |
| 10 | rs1941996 | T | G | 0.03125 | 0.216   | 0.02632 | CTNNA3    |
| 10 | rs2039709 | G | T | 0.2031  | 0.6341  | 0.3158  | Non-genic |
| 10 | rs2172407 | C | T | 0.04688 | 0.311   | 0.07895 | Non-genic |
| 10 | rs2209975 | C | T | 0.1719  | 0.475   | 0.2368  | Non-genic |
| 10 | rs2249295 | G | A | 0.6562  | 0.2     | 0.4444  | ATRNL1    |
| 10 | rs2250939 | T | C | 0.5     | 0.08333 | 0.3333  | Non-genic |
| 10 | rs2250942 | G | A | 0.5     | 0.04545 | 0.3611  | Non-genic |
| 10 | rs2252728 | T | G | 0.3125  | 0.06977 | 0.2368  | Non-genic |
| 10 | rs2255518 | G | A | 0.2969  | 0.75    | 0.4211  | Non-genic |
| 10 | rs2255936 | G | A | 0.2812  | 0.8072  | 0.5     | Non-genic |
| 10 | rs2351334 | C | A | 0.5     | 0.6412  | 0.4737  | Non-genic |
| 10 | rs2358839 | T | G | 0.1562  | 0.6024  | 0.3158  | PLXDC2    |
| 10 | rs2400107 | T | C | 0.1719  | 0.6353  | 0.3947  | Non-genic |
| 10 | rs2419577 | C | T | 0       | 0.3837  | 0.1842  | Non-genic |
| 10 | rs2605512 | G | A | 0.2969  | 0.7093  | 0.3421  | Non-genic |
| 10 | rs276214  | G | A | 0.5156  | 0.03488 | 0.3684  | ITPRIP    |
| 10 | rs2799573 | C | T | 0       | 0.3919  | 0.1875  | CACNB2    |
| 10 | rs2893721 | A | G | 0.1094  | 0.5602  | 0.2778  | Non-genic |
| 10 | rs2921923 | A | G | 0.2188  | 0.6899  | 0.3947  | PCDH15    |
| 10 | rs2947344 | A | G | 0.1875  | 0.7529  | 0.4474  | Non-genic |
| 10 | rs303502  | T | C | 0       | 0.1776  | 0.07895 | Non-genic |
| 10 | rs3763795 | C | A | 0       | 0.2284  | 0.02778 | C10orf81  |
| 10 | rs3844127 | C | A | 0.01562 | 0.4136  | 0.1667  | PARD3     |
| 10 | rs3844492 | A | G | 0.4531  | 0.7791  | 0.3421  | Non-genic |
| 10 | rs3862575 | T | C | 0.3281  | 0.04217 | 0.2368  | Non-genic |
| 10 | rs396186  | A | G | 0.2812  | 0.7849  | 0.3421  | Non-genic |
| 10 | rs4244961 | T | C | 0.09375 | 0.3663  | 0.1053  | Non-genic |
| 10 | rs4485050 | A | G | 0.1094  | 0.3554  | 0.07895 | Non-genic |
| 10 | rs582661  | T | C | 0.2188  | 0.6529  | 0.3947  | COL17A1   |
| 10 | rs596642  | T | C | 0.2031  | 0.6726  | 0.3947  | Non-genic |
| 10 | rs7071904 | C | T | 0.6094  | 0.2353  | 0.4737  | VPS26A    |
| 10 | rs7078153 | A | G | 0.1875  | 0.6395  | 0.3421  | DNMBP     |
| 10 | rs7090904 | G | T | 0.25    | 0.6131  | 0.3889  | Non-genic |
| 10 | rs7097617 | A | G | 0.04688 | 0.7118  | 0.3421  | Non-genic |
| 10 | rs7477048 | T | C | 0       | 0.1875  | 0.02632 | FAM190B   |
| 10 | rs755627  | A | G | 0.3281  | 0.7965  | 0.4737  | Non-genic |
| 10 | rs756308  | T | C | 0.3906  | 0.09302 | 0.3158  | Non-genic |
| 10 | rs7915322 | C | A | 0.375   | 0.07558 | 0.2368  | Non-genic |
| 10 | rs7917093 | A | G | 0.4062  | 0.09884 | 0.2895  | MXI1      |
| 10 | rs7920803 | C | T | 0.2031  | 0.5687  | 0.3611  | MPP7      |
| 10 | rs7922793 | C | T | 0.1094  | 0.3721  | 0.1053  | Non-genic |
| 10 | rs7924284 | C | T | 0.4062  | 0.8837  | 0.5     | CWF19L1   |
| 10 | rs868691  | T | C | 0.5469  | 0.1919  | 0.3889  | Non-genic |
| 10 | rs927099  | T | C | 0.09375 | 0.494   | 0.1579  | NRP1      |

|    |                |   |   |         |         |         |           |
|----|----------------|---|---|---------|---------|---------|-----------|
| 10 | rs927351       | G | A | 0.0625  | 0.2988  | 0.07895 | Non-genic |
| 10 | rs951753       | A | C | 0.5938  | 0.0814  | 0.3421  | Non-genic |
| 10 | rs952965       | A | G | 0.2031  | 0.5588  | 0.3684  | Non-genic |
| 10 | rs953093       | T | C | 0.4688  | 0.1603  | 0.4444  | Non-genic |
| 10 | rs959127       | A | G | 0.2031  | 0.8488  | 0.4474  | Non-genic |
| 10 | rs1049100<br>7 | G | A | 0.4844  | 0.1266  | 0.2632  | Non-genic |
| 10 | rs1049102<br>0 | A | G | 0.3125  | 0.0375  | 0.1316  | Non-genic |
| 10 | rs1050825<br>9 | A | C | 0.6875  | 0.2927  | 0.4211  | Non-genic |
| 10 | rs1050826<br>6 | T | G | 0.01562 | 0.3176  | 0.1842  | Non-genic |
| 10 | rs1050828<br>8 | G | A | 0.03125 | 0.3895  | 0.2632  | Non-genic |
| 10 | rs1050835<br>1 | G | A | 0.1406  | 0.5407  | 0.4474  | Non-genic |
| 10 | rs1050835<br>6 | T | C | 0.2188  | 0.5417  | 0.4211  | Non-genic |
| 10 | rs1050840<br>9 | T | C | 0.3438  | 0.04819 | 0.1053  | Non-genic |
| 10 | rs1050850<br>1 | A | G | 0.04688 | 0.3869  | 0.3824  | RSU1      |
| 10 | rs1050869<br>7 | T | G | 0.4844  | 0.1524  | 0.2368  | GPR158    |
| 10 | rs1050873<br>2 | A | G | 0.4375  | 0.05882 | 0.1842  | MPP7      |
| 10 | rs1050873<br>8 | C | T | 0.4688  | 0.1429  | 0.2941  | Non-genic |
| 10 | rs1050887<br>4 | C | T | 0.6406  | 0.2674  | 0.3947  | Non-genic |
| 10 | rs1050910<br>9 | C | T | 0.2344  | 0.7037  | 0.5     | Non-genic |
| 10 | rs1050928<br>4 | T | C | 0.6406  | 0.157   | 0.3684  | CTNNA3    |
| 10 | rs1050932<br>6 | G | A | 0.01562 | 0.4118  | 0.2368  | SGPL1     |
| 10 | rs1050938<br>2 | A | G | 0.9688  | 0.6458  | 0.4286  | KCNMA1    |
| 10 | rs1050940<br>1 | C | T | 0.01562 | 0.3547  | 0.3158  | Non-genic |
| 10 | rs1050942<br>0 | C | T | 0.5312  | 0.1325  | 0.07895 | Non-genic |
| 10 | rs1050950<br>7 | G | A | 0.04688 | 0.3976  | 0.25    | Non-genic |
| 10 | rs1050953<br>5 | G | A | 0.3906  | 0.1173  | 0.1389  | Non-genic |
| 10 | rs1050972<br>2 | C | T | 0.7344  | 0.1529  | 0.4211  | HPSE2     |
| 10 | rs1050976<br>7 | C | A | 0.07812 | 0.4464  | 0.2778  | Non-genic |
| 10 | rs1051003<br>8 | A | G | 0.07812 | 0.4167  | 0.3158  | Non-genic |
| 10 | rs1051005      | A | C | 0.125   | 0.5723  | 0.5     | Non-genic |

|    | 4              |   |   |         |         |         |           |
|----|----------------|---|---|---------|---------|---------|-----------|
| 10 | rs1051006<br>0 | A | G | 0       | 0.3086  | 0.1667  | Non-genic |
| 10 | rs1274135      | C | T | 0.4375  | 0.1279  | 0.1316  | Non-genic |
| 10 | rs1327002      | C | T | 0.2031  | 0.5789  | 0.4722  | FRMD4A    |
| 10 | rs1343709      | A | G | 0.7344  | 0.3438  | 0.4412  | KIAA1217  |
| 10 | rs1380316      | T | G | 0.5312  | 0.1824  | 0.2778  | Non-genic |
| 10 | rs1404786      | A | G | 0.04688 | 0.1118  | 0.1786  | SORCS3    |
| 10 | rs1408377      | T | C | 0.2969  | 0.05128 | 0.05556 | MINPP1    |
| 10 | rs1416560      | A | G | 0.125   | 0.461   | 0.4211  | Non-genic |
| 10 | rs1536389      | G | A | 0.1562  | 0.4302  | 0.3611  | PPAPDC1A  |
| 10 | rs1555732      | C | T | 0.07812 | 0.5647  | 0.4211  | Non-genic |
| 10 | rs161273       | A | C | 0.1129  | 0.8571  | 0.5     | ZEB1      |
| 10 | rs1926822      | T | C | 0.2031  | 0.5663  | 0.4211  | FRMD4A    |
| 10 | rs1933909      | C | A | 0       | 0.2791  | 0.1579  | Non-genic |
| 10 | rs1936614      | A | G | 0.5312  | 0.2059  | 0.3611  | Non-genic |
| 10 | rs1954342      | C | A | 0.6094  | 0.1471  | 0.3158  | Non-genic |
| 10 | rs1992529      | T | C | 0.07812 | 0.5181  | 0.3421  | Non-genic |
| 10 | rs1996316      | C | T | 0       | 0.3812  | 0.2632  | CUBN      |
| 10 | rs2209299      | A | G | 0.1719  | 0.5488  | 0.4167  | Non-genic |
| 10 | rs2281842      | G | T | 0.2188  | 0.7202  | 0.5     | GLRX3     |
| 10 | rs2344769      | T | C | 0.03125 | 0.3023  | 0.2368  | Non-genic |
| 10 | rs2399669      | T | C | 0.5938  | 0.125   | 0.2632  | CELF2     |
| 10 | rs2420970      | C | T | 0.9375  | 0.4765  | 0.4211  | ATE1      |
| 10 | rs2497351      | T | C | 0.3594  | 0.08537 | 0.1471  | Non-genic |
| 10 | rs2505740      | T | C | 0.5312  | 0.1529  | 0.2895  | Non-genic |
| 10 | rs2611050      | A | G | 0.8438  | 0.2202  | 0.4737  | Non-genic |
| 10 | rs2710767      | A | C | 0.03125 | 0.3077  | 0.2143  | Non-genic |
| 10 | rs2792695      | T | C | 0.8438  | 0.05814 | 0.3158  | Non-genic |
| 10 | rs2793299      | T | C | 0.2031  | 0.05814 | 0.05263 | Non-genic |
| 10 | rs2796832      | G | T | 0.5781  | 0.2093  | 0.2105  | CUBN      |
| 10 | rs286492       | T | C | 0.5625  | 0.2108  | 0.3611  | Non-genic |
| 10 | rs2887370      | A | G | 0.1406  | 0.5833  | 0.3684  | Non-genic |
| 10 | rs289265       | A | G | 0.2344  | 0.03488 | 0.02632 | KCNMA1    |
| 10 | rs2901587      | T | G | 0.1875  | 0.593   | 0.4444  | Non-genic |
| 10 | rs35648        | C | T | 0.6562  | 0.1941  | 0.2105  | Non-genic |
| 10 | rs3851569      | G | A | 0.5938  | 0.2093  | 0.3421  | Non-genic |
| 10 | rs4509682      | G | A | 0.1562  | 0.5291  | 0.4474  | C10orf72  |
| 10 | rs4576712      | C | T | 0.5938  | 0.2284  | 0.3684  | Non-genic |
| 10 | rs4622198      | T | G | 0.4844  | 0.1688  | 0.3235  | KCNMA1    |
| 10 | rs4747790      | C | T | 0.7344  | 0.3198  | 0.4737  | Non-genic |
| 10 | rs4919234      | T | G | 0.4688  | 0.125   | 0.2368  | HPSE2     |
| 10 | rs4934372      | T | C | 0.7969  | 0.2849  | 0.5     | SH2D4B    |
| 10 | rs5029676      | A | G | 0.7344  | 0.4177  | 0.3824  | Non-genic |
| 10 | rs535182       | T | C | 0.3594  | 0.04762 | 0.1842  | HPSE2     |
| 10 | rs6482124      | C | T | 0.2969  | 0.6768  | 0.5     | SLC39A12  |
| 10 | rs668498       | G | A | 0.09375 | 0.5116  | 0.3684  | FBXO18    |
| 10 | rs7083417      | C | A | 0.5938  | 0.1118  | 0.3158  | Non-genic |
| 10 | rs716838       | C | T | 0.7969  | 0.3092  | 0.4211  | HPSE2     |

|    |                |   |   |         |         |         |           |
|----|----------------|---|---|---------|---------|---------|-----------|
| 10 | rs723483       | T | C | 0.1875  | 0.5698  | 0.4474  | Non-genic |
| 10 | rs726786       | T | G | 0.1719  | 0.564   | 0.3684  | Non-genic |
| 10 | rs727532       | G | A | 0.2344  | 0.02469 | 0.08333 | ABLIM1    |
| 10 | rs7475965      | C | T | 0.7344  | 0.1646  | 0.4167  | Non-genic |
| 10 | rs764114       | G | T | 0.09375 | 0.3837  | 0.2632  | Non-genic |
| 10 | rs7894473      | A | G | 0.5312  | 0.1686  | 0.3158  | Non-genic |
| 10 | rs7896883      | T | C | 0.01562 | 0.5952  | 0.3158  | SLIT3     |
| 10 | rs7919814      | T | C | 0.2031  | 0.756   | 0.5     | Non-genic |
| 10 | rs867764       | G | A | 0       | 0.2824  | 0.2632  | CAMK1D    |
| 10 | rs912477       | G | A | 0.4531  | 0.1221  | 0.1842  | Non-genic |
| 10 | rs947599       | G | A | 0.3281  | 0.6221  | 0.5     | CEP55     |
| 10 | rs955245       | G | A | 0.4219  | 0.05814 | 0.2368  | Non-genic |
| 10 | rs956368       | G | A | 0.625   | 0.1882  | 0.2105  | Non-genic |
| 10 | rs965934       | A | G | 0.8438  | 0.2188  | 0.4211  | HPSE2     |
| 11 | rs662702       | T | C | 0.375   | 0.07831 | 0.2105  | PAX6      |
| 11 | rs1050167<br>3 | T | G | 0.2812  | 0.05488 | 0.2188  | GRM5      |
| 11 | rs1050224<br>3 | A | G | 0.5625  | 0.05882 | 0.4211  | GRIK4     |
| 11 | rs2850303      | G | A | 0.04688 | 0.4884  | 0.2368  | NCAM1     |
| 11 | rs308793       | A | C | 0.3281  | 0.5325  | 0.2895  | GRM5      |
| 11 | rs949295       | T | C | 0.1094  | 0.6747  | 0.3684  | GRIK4     |
| 11 | rs1050215<br>0 | C | T | 0.03125 | 0.3895  | 0.2105  | ALG9      |
| 11 | rs1050215<br>1 | T | C | 0.03125 | 0.3895  | 0.2105  | ALG9      |
| 11 | rs1050059<br>0 | C | T | 0.01562 | 0.4471  | 0.1842  | STIM1     |
| 11 | rs2920137      | C | T | 0.7031  | 0.1047  | 0.4474  | STIM1     |
| 11 | rs63934        | G | A | 0.01562 | 0.25    | 0.07895 | KCNQ1     |
| 11 | rs1013377      | T | G | 0.2969  | 0.625   | 0.4412  | Non-genic |
| 11 | rs1020580      | T | C | 0.4062  | 0.7346  | 0.3947  | LRRC4C    |
| 11 | rs1037161      | T | C | 0.1094  | 0.4353  | 0.1579  | Non-genic |
| 11 | rs1037412      | G | A | 0.4219  | 0.8537  | 0.3889  | LRRC4C    |
| 11 | rs1048876<br>8 | T | C | 0.1875  | 0.5732  | 0.3158  | ARHGAP20  |
| 11 | rs1050068<br>3 | C | T | 0.125   | 0.5294  | 0.2632  | Non-genic |
| 11 | rs1050070<br>3 | A | G | 0.04688 | 0.3529  | 0.1053  | STK33     |
| 11 | rs1050093<br>2 | A | G | 0.5     | 0.1647  | 0.3947  | Non-genic |
| 11 | rs1050093<br>7 | T | C | 0.1094  | 0.6386  | 0.2105  | Non-genic |
| 11 | rs1050096<br>2 | G | A | 0.09375 | 0.4217  | 0.1667  | Non-genic |
| 11 | rs1050105<br>8 | A | C | 0.1562  | 0.6205  | 0.2368  | ANO3      |
| 11 | rs1050114<br>4 | C | T | 0.2656  | 0.6205  | 0.3684  | LDLRAD3   |
| 11 | rs1050118<br>4 | A | G | 0.03125 | 0.4529  | 0.1053  | Non-genic |

|    |            |   |   |         |         |         |           |
|----|------------|---|---|---------|---------|---------|-----------|
| 11 | rs10501204 | G | A | 0.07812 | 0.5813  | 0.2368  | Non-genic |
| 11 | rs10501206 | A | G | 0.2656  | 0.09884 | 0.4474  | Non-genic |
| 11 | rs10501230 | G | A | 0.0625  | 0.3588  | 0.1579  | Non-genic |
| 11 | rs10501246 | C | T | 0.25    | 0.6294  | 0.3947  | Non-genic |
| 11 | rs10501472 | A | G | 0.03125 | 0.3373  | 0.1842  | Non-genic |
| 11 | rs10501539 | T | C | 0.125   | 0.512   | 0.2895  | Non-genic |
| 11 | rs10501756 | G | A | 0.03125 | 0.3133  | 0.1316  | Non-genic |
| 11 | rs10501851 | A | G | 0.6719  | 0.8605  | 0.5     | MAML2     |
| 11 | rs10501933 | C | T | 0.07812 | 0.3176  | 0.1786  | CNTN5     |
| 11 | rs10502172 | T | C | 0       | 0.3118  | 0.07895 | TTC12     |
| 11 | rs10502207 | T | C | 0       | 0.4244  | 0.1842  | Non-genic |
| 11 | rs10502234 | A | G | 0.1406  | 0.4302  | 0.1842  | Non-genic |
| 11 | rs10750999 | G | A | 0       | 0.3547  | 0.1316  | ATL3      |
| 11 | rs1079785  | C | T | 0.25    | 0.657   | 0.3684  | Non-genic |
| 11 | rs1108539  | C | A | 0.1562  | 0.5407  | 0.1316  | Non-genic |
| 11 | rs1116327  | C | T | 0.01562 | 0.5123  | 0.2632  | Non-genic |
| 11 | rs1237999  | G | A | 0.125   | 0.4882  | 0.2895  | Non-genic |
| 11 | rs1351650  | A | G | 0.01562 | 0.525   | 0.1316  | Non-genic |
| 11 | rs1385165  | G | A | 0.625   | 0.1429  | 0.4474  | Non-genic |
| 11 | rs1386450  | A | G | 0.2188  | 0.6446  | 0.2895  | NAV2      |
| 11 | rs1397048  | C | T | 0.1875  | 0.7262  | 0.4474  | OR9G9     |
| 11 | rs1397050  | C | T | 0.2031  | 0.6     | 0.2632  | Non-genic |
| 11 | rs1400549  | T | C | 0       | 0.3253  | 0.08824 | Non-genic |
| 11 | rs1509605  | T | G | 0.125   | 0.4337  | 0.1053  | LUZP2     |
| 11 | rs1519414  | C | A | 0.0625  | 0.4244  | 0.1579  | Non-genic |
| 11 | rs1573567  | C | T | 0.3906  | 0.1     | 0.2895  | Non-genic |
| 11 | rs1648364  | C | T | 0.5938  | 0.1325  | 0.3889  | Non-genic |
| 11 | rs1789742  | C | A | 0.375   | 0.09302 | 0.2895  | Non-genic |
| 11 | rs1789842  | G | A | 0.1875  | 0.7326  | 0.4211  | Non-genic |
| 11 | rs1837822  | C | T | 0.3594  | 0.02532 | 0.2895  | Non-genic |
| 11 | rs1940033  | C | T | 0.6094  | 0.2469  | 0.5     | NTM       |
| 11 | rs1944683  | T | C | 0.1094  | 0.7294  | 0.3421  | Non-genic |
| 11 | rs1945222  | A | G | 0.1094  | 0.5588  | 0.2632  | Non-genic |
| 11 | rs2028570  | A | G | 0.1562  | 0.7317  | 0.3158  | NAV2      |
| 11 | rs2056247  | A | C | 0.4375  | 0.7952  | 0.4474  | Non-genic |
| 11 | rs2127062  | T | C | 0       | 0.4118  | 0.1579  | LGR4      |
| 11 | rs2155177  | C | A | 0.1406  | 0.05814 | 0.3421  | Non-genic |
| 11 | rs2186584  | T | G | 0.03125 | 0.3253  | 0.1471  | MAML2     |

|    |           |   |   |         |         |         |           |
|----|-----------|---|---|---------|---------|---------|-----------|
| 11 | rs2249178 | G | A | 0.0625  | 0.4012  | 0.1389  | NAV2      |
| 11 | rs2305282 | C | T | 0.3281  | 0.06471 | 0.2368  | SLC35F2   |
| 11 | rs2370794 | A | G | 0.5156  | 0.7706  | 0.5     | CRTAM     |
| 11 | rs2468782 | G | T | 0.4844  | 0.08537 | 0.3684  | Non-genic |
| 11 | rs2593685 | C | T | 0.04688 | 0.4167  | 0.1316  | SLC17A6   |
| 11 | rs2666895 | T | G | 0.4844  | 0.09524 | 0.3421  | Non-genic |
| 11 | rs2716454 | A | G | 0.2656  | 0.8397  | 0.4737  | LUZP2     |
| 11 | rs2847476 | A | G | 0.2188  | 0.5353  | 0.2895  | Non-genic |
| 11 | rs2863131 | A | C | 0.01562 | 0.5     | 0.1842  | TSPAN18   |
| 11 | rs2863161 | C | A | 0.3281  | 0.119   | 0.3684  | PRDM11    |
| 11 | rs2871610 | A | G | 0.2188  | 0.5814  | 0.3421  | Non-genic |
| 11 | rs294335  | C | T | 0.03125 | 0.3614  | 0.07895 | Non-genic |
| 11 | rs2957509 | C | T | 0.3125  | 0.09302 | 0.2895  | NAT10     |
| 11 | rs3782093 | A | G | 0.01562 | 0.3647  | 0.1842  | POLA2     |
| 11 | rs3867247 | G | A | 0.3438  | 0.6386  | 0.3158  | Non-genic |
| 11 | rs3901231 | T | G | 0.01562 | 0.2805  | 0.1053  | Non-genic |
| 11 | rs4121863 | A | G | 0.2344  | 0.6312  | 0.3824  | Non-genic |
| 11 | rs4128590 | C | T | 0.2031  | 0.01744 | 0.2105  | Non-genic |
| 11 | rs4132801 | C | T | 0.2969  | 0.7169  | 0.3684  | Non-genic |
| 11 | rs4378393 | G | A | 0.2969  | 0.7933  | 0.1667  | Non-genic |
| 11 | rs4450153 | A | G | 0.4688  | 0.1     | 0.2895  | Non-genic |
| 11 | rs4506607 | A | G | 0.6719  | 0.189   | 0.4444  | FAT3      |
| 11 | rs477961  | T | C | 0.2188  | 0.5756  | 0.3158  | STT3A     |
| 11 | rs481554  | A | G | 0.1406  | 0.5556  | 0.3421  | Non-genic |
| 11 | rs4930346 | G | A | 0.09375 | 0.4765  | 0.1579  | PACS1     |
| 11 | rs4938377 | G | T | 0.01562 | 0.1395  | 0.02632 | Non-genic |
| 11 | rs507015  | T | C | 0.3906  | 0.7671  | 0.5     | Non-genic |
| 11 | rs582740  | T | G | 0.25    | 0.5867  | 0.3529  | Non-genic |
| 11 | rs587677  | T | C | 0.4844  | 0.1037  | 0.3421  | Non-genic |
| 11 | rs598829  | T | G | 0.09375 | 0.3882  | 0.1842  | NTM       |
| 11 | rs6592881 | A | G | 0.3281  | 0.7256  | 0.4444  | Non-genic |
| 11 | rs677909  | C | T | 0.0625  | 0.4048  | 0.2105  | PICALM    |
| 11 | rs680511  | G | A | 0.03125 | 0.4012  | 0.1842  | TECTA     |
| 11 | rs704617  | A | G | 0.04688 | 0.6012  | 0.1842  | Non-genic |
| 11 | rs7114092 | G | A | 0.1562  | 0.4824  | 0.2222  | C11orf41  |
| 11 | rs7121835 | G | A | 0.7188  | 0.9634  | 0.5     | Non-genic |
| 11 | rs7125624 | T | C | 0.2656  | 0.8118  | 0.3947  | LRRC4C    |
| 11 | rs7128824 | C | A | 0.1406  | 0.6919  | 0.3947  | Non-genic |
| 11 | rs717211  | A | G | 0.03125 | 0.4294  | 0.1111  | Non-genic |
| 11 | rs720459  | C | T | 0.2812  | 0.6279  | 0.3684  | Non-genic |
| 11 | rs7932437 | C | T | 0.2031  | 0.6047  | 0.3158  | NRXN2     |
| 11 | rs7933522 | T | C | 0.2656  | 0.8415  | 0.3684  | LRRC4C    |
| 11 | rs7937934 | T | C | 0.125   | 0.75    | 0.3684  | Non-genic |
| 11 | rs7939844 | G | A | 0.2344  | 0.5724  | 0.3421  | Non-genic |
| 11 | rs7946770 | A | C | 0.4531  | 0.8235  | 0.3947  | CNTN5     |
| 11 | rs7946787 | C | A | 0       | 0.3837  | 0.07895 | Non-genic |
| 11 | rs7947221 | T | G | 0.5625  | 0.1341  | 0.3947  | Non-genic |
| 11 | rs7947920 | C | T | 0.1719  | 0.506   | 0.2105  | Non-genic |

|    |                |   |   |         |         |        |           |
|----|----------------|---|---|---------|---------|--------|-----------|
| 11 | rs836124       | T | G | 0.375   | 0.6919  | 0.2632 | Non-genic |
| 11 | rs836135       | A | G | 0.4062  | 0.03488 | 0.3421 | Non-genic |
| 11 | rs9299979      | G | A | 0.6719  | 0.8314  | 0.4474 | Non-genic |
| 11 | rs948360       | T | C | 0.6875  | 0.07738 | 0.4737 | BRMS1     |
| 11 | rs951932       | G | A | 0.5625  | 0.25    | 0.4474 | Non-genic |
| 11 | rs958846       | C | T | 0.3065  | 0.7256  | 0.3056 | Non-genic |
| 11 | rs965467       | C | T | 0.04688 | 0.3895  | 0.1316 | TMEM135   |
| 11 | rs966536       | C | A | 0.1875  | 0.6548  | 0.3158 | Non-genic |
| 11 | rs999004       | T | C | 0.4062  | 0.7469  | 0.3947 | LRRC4C    |
| 11 | rs1011641      | C | T | 0.5781  | 0.02907 | 0.2895 | Non-genic |
| 11 | rs1050062<br>2 | G | A | 0       | 0.3987  | 0.2353 | Non-genic |
| 11 | rs1050096<br>8 | C | T | 0       | 0.2278  | 0.1389 | Non-genic |
| 11 | rs1050106<br>9 | C | T | 0.07812 | 0.4688  | 0.4444 | Non-genic |
| 11 | rs1050129<br>8 | C | T | 0.5938  | 0.1429  | 0.3    | TTC17     |
| 11 | rs1050145<br>4 | T | C | 0.75    | 0.3155  | 0.4474 | Non-genic |
| 11 | rs1050150<br>3 | C | T | 0.1875  | 0.5783  | 0.4167 | Non-genic |
| 11 | rs1050173<br>8 | T | C | 0.07812 | 0.3861  | 0.2778 | Non-genic |
| 11 | rs1050202<br>0 | A | G | 0.07812 | 0.4878  | 0.3056 | Non-genic |
| 11 | rs1113480      | A | C | 0.01562 | 0.8     | 0.4211 | PTPRJ     |
| 11 | rs120435       | T | C | 0.09375 | 0.4494  | 0.4167 | Non-genic |
| 11 | rs120436       | G | A | 0.09375 | 0.5789  | 0.3929 | Non-genic |
| 11 | rs1219391      | A | G | 0.5469  | 0.1512  | 0.2368 | Non-genic |
| 11 | rs1381782      | T | C | 0.07812 | 0.4062  | 0.2895 | Non-genic |
| 11 | rs1391619      | G | A | 0.4844  | 0.1337  | 0.2105 | Non-genic |
| 11 | rs1487214      | C | T | 0.8438  | 0.1279  | 0.4737 | NAV2      |
| 11 | rs1496222      | C | T | 0.03125 | 0.4625  | 0.3158 | Non-genic |
| 11 | rs1533224      | C | A | 0.01562 | 0.3313  | 0.2353 | Non-genic |
| 11 | rs1584184      | A | G | 0.5469  | 0.125   | 0.3333 | Non-genic |
| 11 | rs1943381      | G | A | 0.625   | 0.2593  | 0.3158 | CHORDC1   |
| 11 | rs1944685      | A | G | 0.5312  | 0.25    | 0.3421 | Non-genic |
| 11 | rs1944771      | G | A | 0.4375  | 0.1203  | 0.2632 | Non-genic |
| 11 | rs1945085      | G | A | 0.03125 | 0.4226  | 0.3421 | Non-genic |
| 11 | rs2105806      | C | T | 0.7344  | 0.275   | 0.4167 | DLG2      |
| 11 | rs2162341      | A | G | 0.7344  | 0.3608  | 0.4286 | Non-genic |
| 11 | rs2174880      | G | A | 0.125   | 0.5291  | 0.4737 | Non-genic |
| 11 | rs2508358      | T | C | 0.625   | 0.253   | 0.4167 | Non-genic |
| 11 | rs317148       | T | C | 0.09375 | 0.5357  | 0.3684 | NOX4      |
| 11 | rs3740873      | T | G | 0.09375 | 0.5241  | 0.3947 | SLC6A5    |
| 11 | rs3847544      | A | G | 0.25    | 0.6353  | 0.4474 | FAT3      |
| 11 | rs4132365      | C | T | 0.5625  | 0.2143  | 0.2    | Non-genic |
| 11 | rs4394833      | C | A | 0.125   | 0.5353  | 0.4211 | Non-genic |
| 11 | rs4418789      | T | G | 0.2031  | 0.6824  | 0.5    | PARVA     |

|    |                |   |   |         |         |         |           |
|----|----------------|---|---|---------|---------|---------|-----------|
| 11 | rs4536170      | C | T | 0.5781  | 0.128   | 0.3529  | Non-genic |
| 11 | rs4755142      | G | A | 0.9375  | 0.2911  | 0.4688  | Non-genic |
| 11 | rs490592       | A | C | 0.2812  | 0.06548 | 0.125   | Non-genic |
| 11 | rs566797       | T | C | 0.7344  | 0.3706  | 0.3421  | Non-genic |
| 11 | rs567236       | A | G | 0.4531  | 0.1176  | 0.1667  | Non-genic |
| 11 | rs589449       | A | G | 0.8281  | 0.2     | 0.4737  | FAT3      |
| 11 | rs594808       | G | A | 0.375   | 0.0875  | 0.1875  | CNTN5     |
| 11 | rs614179       | A | G | 0.7344  | 0.3041  | 0.3824  | Non-genic |
| 11 | rs615248       | C | T | 0.4688  | 0.03488 | 0.2368  | Non-genic |
| 11 | rs624605       | G | T | 0.1719  | 0.4882  | 0.4167  | UVRAG     |
| 11 | rs633761       | T | G | 0.09375 | 0.5     | 0.3947  | Non-genic |
| 11 | rs673731       | A | G | 0.6719  | 0.3882  | 0.5     | XRRA1     |
| 11 | rs7111266      | C | T | 0.6562  | 0.1131  | 0.2368  | Non-genic |
| 11 | rs7117365      | A | G | 0.5     | 0.09524 | 0.1667  | Non-genic |
| 11 | rs7119888      | C | A | 0.7812  | 0.2791  | 0.4737  | BBOX1     |
| 11 | rs7121784      | A | C | 0.6094  | 0.186   | 0.3684  | POU2F3    |
| 11 | rs724787       | A | C | 0.6719  | 0.2384  | 0.3947  | Non-genic |
| 11 | rs763302       | T | G | 0.8281  | 0.4321  | 0.4737  | Non-genic |
| 11 | rs7939598      | A | G | 0.2344  | 0.6279  | 0.4474  | FAT3      |
| 11 | rs899036       | G | T | 0.6452  | 0.157   | 0.3889  | Non-genic |
| 11 | rs923031       | A | C | 0.07812 | 0.4877  | 0.3333  | Non-genic |
| 11 | rs949161       | C | T | 0.6875  | 0.2529  | 0.3684  | Non-genic |
| 11 | rs956471       | A | G | 0.125   | 0.4186  | 0.3158  | Non-genic |
| 11 | rs980804       | T | C | 0.2656  | 0.6512  | 0.4737  | Non-genic |
| 12 | rs2100996      | G | A | 0.01562 | 0.5437  | 0.2632  | SLCO1B1   |
| 12 | rs1044825      | T | G | 0.09375 | 0.4529  | 0.2632  | CACNA2D4  |
| 12 | rs1049196<br>7 | A | G | 0.375   | 0.1098  | 0.3684  | TSPAN9    |
| 12 | rs1049199<br>0 | A | G | 0       | 0.3118  | 0.1316  | ETV6      |
| 12 | rs1049200<br>2 | T | C | 0.01562 | 0.3133  | 0.1053  | ACSS3     |
| 12 | rs1049224<br>8 | T | C | 0.1094  | 0.7765  | 0.3947  | Non-genic |
| 12 | rs1049238<br>5 | C | A | 0.1875  | 0.5176  | 0.2105  | Non-genic |
| 12 | rs1050575<br>1 | G | A | 0.0625  | 0.4     | 0.1579  | CLEC9A    |
| 12 | rs1050583<br>4 | T | C | 0.0625  | 0.6588  | 0.3158  | Non-genic |
| 12 | rs1050587<br>0 | A | G | 0.07812 | 0.4419  | 0.1579  | Non-genic |
| 12 | rs1050587<br>9 | T | G | 0.2031  | 0.619   | 0.1842  | KIAA0528  |
| 12 | rs1050617<br>7 | C | T | 0.0625  | 0.3824  | 0.1842  | CNTN1     |
| 12 | rs1050621<br>0 | T | C | 0       | 0.2765  | 0.07895 | Non-genic |
| 12 | rs1050631<br>5 | C | T | 0.625   | 0.131   | 0.4737  | EIF4B     |
| 12 | rs1050634      | G | A | 0.4062  | 0.04118 | 0.2368  | Non-genic |



|    |                |   |   |         |         |         |           |
|----|----------------|---|---|---------|---------|---------|-----------|
|    | 8              |   |   |         |         |         |           |
| 12 | rs1050682<br>4 | C | T | 0.09375 | 0.5118  | 0.2105  | OTOGL     |
| 12 | rs1050689<br>1 | A | C | 0.4375  | 0.1329  | 0.3571  | Non-genic |
| 12 | rs1050713<br>2 | T | C | 0.4531  | 0.1235  | 0.3158  | MYBPC1    |
| 12 | rs1050717<br>2 | A | G | 0.2031  | 0       | 0.1579  | HSP90B1   |
| 12 | rs1117561<br>7 | T | G | 0       | 0.2105  | 0.0625  | Non-genic |
| 12 | rs1159869      | A | G | 0.07812 | 0.7706  | 0.2895  | LRR1Q1    |
| 12 | rs1195569      | G | A | 0.4375  | 0.7907  | 0.4737  | Non-genic |
| 12 | rs1355469      | G | A | 0.3281  | 0.09412 | 0.3947  | Non-genic |
| 12 | rs1374527      | T | C | 0.3438  | 0.7209  | 0.5     | Non-genic |
| 12 | rs1386037      | T | C | 0.01562 | 0.2824  | 0.05263 | Non-genic |
| 12 | rs1397605      | A | G | 0.4062  | 0.08333 | 0.2895  | Non-genic |
| 12 | rs1398442      | T | G | 0.03125 | 0.625   | 0.2353  | Non-genic |
| 12 | rs1405467      | G | A | 0.07812 | 0.8562  | 0.3824  | Non-genic |
| 12 | rs1424612      | T | C | 0.5469  | 0.1118  | 0.4474  | Non-genic |
| 12 | rs1444629      | G | A | 0.4688  | 0.75    | 0.5     | PDE3A     |
| 12 | rs1444630      | A | G | 0.5312  | 0.2134  | 0.4474  | PDE3A     |
| 12 | rs1451098      | A | G | 0.07812 | 0.6163  | 0.3421  | OTOGL     |
| 12 | rs1526810      | A | G | 0.2031  | 0.0122  | 0.1842  | Non-genic |
| 12 | rs1526832      | C | T | 0.4844  | 0.06707 | 0.3     | Non-genic |
| 12 | rs1549102      | C | A | 0.125   | 0.5235  | 0.2632  | ANKS1B    |
| 12 | rs1554486      | C | T | 0.0625  | 0.3882  | 0.1316  | Non-genic |
| 12 | rs1582881      | A | G | 0.125   | 0.4942  | 0.2368  | STAB2     |
| 12 | rs1731545      | T | C | 0.1719  | 0.686   | 0.3684  | Non-genic |
| 12 | rs1825478      | C | T | 0.1667  | 0.7531  | 0.3158  | ITPR2     |
| 12 | rs1877882      | A | G | 0.0625  | 0.3133  | 0.1053  | Non-genic |
| 12 | rs1878420      | C | T | 0.3125  | 0.7471  | 0.3889  | KSR2      |
| 12 | rs1894984      | T | C | 0.2656  | 0.6706  | 0.3684  | Non-genic |
| 12 | rs1905444      | A | G | 0.04688 | 0.4012  | 0.1389  | Non-genic |
| 12 | rs1921045      | A | G | 0.3281  | 0.6173  | 0.2895  | PPFIA2    |
| 12 | rs2058429      | T | C | 0.8594  | 0.0814  | 0.5     | KLRB1     |
| 12 | rs2075397      | G | A | 0       | 0.2927  | 0.02778 | Non-genic |
| 12 | rs2099368      | A | G | 0.04688 | 0.4824  | 0.2632  | Non-genic |
| 12 | rs2141859      | A | C | 0.2188  | 0.5233  | 0.3056  | CHST11    |
| 12 | rs2169989      | T | C | 0.2656  | 0.7013  | 0.3824  | Non-genic |
| 12 | rs2191964      | A | G | 0.4375  | 0.05814 | 0.4211  | Non-genic |
| 12 | rs225563       | A | G | 0.125   | 0.4345  | 0.2632  | Non-genic |
| 12 | rs2369942      | G | A | 0.2344  | 0.6163  | 0.4211  | Non-genic |
| 12 | rs2371978      | T | C | 0.4688  | 0.186   | 0.3684  | Non-genic |
| 12 | rs2373358      | G | A | 0.01562 | 0.3036  | 0.05263 | Non-genic |
| 12 | rs2377800      | C | T | 0.5     | 0.1118  | 0.3684  | Non-genic |
| 12 | rs2450994      | A | G | 0.125   | 0.3855  | 0.1579  | H1FNT     |
| 12 | rs2551390      | G | A | 0.07812 | 0.3721  | 0.1316  | Non-genic |
| 12 | rs2712498      | T | C | 0.09375 | 0.5063  | 0.2895  | Non-genic |
| 12 | rs2712668      | C | T | 0.6875  | 0.175   | 0.4688  | ANKS1B    |

|    |                |   |   |         |         |         |           |
|----|----------------|---|---|---------|---------|---------|-----------|
| 12 | rs312270       | C | T | 0.07812 | 0.3779  | 0.1579  | CNTN1     |
| 12 | rs324021       | C | A | 0.04688 | 0.3519  | 0.07895 | MYO1A     |
| 12 | rs337678       | A | C | 0.07812 | 0.7024  | 0.3889  | Non-genic |
| 12 | rs3871520      | A | G | 0.09375 | 0.5174  | 0.2895  | BICD1     |
| 12 | rs3911720      | T | C | 0.03125 | 0.1265  | 0.02632 | Non-genic |
| 12 | rs4129599      | C | T | 0.5625  | 0.157   | 0.4737  | NTN4      |
| 12 | rs4130296      | A | C | 0.5156  | 0.1221  | 0.3947  | FBXW8     |
| 12 | rs4131751      | A | G | 0.09375 | 0.4765  | 0.1316  | Non-genic |
| 12 | rs4237965      | A | G | 0.4844  | 0.08333 | 0.2895  | Non-genic |
| 12 | rs4763904      | A | G | 0.03125 | 0.2849  | 0.05263 | GPRC5D    |
| 12 | rs4767066      | T | C | 0.03125 | 0.3314  | 0.1316  | SLC24A6   |
| 12 | rs4963579      | C | T | 0.2031  | 0.7267  | 0.4474  | Non-genic |
| 12 | rs4963867      | T | C | 0.2188  | 0.5941  | 0.3158  | Non-genic |
| 12 | rs637074       | T | C | 0.0625  | 0.4277  | 0.1389  | Non-genic |
| 12 | rs6488067      | G | A | 0.2656  | 0.6105  | 0.1389  | FGD4      |
| 12 | rs6488068      | A | G | 0.3281  | 0.6221  | 0.1842  | FGD4      |
| 12 | rs6538998      | C | T | 0.2812  | 0.6707  | 0.2941  | MYBPC1    |
| 12 | rs708881       | G | A | 0.4219  | 0.7     | 0.3889  | CCDC60    |
| 12 | rs7134792      | T | C | 0.03125 | 0.407   | 0.1842  | Non-genic |
| 12 | rs7135493      | T | G | 0.1406  | 0.3333  | 0.2188  | Non-genic |
| 12 | rs7135621      | T | C | 0.375   | 0.5     | 0.2353  | Non-genic |
| 12 | rs7135655      | A | G | 0.4375  | 0.1529  | 0.4737  | LOH12CR1  |
| 12 | rs724201       | G | A | 0.09375 | 0.4286  | 0.2368  | LGR5      |
| 12 | rs726206       | A | G | 0.1094  | 0.5357  | 0.2368  | Non-genic |
| 12 | rs726603       | C | A | 0.25    | 0.6471  | 0.4474  | Non-genic |
| 12 | rs727233       | G | A | 0       | 0.343   | 0.1316  | Non-genic |
| 12 | rs7312834      | C | T | 0.4375  | 0.1084  | 0.2895  | Non-genic |
| 12 | rs7313618      | T | G | 0.5156  | 0.1163  | 0.3421  | GOLT1B    |
| 12 | rs748548       | A | G | 0.07812 | 0.4593  | 0.2632  | TMEM132B  |
| 12 | rs751448       | T | C | 0.09375 | 0.4059  | 0.1579  | NT5DC3    |
| 12 | rs773652       | G | A | 0.5469  | 0.02907 | 0.3947  | CS        |
| 12 | rs7965628      | G | A | 0.0625  | 0.5361  | 0.1842  | Non-genic |
| 12 | rs7975586      | T | C | 0.4688  | 0.2256  | 0.4444  | Non-genic |
| 12 | rs9142         | G | A | 0.2812  | 0.7059  | 0.3421  | NT5DC3    |
| 12 | rs9300166      | C | T | 0.1719  | 0.04762 | 0.3421  | Non-genic |
| 12 | rs9325191      | A | C | 0.0625  | 0.3642  | 0.2105  | Non-genic |
| 12 | rs952394       | C | T | 0.2344  | 0.5833  | 0.25    | Non-genic |
| 12 | rs952464       | T | C | 0.4375  | 0.7857  | 0.5     | Non-genic |
| 12 | rs966864       | G | A | 0.4688  | 0.8452  | 0.5     | SLCO1C1   |
| 12 | rs983459       | G | T | 0.4688  | 0.05882 | 0.3421  | Non-genic |
| 12 | rs1049216<br>4 | T | C | 0.5781  | 0.1047  | 0.3158  | CLEC2D    |
| 12 | rs1049229<br>1 | G | A | 0.9375  | 0.3198  | 0.4211  | Non-genic |
| 12 | rs1049233<br>7 | A | G | 0       | 0.1118  | 0.1389  | Non-genic |
| 12 | rs1049234<br>7 | T | C | 0.4219  | 0.1059  | 0.1579  | Non-genic |
| 12 | rs1050575<br>2 | A | G | 0.6719  | 0.2035  | 0.3684  | C12orf59  |

|    |                |   |   |         |         |         |           |
|----|----------------|---|---|---------|---------|---------|-----------|
| 12 | rs1050599<br>9 | G | T | 0.4531  | 0.1358  | 0.2105  | ITPR2     |
| 12 | rs1050633<br>7 | C | T | 0.3594  | 0.03529 | 0.1579  | Non-genic |
| 12 | rs1050645<br>1 | G | A | 0.1406  | 0.5882  | 0.4167  | PPM1H     |
| 12 | rs1050656<br>8 | C | T | 0.09375 | 0.5536  | 0.4737  | Non-genic |
| 12 | rs1050660<br>6 | C | A | 0.6094  | 0.2683  | 0.2895  | PTPRR     |
| 12 | rs1050660<br>9 | C | T | 0.75    | 0.3353  | 0.3947  | PTPRR     |
| 12 | rs1050663<br>2 | C | T | 0.4844  | 0.09639 | 0.1579  | LGR5      |
| 12 | rs1050686<br>4 | G | A | 0.7031  | 0.1205  | 0.3684  | Non-genic |
| 12 | rs1050695<br>9 | T | C | 0.4688  | 0.1118  | 0.2632  | Non-genic |
| 12 | rs1050707<br>0 | A | G | 0       | 0.02941 | 0.1842  | AMDHD1    |
| 12 | rs1050719<br>1 | C | T | 0.875   | 0.4647  | 0.4737  | Non-genic |
| 12 | rs1093310      | C | A | 0.5469  | 0.1919  | 0.3056  | KSR2      |
| 12 | rs1144418      | T | G | 0.01562 | 0.2901  | 0.3158  | Non-genic |
| 12 | rs1165596      | C | T | 0.0625  | 0.4012  | 0.2368  | Non-genic |
| 12 | rs1240290      | A | G | 0.2812  | 0.04118 | 0.1579  | Non-genic |
| 12 | rs1388681      | G | A | 0.25    | 0.6     | 0.4474  | Non-genic |
| 12 | rs1391707      | A | C | 0.5781  | 0.1627  | 0.2632  | Non-genic |
| 12 | rs1492948      | A | G | 0.5938  | 0.1951  | 0.2368  | Non-genic |
| 12 | rs1566889      | G | A | 0       | 0.5119  | 0.3056  | KSR2      |
| 12 | rs1604955      | G | A | 0.2031  | 0.5882  | 0.4737  | EEA1      |
| 12 | rs1682593      | A | G | 0.6562  | 0.2235  | 0.3158  | TMTC2     |
| 12 | rs1722402      | G | A | 0       | 0.5494  | 0.3889  | Non-genic |
| 12 | rs1731459      | C | T | 0.7656  | 0.1977  | 0.4737  | TMEM117   |
| 12 | rs1797987      | C | T | 0.4219  | 0.1024  | 0.2368  | Non-genic |
| 12 | rs1828384      | C | T | 0.04688 | 0.3929  | 0.3158  | Non-genic |
| 12 | rs1877115      | A | G | 0.4844  | 0.1941  | 0.2368  | Non-genic |
| 12 | rs2192190      | G | T | 0.8906  | 0.4051  | 0.4737  | ANO2      |
| 12 | rs2194829      | A | G | 0.1094  | 0.07738 | 0.05263 | Non-genic |
| 12 | rs2343866      | T | C | 0.01562 | 0.3059  | 0.1842  | Non-genic |
| 12 | rs2370413      | T | C | 0.03125 | 0.3869  | 0.3158  | CACNA1C   |
| 12 | rs310846       | T | C | 0.5781  | 0.2099  | 0.2895  | Non-genic |
| 12 | rs310850       | G | A | 0.75    | 0.3631  | 0.3684  | Non-genic |
| 12 | rs35426        | G | A | 0       | 0.3235  | 0.2778  | Non-genic |
| 12 | rs3847938      | C | T | 0.4375  | 0.1203  | 0.1471  | TMEM132B  |
| 12 | rs3849229      | A | C | 0.5781  | 0.2169  | 0.1667  | Non-genic |
| 12 | rs3901661      | G | A | 0       | 0.4038  | 0.2059  | Non-genic |
| 12 | rs4034627      | A | G | 0.5469  | 0.05952 | 0.2632  | Non-genic |
| 12 | rs4119057      | A | G | 0.03125 | 0.436   | 0.2632  | Non-genic |
| 12 | rs4131955      | G | A | 0.04688 | 0.6845  | 0.3684  | Non-genic |
| 12 | rs4143188      | A | C | 0.375   | 0.09756 | 0.1667  | C12orf26  |

|    |                |   |   |         |         |         |           |
|----|----------------|---|---|---------|---------|---------|-----------|
| 12 | rs4760469      | C | T | 0.7344  | 0.3176  | 0.4706  | Non-genic |
| 12 | rs4762559      | G | A | 0.7188  | 0.4826  | 0.4737  | ANKS1B    |
| 12 | rs4763780      | G | T | 0.6875  | 0.2791  | 0.3684  | BCL2L14   |
| 12 | rs505071       | A | G | 0.5625  | 0.2209  | 0.3421  | PPM1H     |
| 12 | rs606443       | C | A | 0.03125 | 0.375   | 0.25    | DYNLL1    |
| 12 | rs703592       | T | G | 0.375   | 0.04938 | 0.07895 | Non-genic |
| 12 | rs706824       | G | A | 0.6094  | 0.2791  | 0.2632  | Non-genic |
| 12 | rs725957       | A | G | 0.1406  | 0.4881  | 0.3158  | Non-genic |
| 12 | rs7316231      | A | G | 0.6875  | 0.2952  | 0.4737  | Non-genic |
| 12 | rs735390       | G | A | 0.4219  | 0.06173 | 0.2059  | Non-genic |
| 12 | rs7953647      | T | C | 0.375   | 0.07229 | 0.1579  | RERG      |
| 12 | rs7969455      | T | C | 0.5625  | 0.179   | 0.3421  | DPPA3     |
| 12 | rs7978742      | G | A | 0.4375  | 0.09884 | 0.1842  | Non-genic |
| 12 | rs826759       | C | T | 0.3594  | 0.06471 | 0.1111  | Non-genic |
| 12 | rs888550       | T | C | 0.5781  | 0.1294  | 0.3158  | ISCU      |
| 12 | rs888551       | G | A | 0.5781  | 0.1235  | 0.3158  | ISCU      |
| 12 | rs958812       | A | G | 0       | 0.2229  | 0.1842  | ETV6      |
| 12 | rs959275       | C | T | 0.5469  | 0.1646  | 0.1944  | Non-genic |
| 13 | rs2391191      | A | G | 0.03125 | 0.4464  | 0.2895  | DAOA      |
| 13 | rs687045       | C | A | 0.01562 | 0.3457  | 0.1579  | KL        |
| 13 | rs1571786      | G | A | 0.1719  | 0.5588  | 0.3158  | SLC7A1    |
| 13 | rs4771911      | C | T | 0.5469  | 0.1412  | 0.3611  | ABCC4     |
| 13 | rs1049244<br>9 | G | T | 0       | 0.2353  | 0.05263 | LCP1      |
| 13 | rs1049245<br>5 | G | A | 0.09375 | 0.4302  | 0.1579  | EFHA1     |
| 13 | rs1049245<br>6 | C | T | 0.375   | 0.686   | 0.4474  | Non-genic |
| 13 | rs1049251<br>9 | G | A | 0       | 0.2798  | 0.07895 | FAM124A   |
| 13 | rs1049262<br>5 | A | G | 0.4062  | 0.09375 | 0.3235  | Non-genic |
| 13 | rs1050740<br>8 | G | A | 0.3594  | 0.04118 | 0.2632  | Non-genic |
| 13 | rs1050741<br>6 | T | G | 0.2031  | 0.5926  | 0.3947  | Non-genic |
| 13 | rs1050755<br>9 | G | A | 0       | 0.3438  | 0.1053  | Non-genic |
| 13 | rs1050759<br>3 | A | G | 0.1094  | 0.4706  | 0.2105  | Non-genic |
| 13 | rs1050766<br>8 | T | G | 0.6406  | 0.1047  | 0.4211  | Non-genic |
| 13 | rs1050791<br>4 | A | G | 0.4375  | 0.08235 | 0.2632  | Non-genic |
| 13 | rs1051140<br>2 | T | C | 0.03125 | 0.506   | 0.2368  | Non-genic |
| 13 | rs1170994      | T | C | 0.5469  | 0.1941  | 0.4722  | DCLK1     |
| 13 | rs1323154      | T | C | 0.1719  | 0.5291  | 0.2105  | ENOX1     |
| 13 | rs1326481      | T | C | 0.07812 | 0.8176  | 0.3611  | Non-genic |
| 13 | rs1359634      | C | T | 0.2188  | 0.5941  | 0.3421  | Non-genic |
| 13 | rs1409379      | C | T | 0.5312  | 0.1802  | 0.4211  | B3GALTL   |

|    |           |   |   |         |         |         |           |
|----|-----------|---|---|---------|---------|---------|-----------|
| 13 | rs1409437 | G | A | 0.125   | 0.5     | 0.1579  | LCP1      |
| 13 | rs1412483 | A | G | 0.3594  | 0.7965  | 0.2632  | Non-genic |
| 13 | rs1446776 | C | T | 0.09375 | 0.6279  | 0.3421  | Non-genic |
| 13 | rs1449571 | A | G | 0.1875  | 0.8412  | 0.4722  | Non-genic |
| 13 | rs1536212 | T | G | 0.1406  | 0.4353  | 0.1579  | COG3      |
| 13 | rs1550669 | C | T | 0.6094  | 0.1105  | 0.3947  | Non-genic |
| 13 | rs1894756 | A | G | 0.01562 | 0.2558  | 0.02632 | Non-genic |
| 13 | rs1931914 | C | T | 0.4062  | 0.686   | 0.3947  | Non-genic |
| 13 | rs1937388 | T | C | 0.4062  | 0.09884 | 0.3158  | Non-genic |
| 13 | rs1986785 | C | A | 0.1406  | 0.5756  | 0.3158  | MTUS2     |
| 13 | rs1998676 | C | T | 0.4844  | 0.07059 | 0.4211  | Non-genic |
| 13 | rs1999603 | A | G | 0.5     | 0.075   | 0.3947  | Non-genic |
| 13 | rs2065390 | T | G | 0       | 0.314   | 0.05263 | Non-genic |
| 13 | rs2116412 | A | G | 0.3906  | 0.8     | 0.4737  | Non-genic |
| 13 | rs2147552 | G | A | 0.6094  | 0.08974 | 0.3947  | Non-genic |
| 13 | rs2148065 | T | C | 0.4375  | 0.06395 | 0.2895  | Non-genic |
| 13 | rs2149769 | C | T | 0.25    | 0.5988  | 0.3421  | IFT88     |
| 13 | rs2151037 | G | A | 0.4516  | 0.7622  | 0.3421  | Non-genic |
| 13 | rs2389530 | G | A | 0       | 0.2654  | 0.1111  | UGGT2     |
| 13 | rs2876817 | A | C | 0.1406  | 0.8618  | 0.3667  | Non-genic |
| 13 | rs3900236 | T | C | 0.09375 | 0.3605  | 0.07895 | Non-genic |
| 13 | rs3945431 | G | A | 0.1094  | 0.4128  | 0.1053  | KIAA0564  |
| 13 | rs4123443 | C | T | 0.0625  | 0.3395  | 0.05263 | GPC6      |
| 13 | rs4128764 | G | A | 0.07812 | 0.2733  | 0.1579  | Non-genic |
| 13 | rs4242932 | G | T | 0.2344  | 0.7588  | 0.3684  | Non-genic |
| 13 | rs4482174 | T | C | 0.6562  | 0.75    | 0.3889  | Non-genic |
| 13 | rs4886250 | T | C | 0.3281  | 0.7267  | 0.4211  | Non-genic |
| 13 | rs4886367 | T | C | 0.4375  | 0.7622  | 0.4688  | Non-genic |
| 13 | rs4941520 | A | G | 0.3125  | 0.6529  | 0.2895  | Non-genic |
| 13 | rs546400  | C | T | 0.0625  | 0.5679  | 0.2105  | FGF14     |
| 13 | rs54939   | G | T | 0.5625  | 0.2353  | 0.4722  | Non-genic |
| 13 | rs6491307 | A | G | 0.5312  | 0.128   | 0.3947  | HS6ST3    |
| 13 | rs6562686 | T | C | 0.5938  | 0.09524 | 0.3684  | Non-genic |
| 13 | rs658520  | G | A | 0.3438  | 0.9012  | 0.5     | Non-genic |
| 13 | rs696788  | C | T | 0.5625  | 0.2108  | 0.4474  | Non-genic |
| 13 | rs717091  | G | A | 0.25    | 0.6486  | 0.2667  | Non-genic |
| 13 | rs725040  | C | T | 0.1094  | 0.5542  | 0.1944  | GPC5      |
| 13 | rs726298  | G | A | 0.04688 | 0.5349  | 0.2368  | Non-genic |
| 13 | rs729270  | G | A | 0.2031  | 0.6627  | 0.3056  | Non-genic |
| 13 | rs7317767 | T | C | 0.1562  | 0.7321  | 0.3889  | Non-genic |
| 13 | rs7319370 | A | G | 0.2656  | 0.7439  | 0.5     | Non-genic |
| 13 | rs7320723 | G | A | 0.4531  | 0.7595  | 0.5     | MBNL2     |
| 13 | rs7325541 | G | A | 0.2344  | 0.5802  | 0.3158  | Non-genic |
| 13 | rs7326471 | C | T | 0.4844  | 0.1512  | 0.3421  | C13orf15  |
| 13 | rs7328733 | C | A | 0.5     | 0.08721 | 0.3158  | Non-genic |
| 13 | rs7334131 | C | T | 0.3906  | 0.1235  | 0.3158  | Non-genic |
| 13 | rs7338552 | A | G | 0.4062  | 0.075   | 0.2778  | Non-genic |
| 13 | rs797502  | A | C | 0.5625  | 0.02907 | 0.3158  | Non-genic |

|    |                |   |   |         |         |         |           |
|----|----------------|---|---|---------|---------|---------|-----------|
| 13 | rs7992190      | A | G | 0.1719  | 0.6919  | 0.4211  | Non-genic |
| 13 | rs7992923      | G | A | 0.25    | 0.6049  | 0.3333  | Non-genic |
| 13 | rs7998252      | T | C | 0.5     | 0.1802  | 0.3947  | Non-genic |
| 13 | rs8001194      | C | A | 0.2969  | 0.6607  | 0.3421  | Non-genic |
| 13 | rs817737       | T | C | 0.5781  | 0.2284  | 0.4737  | Non-genic |
| 13 | rs831223       | C | T | 0.1094  | 0.9235  | 0.4474  | Non-genic |
| 13 | rs9284233      | T | C | 0.125   | 0.6824  | 0.3421  | Non-genic |
| 13 | rs9285137      | G | A | 0.1875  | 0.7024  | 0.3684  | Non-genic |
| 13 | rs9300766      | C | T | 0.3125  | 0.6845  | 0.3947  | Non-genic |
| 13 | rs9300791      | T | C | 0.03125 | 0.3929  | 0.1053  | Non-genic |
| 13 | rs9300943      | G | A | 0.125   | 0.4709  | 0.1842  | Non-genic |
| 13 | rs9301082      | C | T | 0.2969  | 0.7412  | 0.4474  | Non-genic |
| 13 | rs9301301      | T | C | 0.3438  | 0.08235 | 0.2368  | Non-genic |
| 13 | rs9315777      | C | A | 0.07812 | 0.4535  | 0.2632  | Non-genic |
| 13 | rs9315991      | A | C | 0.4062  | 0.1369  | 0.3947  | Non-genic |
| 13 | rs9316103      | C | T | 0.3906  | 0.06977 | 0.3158  | Non-genic |
| 13 | rs9316160      | T | C | 0       | 0.3081  | 0.1053  | Non-genic |
| 13 | rs9316596      | A | G | 0.4375  | 0.06471 | 0.3056  | Non-genic |
| 13 | rs9316967      | T | G | 0.09375 | 0.4464  | 0.1579  | Non-genic |
| 13 | rs9317008      | A | C | 0       | 0.4706  | 0.2105  | Non-genic |
| 13 | rs9318318      | A | G | 0       | 0.2785  | 0.1053  | Non-genic |
| 13 | rs9318387      | A | C | 0.125   | 0.5432  | 0.2368  | SPATA13   |
| 13 | rs9319046      | T | C | 0.25    | 0.05233 | 0.2778  | Non-genic |
| 13 | rs9324315      | A | G | 0.4062  | 0.07229 | 0.3158  | Non-genic |
| 13 | rs951538       | T | C | 0.125   | 0.5291  | 0.3158  | Non-genic |
| 13 | rs952766       | A | G | 0.1774  | 0.6353  | 0.3947  | Non-genic |
| 13 | rs983634       | C | T | 0.2031  | 0.506   | 0.2059  | Non-genic |
| 13 | rs1049268<br>0 | G | A | 0.07812 | 0.4762  | 0.3684  | Non-genic |
| 13 | rs1050763<br>2 | C | T | 0.375   | 0.08235 | 0.1053  | Non-genic |
| 13 | rs1050799<br>2 | T | C | 0.0625  | 0.3735  | 0.3421  | GPC5      |
| 13 | rs1151379      | A | G | 0.5312  | 0.1375  | 0.2895  | NALCN     |
| 13 | rs1172416      | C | T | 0.3438  | 0.08667 | 0.05556 | Non-genic |
| 13 | rs1323619      | A | C | 0.125   | 0.5     | 0.3158  | Non-genic |
| 13 | rs1325466      | G | T | 0.7188  | 0.1706  | 0.3947  | TBC1D4    |
| 13 | rs1380888      | C | T | 0.7344  | 0.1647  | 0.2368  | Non-genic |
| 13 | rs1391044      | G | A | 0.7188  | 0.3506  | 0.4474  | Non-genic |
| 13 | rs1411646      | G | A | 0.07812 | 0.488   | 0.3056  | Non-genic |
| 13 | rs1502061      | C | T | 0.5625  | 0.1667  | 0.3438  | Non-genic |
| 13 | rs1504418      | G | A | 0       | 0.2808  | 0.1765  | Non-genic |
| 13 | rs1556225      | C | A | 0.3125  | 0.05882 | 0.1842  | Non-genic |
| 13 | rs1570613      | C | T | 0.6094  | 0.08824 | 0.2632  | Non-genic |
| 13 | rs1571316      | T | C | 0.7969  | 0.3631  | 0.3158  | Non-genic |
| 13 | rs1572086      | G | A | 0.7812  | 0.3519  | 0.4737  | Non-genic |
| 13 | rs1764423      | A | G | 0.5     | 0.1829  | 0.1944  | Non-genic |
| 13 | rs188014       | T | C | 0.3125  | 0.1     | 0.1316  | Non-genic |
| 13 | rs1886191      | C | T | 0.6562  | 0.08235 | 0.2778  | Non-genic |

|    |           |   |   |         |         |         |           |
|----|-----------|---|---|---------|---------|---------|-----------|
| 13 | rs2000363 | G | A | 0.01562 | 0.1726  | 0.1053  | Non-genic |
| 13 | rs2039095 | C | T | 0.6875  | 0.5309  | 0.4412  | Non-genic |
| 13 | rs206321  | C | A | 0       | 0.3488  | 0.1842  | N4BP2L1   |
| 13 | rs2148418 | T | C | 0.1719  | 0.6706  | 0.4474  | Non-genic |
| 13 | rs2323476 | A | G | 0.1875  | 0.5256  | 0.3611  | Non-genic |
| 13 | rs2325065 | T | C | 0.6406  | 0.2798  | 0.4474  | Non-genic |
| 13 | rs2351871 | A | G | 0.0625  | 0.5952  | 0.3611  | GPC5      |
| 13 | rs2352028 | T | C | 0.625   | 0.1928  | 0.2778  | GPC5      |
| 13 | rs2352029 | C | A | 0.625   | 0.1726  | 0.2895  | GPC5      |
| 13 | rs298788  | C | T | 0.1875  | 0.5141  | 0.4286  | Non-genic |
| 13 | rs2991444 | C | T | 0.2812  | 0.03049 | 0.05263 | Non-genic |
| 13 | rs2992022 | T | C | 0.0625  | 0.4107  | 0.4211  | Non-genic |
| 13 | rs3117915 | G | A | 0.7742  | 0.2294  | 0.3889  | Non-genic |
| 13 | rs3622    | G | A | 0.25    | 0.04651 | 0.02632 | FAM123A   |
| 13 | rs369655  | C | T | 0.625   | 0.1686  | 0.3947  | Non-genic |
| 13 | rs3847994 | C | T | 0.1719  | 0.6395  | 0.4211  | Non-genic |
| 13 | rs3899559 | T | C | 0.1562  | 0.538   | 0.3611  | Non-genic |
| 13 | rs3916934 | T | C | 0.1719  | 0.5915  | 0.3947  | Non-genic |
| 13 | rs3918345 | A | G | 0.1719  | 0.6964  | 0.4444  | Non-genic |
| 13 | rs4286009 | A | C | 0.5625  | 0.1133  | 0.2778  | Non-genic |
| 13 | rs4772292 | G | A | 0.4062  | 0.05233 | 0.1053  | PCCA      |
| 13 | rs493925  | T | G | 0.0625  | 0.7024  | 0.4211  | Non-genic |
| 13 | rs521416  | T | C | 0.5469  | 0.1118  | 0.2368  | Non-genic |
| 13 | rs542610  | C | T | 0.6719  | 0.2384  | 0.3947  | POLR1D    |
| 13 | rs610695  | G | A | 0       | 0.2562  | 0.2632  | Non-genic |
| 13 | rs7318474 | G | A | 0.7656  | 0.3415  | 0.3947  | Non-genic |
| 13 | rs7324330 | C | T | 0.5938  | 0.2651  | 0.4211  | PCDH9     |
| 13 | rs7325688 | T | C | 0.625   | 0.1313  | 0.3158  | HS6ST3    |
| 13 | rs7327287 | C | T | 0.375   | 0.08929 | 0.1316  | Non-genic |
| 13 | rs7329978 | G | A | 0.3438  | 0.05422 | 0.1316  | Non-genic |
| 13 | rs7998347 | C | T | 0.6875  | 0.2412  | 0.4474  | USP12     |
| 13 | rs863712  | G | A | 0       | 0.2791  | 0.1842  | Non-genic |
| 13 | rs873342  | C | A | 0.4688  | 0.06627 | 0.1579  | CDK8      |
| 13 | rs895898  | G | T | 0.1094  | 0.6628  | 0.3947  | Non-genic |
| 13 | rs9300635 | T | C | 0.2969  | 0.08721 | 0       | Non-genic |
| 13 | rs9300636 | C | T | 0.7812  | 0.2975  | 0.4118  | Non-genic |
| 13 | rs9318048 | T | C | 0.7344  | 0.3171  | 0.4737  | Non-genic |
| 13 | rs9318302 | T | C | 0.04688 | 0.3721  | 0.2105  | Non-genic |
| 13 | rs9318666 | G | A | 0.5625  | 0.119   | 0.2632  | Non-genic |
| 13 | rs9318729 | T | C | 0.2031  | 0.6012  | 0.4722  | Non-genic |
| 13 | rs9319159 | T | C | 0.04688 | 0.4679  | 0.3158  | Non-genic |
| 13 | rs9319164 | T | C | 0.4375  | 0.1221  | 0.2105  | Non-genic |
| 13 | rs951520  | T | C | 0       | 0.4096  | 0.2812  | Non-genic |
| 13 | rs984300  | A | G | 0.1094  | 0.5471  | 0.3947  | MYO16     |
| 14 | rs1952586 | C | T | 0.3906  | 0.131   | 0.3056  | ESR2      |
| 14 | rs179250  | A | G | 0.375   | 0.05357 | 0.2105  | TSHR      |
| 14 | rs1049863 |   |   |         |         |         |           |
| 14 | 9         | G | A | 0.7031  | 0.3198  | 0.4211  | SERPINA6  |
| 14 | rs1016692 | G | A | 0.01562 | 0.4535  | 0.1053  | GALNTL1   |

|    |                |   |   |         |         |         |           |
|----|----------------|---|---|---------|---------|---------|-----------|
| 14 | rs1033823      | C | T | 0.5     | 0.06627 | 0.3947  | Non-genic |
| 14 | rs1036979      | T | G | 0.4688  | 0.1294  | 0.3056  | Non-genic |
| 14 | rs1048327<br>1 | A | G | 0.4062  | 0.1084  | 0.3158  | Non-genic |
| 14 | rs1048329<br>5 | C | T | 0       | 0.1791  | 0.03571 | Non-genic |
| 14 | rs1048334<br>5 | G | A | 0.2188  | 0.6118  | 0.2895  | Non-genic |
| 14 | rs1048336<br>7 | A | G | 0.0625  | 0.4136  | 0.07895 | Non-genic |
| 14 | rs1048344<br>7 | C | T | 0.7812  | 0.1341  | 0.4722  | NPAS3     |
| 14 | rs1048346<br>4 | C | A | 0.4219  | 0.7143  | 0.2895  | Non-genic |
| 14 | rs1048356<br>5 | T | C | 0.01562 | 0.5536  | 0.2368  | MDGA2     |
| 14 | rs1048362<br>1 | G | A | 0.625   | 0.05882 | 0.3684  | Non-genic |
| 14 | rs1048362<br>7 | G | A | 0.2969  | 0.7342  | 0.4167  | Non-genic |
| 14 | rs1048364<br>2 | A | G | 0.03125 | 0.5291  | 0.2632  | Non-genic |
| 14 | rs1048368<br>2 | T | C | 0.4531  | 0.1084  | 0.3235  | Non-genic |
| 14 | rs1048380<br>7 | G | A | 0.0625  | 0.6628  | 0.3158  | RAD51L1   |
| 14 | rs1048417<br>7 | T | G | 0.3906  | 0.6707  | 0.3158  | Non-genic |
| 14 | rs1048418<br>3 | T | C | 0       | 0.1914  | 0.02632 | Non-genic |
| 14 | rs1048420<br>1 | G | A | 0.1094  | 0.3941  | 0.2105  | Non-genic |
| 14 | rs1049832<br>6 | A | C | 0.0625  | 0.4702  | 0.1579  | Non-genic |
| 14 | rs1049836<br>5 | A | G | 0.03125 | 0.4277  | 0.2105  | Non-genic |
| 14 | rs1049840<br>4 | G | A | 0.1562  | 0.6084  | 0.2059  | Non-genic |
| 14 | rs1049843<br>1 | C | T | 0.3125  | 0.7     | 0.4118  | FRMD6     |
| 14 | rs1049843<br>8 | C | T | 0.4688  | 0.09412 | 0.4474  | GNG2      |
| 14 | rs1049847<br>3 | G | A | 0.1875  | 0.01765 | 0.2632  | Non-genic |
| 14 | rs1049857<br>3 | G | T | 0.375   | 0.7407  | 0.4211  | Non-genic |
| 14 | rs1049864<br>7 | T | C | 0.3906  | 0.05882 | 0.2368  | Non-genic |
| 14 | rs1112330      | C | A | 0.2969  | 0.7917  | 0.5     | Non-genic |
| 14 | rs1112573      | T | G | 0       | 0.3704  | 0.0625  | Non-genic |
| 14 | rs1122708      | C | T | 0       | 0.1184  | 0.02941 | SLC8A3    |
| 14 | rs1257282      | A | G | 0.3594  | 0.1071  | 0.3947  | Non-genic |
| 14 | rs1341001      | A | G | 0.1562  | 0.6529  | 0.3421  | Non-genic |
| 14 | rs1451928      | C | A | 0.04688 | 0.3988  | 0.1111  | Non-genic |



|    |           |   |   |         |         |         |           |
|----|-----------|---|---|---------|---------|---------|-----------|
| 14 | rs1466407 | A | C | 0.2344  | 0.6686  | 0.4474  | Non-genic |
| 14 | rs1473706 | A | G | 0.03125 | 0.2927  | 0.02778 | FLRT2     |
| 14 | rs1521165 | C | T | 0.04688 | 0.4634  | 0.1389  | Non-genic |
| 14 | rs178458  | G | T | 0.2812  | 0.6506  | 0.2368  | Non-genic |
| 14 | rs1951349 | T | C | 0.129   | 0.5407  | 0.2632  | Non-genic |
| 14 | rs1951614 | T | C | 0.07812 | 0.4419  | 0.1842  | GTF2A1    |
| 14 | rs1952512 | A | G | 0.3125  | 0.08824 | 0.3947  | ZNF219    |
| 14 | rs1958180 | G | A | 0       | 0.3438  | 0.1     | DAAM1     |
| 14 | rs1998777 | G | A | 0.6875  | 0.1402  | 0.4474  | Non-genic |
| 14 | rs2010281 | A | G | 0       | 0.3471  | 0.1667  | MARK3     |
| 14 | rs2022694 | T | C | 0.08333 | 0.5132  | 0.1875  | Non-genic |
| 14 | rs2057130 | C | A | 0.1406  | 0.4826  | 0.2368  | ZBTB25    |
| 14 | rs2080087 | A | G | 0       | 0.3605  | 0.1053  | DLST      |
| 14 | rs214011  | A | G | 0.5625  | 0.1899  | 0.4706  | Non-genic |
| 14 | rs2194530 | A | G | 0.04688 | 0.6131  | 0.3158  | NRXN3     |
| 14 | rs221492  | G | A | 0.2656  | 0.7791  | 0.3947  | NRXN3     |
| 14 | rs2244414 | C | T | 0.3281  | 0.5595  | 0.2105  | Non-genic |
| 14 | rs2300844 | G | A | 0.07812 | 0.6369  | 0.3056  | AKAP6     |
| 14 | rs2331706 | T | C | 0.07812 | 0.5765  | 0.2895  | RAD51L1   |
| 14 | rs2400352 | A | G | 0.4062  | 0.09877 | 0.3333  | Non-genic |
| 14 | rs2400968 | T | C | 0.2188  | 0.5882  | 0.3684  | Non-genic |
| 14 | rs2415438 | A | G | 0.1406  | 0.439   | 0.2368  | Non-genic |
| 14 | rs2816809 | G | A | 0.2812  | 0.6346  | 0.3529  | Non-genic |
| 14 | rs2899875 | T | C | 0.1406  | 0.4562  | 0.1842  | Non-genic |
| 14 | rs373655  | A | G | 0.1875  | 0.3953  | 0.2105  | FOXN3     |
| 14 | rs394499  | G | A | 0.3125  | 0.6471  | 0.3158  | FOXN3     |
| 14 | rs408462  | T | C | 0.1094  | 0.5595  | 0.2368  | Non-genic |
| 14 | rs4556706 | A | G | 0.625   | 0.1562  | 0.4737  | NPAS3     |
| 14 | rs4898828 | C | T | 0.3281  | 0.7215  | 0.4444  | Non-genic |
| 14 | rs4903750 | A | C | 0.6094  | 0.2313  | 0.4722  | Non-genic |
| 14 | rs6571820 | G | A | 0.2969  | 0.6163  | 0.25    | Non-genic |
| 14 | rs6573161 | C | T | 0.2969  | 0.02976 | 0.2632  | Non-genic |
| 14 | rs709857  | T | C | 0.01562 | 0.5176  | 0.2368  | Non-genic |
| 14 | rs7143933 | T | G | 0       | 0.3269  | 0.06667 | Non-genic |
| 14 | rs717059  | G | A | 0.4844  | 0.1429  | 0.3684  | KCNH5     |
| 14 | rs718362  | C | T | 0.6875  | 0.1588  | 0.4412  | RHOJ      |
| 14 | rs723204  | G | A | 0.1875  | 0.6296  | 0.2812  | Non-genic |
| 14 | rs763913  | G | A | 0.5781  | 0.2468  | 0.4722  | Non-genic |
| 14 | rs765899  | T | C | 0.0625  | 0.5671  | 0.2105  | RAD51L1   |
| 14 | rs8004126 | G | A | 0.3594  | 0.8855  | 0.3421  | Non-genic |
| 14 | rs8004280 | A | G | 0.09375 | 0.5465  | 0.3158  | Non-genic |
| 14 | rs8006358 | A | G | 0.5625  | 0.2152  | 0.4444  | Non-genic |
| 14 | rs8007174 | G | A | 0.09375 | 0.5118  | 0.1842  | Non-genic |
| 14 | rs8008452 | A | G | 0.09375 | 0.4588  | 0.1111  | Non-genic |
| 14 | rs9323178 | A | G | 0.1094  | 0.5119  | 0.2895  | Non-genic |
| 14 | rs9323416 | A | G | 0.03226 | 0.4     | 0.07895 | Non-genic |
| 14 | rs9323533 | G | A | 0.07812 | 0.4767  | 0.1842  | Non-genic |
| 14 | rs9323567 | T | C | 0.4531  | 0.09639 | 0.3158  | RGS6      |

|    |                |   |   |         |         |        |           |
|----|----------------|---|---|---------|---------|--------|-----------|
| 14 | rs9323994      | A | C | 0.5781  | 0.8418  | 0.5    | Non-genic |
| 14 | rs935334       | T | C | 0.4219  | 0.1118  | 0.3684 | Non-genic |
| 14 | rs943154       | C | A | 0.3438  | 0.02941 | 0.2368 | Non-genic |
| 14 | rs1048358<br>7 | A | G | 0.6562  | 0.1941  | 0.3421 | Non-genic |
| 14 | rs1048383<br>1 | T | C | 0       | 0.3476  | 0.2632 | MED6      |
| 14 | rs1048394<br>9 | C | T | 0.8125  | 0.314   | 0.4211 | Non-genic |
| 14 | rs1048399<br>5 | C | A | 0.03125 | 0.3274  | 0.1842 | KCNK10    |
| 14 | rs1048400<br>1 | C | T | 0.6875  | 0.2791  | 0.3684 | Non-genic |
| 14 | rs1048422<br>3 | C | T | 0       | 0.2     | 0.2188 | OR4K13    |
| 14 | rs1057737      | A | G | 0.5781  | 0.1235  | 0.2895 | NAA30     |
| 14 | rs1255329      | T | C | 0.3281  | 0.05422 | 0.1875 | Non-genic |
| 14 | rs1257424      | T | G | 0       | 0.3605  | 0.2895 | BCL11B    |
| 14 | rs1483973      | T | C | 0.03125 | 0.4767  | 0.2632 | Non-genic |
| 14 | rs1885186      | T | C | 0.6406  | 0.2791  | 0.3684 | Non-genic |
| 14 | rs1951004      | C | T | 0.01562 | 0.5549  | 0.3438 | Non-genic |
| 14 | rs1953433      | A | G | 0.3594  | 0.08824 | 0.1842 | NPAS3     |
| 14 | rs1954149      | T | C | 0.03125 | 0.6867  | 0.4737 | Non-genic |
| 14 | rs1956904      | C | T | 0.5312  | 0.1012  | 0.2368 | KHNYN     |
| 14 | rs1959991      | T | C | 0.01562 | 0.4     | 0.2368 | Non-genic |
| 14 | rs1983747      | A | C | 0       | 0.2303  | 0.2188 | Non-genic |
| 14 | rs2022773      | T | C | 0.5     | 0.131   | 0.2778 | Non-genic |
| 14 | rs2101551      | T | C | 0.125   | 0.5353  | 0.3684 | KCNH5     |
| 14 | rs2249106      | G | A | 0.5625  | 0.1905  | 0.3684 | Non-genic |
| 14 | rs2332909      | T | C | 0.7812  | 0.3412  | 0.3158 | DPF3      |
| 14 | rs2352921      | C | T | 0.01562 | 0.3171  | 0.3125 | Non-genic |
| 14 | rs2357344      | G | A | 0.6875  | 0.2471  | 0.4474 | SYNE2     |
| 14 | rs2383481      | A | G | 0.6719  | 0.2407  | 0.4167 | NPAS3     |
| 14 | rs243224       | C | A | 0.7812  | 0.3554  | 0.4737 | FOXN3     |
| 14 | rs36409        | T | C | 0.6406  | 0.1529  | 0.3056 | Non-genic |
| 14 | rs3783759      | A | G | 0.7188  | 0.3314  | 0.5    | PRKCH     |
| 14 | rs3809         | T | C | 0.5312  | 0.09639 | 0.2222 | SDR39U1   |
| 14 | rs4325487      | C | A | 0.5312  | 0.1294  | 0.2632 | FLRT2     |
| 14 | rs712374       | C | T | 0.4844  | 0.1392  | 0.2647 | SLC25A21  |
| 14 | rs7146384      | A | G | 0.6094  | 0.2073  | 0.3421 | Non-genic |
| 14 | rs7149815      | A | G | 0.2188  | 0.02976 | 0      | Non-genic |
| 14 | rs7155872      | C | T | 0.6562  | 0.1706  | 0.3158 | Non-genic |
| 14 | rs721910       | A | C | 0.7812  | 0.2035  | 0.4474 | Non-genic |
| 14 | rs722462       | A | C | 0.5781  | 0.1279  | 0.3421 | Non-genic |
| 14 | rs724023       | C | T | 0.7031  | 0.1824  | 0.3611 | Non-genic |
| 14 | rs725693       | G | T | 0.8281  | 0.3421  | 0.4333 | NRXN3     |
| 14 | rs8015306      | G | A | 0.7344  | 0.2765  | 0.3684 | Non-genic |
| 14 | rs8015423      | T | C | 0.1406  | 0.4345  | 0.3158 | Non-genic |
| 14 | rs856684       | C | A | 0.09375 | 0.625   | 0.4706 | Non-genic |
| 14 | rs9323489      | G | A | 0.6094  | 0.1845  | 0.2632 | GPHN      |

|    |                |   |   |         |          |         |           |
|----|----------------|---|---|---------|----------|---------|-----------|
| 14 | rs9323997      | C | T | 0.1562  | 0.6145   | 0.3947  | C14orf177 |
| 15 | rs7167343      | A | G | 0.5312  | 0.8529   | 0.4474  | CYP19A1   |
| 15 | rs1051958<br>7 | G | T | 0.03125 | 0.4012   | 0.1842  | GABRA5    |
| 15 | rs8034824      | G | T | 0.4219  | 0.005814 | 0.2895  | GABRG3    |
| 15 | rs8035064      | C | T | 0.3438  | 0.07558  | 0.2632  | GABRG3    |
| 15 | rs1051957<br>7 | G | A | 0       | 0.3393   | 0.2368  | GABRG3    |
| 15 | rs1382061      | A | G | 0.8281  | 0.5294   | 0.3947  | GABRG3    |
| 15 | rs3101644      | C | T | 0.1094  | 0.4133   | 0.4737  | GABRG3    |
| 15 | rs2899632      | A | G | 0.5625  | 0.1353   | 0.3947  | LIPC      |
| 15 | rs668842       | C | T | 0.03125 | 0.6235   | 0.2105  | FBN1      |
| 15 | rs2033546      | C | A | 0.7969  | 0.1512   | 0.3684  | MEF2A     |
| 15 | rs752028       | T | C | 0.1094  | 0.4688   | 0.3684  | PCSK6     |
| 15 | rs1025145      | A | G | 0.2656  | 0.7798   | 0.4688  | Non-genic |
| 15 | rs1025226      | A | C | 0.4062  | 0.08235  | 0.4211  | EHD4      |
| 15 | rs1032955      | T | C | 0.3906  | 0.1353   | 0.3947  | Non-genic |
| 15 | rs1051867<br>4 | G | T | 0.4531  | 0.6802   | 0.3158  | MAPK6     |
| 15 | rs1051876<br>1 | T | G | 0.4062  | 0.08235  | 0.3684  | UNC13C    |
| 15 | rs1051887<br>3 | A | G | 0.04688 | 0.2798   | 0.08333 | Non-genic |
| 15 | rs1051888<br>3 | T | C | 0.04688 | 0.358    | 0.1579  | Non-genic |
| 15 | rs1051890<br>5 | C | T | 0.5312  | 0.08333  | 0.4211  | C15orf41  |
| 15 | rs1051896<br>6 | C | T | 0.1875  | 0.5941   | 0.2368  | AQP9      |
| 15 | rs1051913<br>2 | A | G | 0       | 0.2561   | 0.07895 | Non-genic |
| 15 | rs1051916<br>9 | A | G | 0.2188  | 0.7326   | 0.2368  | Non-genic |
| 15 | rs1051924<br>6 | C | T | 0.5938  | 0.8193   | 0.5     | ATP8B4    |
| 15 | rs1051925<br>7 | G | A | 0       | 0.2353   | 0.02632 | ATP8B4    |
| 15 | rs1051952<br>5 | A | G | 0       | 0.3547   | 0.1316  | ATP10A    |
| 15 | rs1051968<br>8 | T | C | 0.1719  | 0.593    | 0.3158  | Non-genic |
| 15 | rs1052068<br>8 | C | T | 0.3125  | 0.04706  | 0.1842  | IQGAP1    |
| 15 | rs1052073<br>5 | A | G | 0       | 0.4345   | 0.1842  | Non-genic |
| 15 | rs1350827      | A | G | 0.4677  | 0.1      | 0.4737  | Non-genic |
| 15 | rs1381195      | C | T | 0.07812 | 0.4241   | 0.2368  | Non-genic |
| 15 | rs1454985      | C | T | 0.06667 | 0.4235   | 0.1053  | Non-genic |
| 15 | rs1553893      | C | T | 0.4375  | 0.1084   | 0.3421  | Non-genic |
| 15 | rs1559857      | G | A | 0.3438  | 0.9146   | 0.3333  | Non-genic |
| 15 | rs2017566      | C | T | 0.25    | 0.593    | 0.2632  | Non-genic |
| 15 | rs2043179      | C | T | 0.09375 | 0.4276   | 0.1944  | Non-genic |

|    |                |   |   |         |         |         |           |
|----|----------------|---|---|---------|---------|---------|-----------|
| 15 | rs2113945      | A | G | 0.5781  | 0.1744  | 0.3947  | TRPM1     |
| 15 | rs2255408      | C | A | 0.3281  | 0.1163  | 0.4474  | Non-genic |
| 15 | rs2351000      | A | G | 0.4062  | 0.8471  | 0.4737  | POLG      |
| 15 | rs2404972      | A | G | 0       | 0.3214  | 0.02632 | ETFFA     |
| 15 | rs2412822      | A | G | 0.2656  | 0.8294  | 0.3158  | FRMD5     |
| 15 | rs2414491      | G | A | 0.01562 | 0.4578  | 0.1389  | TCF12     |
| 15 | rs2630         | C | T | 0.0625  | 0.3953  | 0.1842  | Non-genic |
| 15 | rs2899667      | G | A | 0.1875  | 0.6221  | 0.2895  | RORA      |
| 15 | rs2924578      | G | A | 0.2344  | 0.7244  | 0.2     | Non-genic |
| 15 | rs2958394      | C | T | 0.3594  | 0.07558 | 0.3684  | Non-genic |
| 15 | rs3914576      | C | A | 0.5312  | 0.1667  | 0.4474  | Non-genic |
| 15 | rs448458       | T | C | 0.2344  | 0.6235  | 0.3333  | Non-genic |
| 15 | rs4774224      | A | G | 0.04688 | 0.3494  | 0.1053  | Non-genic |
| 15 | rs4774527      | A | G | 0       | 0.3547  | 0.05263 | SHC4      |
| 15 | rs518222       | C | T | 0.03125 | 0.6802  | 0.1316  | Non-genic |
| 15 | rs694985       | T | C | 0.2188  | 0.7529  | 0.4737  | MAP1A     |
| 15 | rs7164710      | T | C | 0.5156  | 0.1905  | 0.3947  | ATP8B4    |
| 15 | rs7175329      | G | A | 0.125   | 0.5482  | 0.2     | NEO1      |
| 15 | rs7181383      | T | C | 0.0625  | 0.6047  | 0.2895  | Non-genic |
| 15 | rs718911       | G | A | 0.4677  | 0.1488  | 0.3684  | RORA      |
| 15 | rs7497094      | C | A | 0.0625  | 0.494   | 0.1579  | Non-genic |
| 15 | rs8026843      | A | C | 0.4375  | 0.8313  | 0.5     | Non-genic |
| 15 | rs8038234      | G | T | 0.2969  | 0.04706 | 0.1842  | Non-genic |
| 15 | rs9302112      | T | C | 0       | 0.6337  | 0.3158  | SNAP23    |
| 15 | rs9302358      | T | C | 0.5938  | 0.04706 | 0.3947  | Non-genic |
| 15 | rs950474       | T | G | 0.6094  | 0.8631  | 0.4211  | Non-genic |
| 15 | rs952993       | G | T | 0.2188  | 0.7952  | 0.4211  | Non-genic |
| 15 | rs956553       | C | T | 0.01562 | 0.4702  | 0.1111  | WDR72     |
| 15 | rs962931       | C | T | 0.3438  | 0.6173  | 0.3611  | Non-genic |
| 15 | rs1038553      | G | A | 0.375   | 0.08642 | 0.2222  | Non-genic |
| 15 | rs1051890<br>6 | A | G | 0.09375 | 0.5988  | 0.3947  | Non-genic |
| 15 | rs1051892<br>0 | C | A | 0.4531  | 0.1353  | 0.2632  | UACA      |
| 15 | rs1051907<br>4 | A | C | 0.09375 | 0.4048  | 0.3333  | RORA      |
| 15 | rs1051924<br>9 | G | A | 0.04688 | 0.4747  | 0.3947  | ATP8B4    |
| 15 | rs1051987<br>4 | G | A | 0.7812  | 0.253   | 0.3684  | RYR3      |
| 15 | rs1051987<br>5 | A | G | 0.7188  | 0.25    | 0.3611  | RYR3      |
| 15 | rs1052006<br>4 | A | G | 0.1406  | 0.5938  | 0.4062  | Non-genic |
| 15 | rs1052064<br>8 | C | T | 0.6719  | 0.2877  | 0.4412  | Non-genic |
| 15 | rs1052068<br>9 | T | C | 0.4688  | 0.05882 | 0.2632  | IQGAP1    |
| 15 | rs1052074<br>5 | C | T | 0.5     | 0.1488  | 0.3056  | MCTP2     |
| 15 | rs1052076      | G | A | 0.01562 | 0.4568  | 0.3158  | Non-genic |

|    |                |   |   |         |         |         |           |
|----|----------------|---|---|---------|---------|---------|-----------|
|    | 3              |   |   |         |         |         |           |
| 15 | rs1052077<br>1 | G | A | 0.2031  | 0.0241  | 0.02632 | Non-genic |
| 15 | rs1052077<br>5 | T | C | 0       | 0.6084  | 0.3158  | Non-genic |
| 15 | rs1224635      | C | T | 0.3438  | 0.07143 | 0.125   | Non-genic |
| 15 | rs1244323<br>7 | G | T | 0.5938  | 0.0814  | 0.2105  | KIAA1199  |
| 15 | rs1369308      | C | T | 0.03125 | 0.375   | 0.2895  | RYR3      |
| 15 | rs1371056      | G | T | 0.03125 | 0.3837  | 0.2632  | PRTG      |
| 15 | rs1372600      | G | A | 0       | 0.4     | 0.3158  | Non-genic |
| 15 | rs1384739      | C | T | 0.4688  | 0.1453  | 0.2105  | Non-genic |
| 15 | rs1559776      | T | C | 0.75    | 0.2381  | 0.3889  | GCOM1     |
| 15 | rs1867197      | A | G | 0.0625  | 0.3902  | 0.25    | SCAPER    |
| 15 | rs1948133      | C | T | 0.04688 | 0.5357  | 0.3421  | C15orf32  |
| 15 | rs2388299      | G | A | 0.04688 | 0.2917  | 0.2778  | Non-genic |
| 15 | rs2440359      | G | A | 0.25    | 0.6512  | 0.4737  | Non-genic |
| 15 | rs2863274      | C | T | 0       | 0.2917  | 0.2105  | Non-genic |
| 15 | rs335505       | G | T | 0.7031  | 0.08434 | 0.3421  | Non-genic |
| 15 | rs4128766      | A | G | 0.5938  | 0.08235 | 0.1579  | IL16      |
| 15 | rs4294760      | C | A | 0.01562 | 0.3412  | 0.1842  | Non-genic |
| 15 | rs4332691      | T | C | 0       | 0.4118  | 0.2353  | WDR72     |
| 15 | rs4779061      | G | T | 0       | 0.2965  | 0.1842  | FSD2      |
| 15 | rs4984391      | C | T | 0.6875  | 0.3716  | 0.3571  | MCTP2     |
| 15 | rs4984419      | T | C | 0.01562 | 0.3765  | 0.2632  | Non-genic |
| 15 | rs649526       | T | C | 0.1719  | 0.6047  | 0.4474  | PLA2G4F   |
| 15 | rs6496239      | G | A | 0.375   | 0.08929 | 0.1579  | Non-genic |
| 15 | rs671291       | G | A | 0.7188  | 0.2619  | 0.4412  | Non-genic |
| 15 | rs7173947      | C | T | 0.5     | 0.2073  | 0.3529  | Non-genic |
| 15 | rs7181323      | T | C | 0.125   | 0.5929  | 0.4118  | Non-genic |
| 15 | rs719176       | A | G | 0.6719  | 0.125   | 0.3421  | SV2B      |
| 15 | rs719704       | C | T | 0.7969  | 0.2558  | 0.4737  | Non-genic |
| 15 | rs723831       | T | C | 0.09375 | 0.1047  | 0.2895  | C15orf41  |
| 15 | rs726914       | A | G | 0       | 0.321   | 0.1842  | RORA      |
| 15 | rs728401       | G | A | 0.5781  | 0.25    | 0.3947  | CORO2B    |
| 15 | rs7495471      | C | T | 0.8594  | 0.4062  | 0.4167  | MCTP2     |
| 15 | rs8030971      | G | A | 0.6094  | 0.1882  | 0.3158  | ATPBD4    |
| 15 | rs8038077      | C | T | 0.5469  | 0.1395  | 0.2368  | RORA      |
| 16 | rs1833161      | C | T | 0.625   | 0.2317  | 0.4474  | GRIN2A    |
| 16 | rs1992116      | A | G | 0.1406  | 0.4506  | 0.2105  | MMP2      |
| 16 | rs243840       | G | A | 0.625   | 0.2035  | 0.3158  | MMP2      |
| 16 | rs1049287<br>2 | G | T | 0       | 0.3291  | 0.1667  | FTO       |
| 16 | rs1362571      | G | T | 0.1406  | 0.5422  | 0.3421  | FTO       |
| 16 | rs2059283      | T | G | 0.2656  | 0.657   | 0.3158  | XYLT1     |
| 16 | rs1023442      | A | G | 0.2812  | 0.7267  | 0.3824  | Non-genic |
| 16 | rs1049284<br>1 | T | C | 0.04688 | 0.5427  | 0.25    | RBFOX1    |
| 16 | rs1049285<br>2 | A | G | 0.04688 | 0.3663  | 0.02632 | TXNDC11   |

|    |                |   |   |         |         |         |           |
|----|----------------|---|---|---------|---------|---------|-----------|
| 16 | rs1050035<br>6 | C | T | 0.3281  | 0.6686  | 0.3684  | RBFOX1    |
| 16 | rs1050046<br>1 | A | G | 0.1094  | 0.2048  | 0.1053  | Non-genic |
| 16 | rs1050055<br>8 | G | A | 0.03125 | 0.5291  | 0.1842  | Non-genic |
| 16 | rs1051455<br>0 | C | T | 0       | 0.2529  | 0.05263 | CDH13     |
| 16 | rs1051883<br>8 | G | A | 0       | 0.2209  | 0.02632 | NETO2     |
| 16 | rs1052108<br>5 | T | C | 0.01562 | 0.1588  | 0.05263 | RBFOX1    |
| 16 | rs1052109<br>6 | T | C | 0.125   | 0.4588  | 0.1842  | Non-genic |
| 16 | rs1052119<br>2 | A | G | 0.2188  | 0.5482  | 0.3684  | ZNF423    |
| 16 | rs1052122<br>1 | T | C | 0.2656  | 0.7209  | 0.4737  | Non-genic |
| 16 | rs1345849      | G | A | 0.3125  | 0.7588  | 0.4737  | Non-genic |
| 16 | rs1383361      | T | C | 0.1406  | 0.5294  | 0.1579  | Non-genic |
| 16 | rs150583       | A | G | 0.03125 | 0.4176  | 0.07895 | OTOA      |
| 16 | rs150728       | C | T | 0       | 0.2384  | 0.05263 | Non-genic |
| 16 | rs1553614      | A | G | 0.5781  | 0.1951  | 0.4444  | RBFOX1    |
| 16 | rs1557811      | C | T | 0.03125 | 0.34    | 0.1667  | CACNG3    |
| 16 | rs1560278      | G | A | 0.4688  | 0.8314  | 0.5     | Non-genic |
| 16 | rs1898680      | T | G | 0.7031  | 0.2412  | 0.4737  | Non-genic |
| 16 | rs2113143      | C | T | 0.2656  | 0.5765  | 0.3947  | EEF2K     |
| 16 | rs2291959      | T | G | 0.03125 | 0.3155  | 0.07895 | WWP2      |
| 16 | rs2361075      | C | A | 0.1719  | 0.527   | 0.3158  | Non-genic |
| 16 | rs35201        | T | C | 0.5625  | 0.1071  | 0.3947  | CDH11     |
| 16 | rs3815826      | C | T | 0.03125 | 0.4176  | 0.07895 | GLG1      |
| 16 | rs3922878      | A | C | 0.2656  | 0.814   | 0.2632  | Non-genic |
| 16 | rs7185078      | G | A | 0.2969  | 0.8198  | 0.4474  | Non-genic |
| 16 | rs7196605      | C | T | 0.3594  | 0.0407  | 0.3684  | Non-genic |
| 16 | rs7204986      | T | C | 0.3594  | 0.8247  | 0.3333  | CACNG3    |
| 16 | rs7205534      | A | G | 0.1719  | 0.6353  | 0.3421  | MPHOSPH6  |
| 16 | rs728571       | T | C | 0       | 0.2857  | 0.05263 | Non-genic |
| 16 | rs7404645      | A | G | 0       | 0.2778  | 0.1053  | CDH13     |
| 16 | rs753808       | T | C | 0       | 0.3795  | 0.07895 | Non-genic |
| 16 | rs8045450      | A | C | 0.3594  | 0.8118  | 0.4474  | WVOX      |
| 16 | rs8058333      | C | T | 0.5312  | 0.7353  | 0.3684  | ADAMTS18  |
| 16 | rs8058376      | C | T | 0.3594  | 0.05814 | 0.2632  | ZNRF1     |
| 16 | rs889608       | G | A | 0.6094  | 0.1386  | 0.4474  | Non-genic |
| 16 | rs9452         | T | G | 0       | 0.186   | 0.07895 | SNX29     |
| 16 | rs1050033<br>5 | T | C | 0.07812 | 0.4803  | 0.3824  | RBFOX1    |
| 16 | rs1050036<br>2 | A | G | 0.01562 | 0.4294  | 0.2895  | Non-genic |
| 16 | rs1050040<br>8 | A | G | 0.1562  | 0.506   | 0.3421  | Non-genic |
| 16 | rs1051445      | G | A | 0.5469  | 0.1786  | 0.3056  | Non-genic |

|    |            |   |   |         |         |         |           |
|----|------------|---|---|---------|---------|---------|-----------|
|    | 4          |   |   |         |         |         |           |
| 16 | rs10514506 | C | T | 0.01562 | 0.4878  | 0.2895  | CDYL2     |
| 16 | rs10521220 | A | G | 0.1094  | 0.5181  | 0.3421  | Non-genic |
| 16 | rs10521238 | A | G | 0.7656  | 0.253   | 0.4211  | Non-genic |
| 16 | rs11076556 | C | T | 0.7812  | 0.07558 | 0.4211  | Non-genic |
| 16 | rs1160166  | C | T | 0.2031  | 0.5915  | 0.4474  | Non-genic |
| 16 | rs1397133  | G | A | 0.4375  | 0.0814  | 0.1053  | CDH8      |
| 16 | rs1484032  | G | T | 0.7188  | 0.3824  | 0.4737  | Non-genic |
| 16 | rs1557810  | C | T | 0.0625  | 0.3514  | 0.3571  | CACNG3    |
| 16 | rs1922608  | A | G | 0.8281  | 0.3988  | 0.4444  | CLEC3A    |
| 16 | rs1946127  | G | A | 0.6719  | 0.3974  | 0.2353  | RBFOX1    |
| 16 | rs2035247  | G | T | 0.7031  | 0.25    | 0.3421  | RBFOX1    |
| 16 | rs2161662  | T | C | 0.6719  | 0.2162  | 0.4333  | Non-genic |
| 16 | rs30126    | T | C | 0.5469  | 0.1453  | 0.1842  | MKL2      |
| 16 | rs4785235  | T | C | 0.6562  | 0.1488  | 0.3158  | Non-genic |
| 16 | rs7187075  | T | C | 0.5781  | 0.1047  | 0.2105  | CDYL2     |
| 16 | rs7202468  | T | C | 0.1875  | 0.5814  | 0.4474  | Non-genic |
| 16 | rs7206138  | C | T | 0.1875  | 0.5581  | 0.5     | Non-genic |
| 16 | rs726239   | T | G | 0       | 0.4059  | 0.25    | Non-genic |
| 16 | rs9319534  | T | G | 0.2344  | 0.5769  | 0.4167  | WWOX      |
| 17 | rs10512461 | G | A | 0.01562 | 0.3588  | 0.1053  | ACCN1     |
| 17 | rs2881782  | A | C | 0.1719  | 0.5549  | 0.2632  | ACCN1     |
| 17 | rs317342   | A | G | 0.1406  | 0.6131  | 0.3684  | ACCN1     |
| 17 | rs319760   | C | T | 0.03125 | 0.4529  | 0.1316  | ACCN1     |
| 17 | rs63953    | A | G | 0.3906  | 0.7711  | 0.5     | ACCN1     |
| 17 | rs317343   | G | A | 0.01562 | 0.1585  | 0.1053  | ACCN1     |
| 17 | rs2889529  | A | G | 0.1452  | 0.6453  | 0.3421  | TIMP2     |
| 17 | rs4328485  | C | A | 0.2344  | 0.5595  | 0.1842  | KCNJ2     |
| 17 | rs10491093 | T | G | 0.6562  | 0.1882  | 0.4706  | Non-genic |
| 17 | rs10491187 | C | T | 0.1406  | 0.7976  | 0.3947  | Non-genic |
| 17 | rs10491197 | G | A | 0.4219  | 0.07229 | 0.2778  | Non-genic |
| 17 | rs10512532 | C | T | 0.3281  | 0.8354  | 0.3611  | Non-genic |
| 17 | rs10512536 | C | T | 0       | 0.08929 | 0.02632 | Non-genic |
| 17 | rs10514990 | A | C | 0.07812 | 0.2746  | 0.1471  | CA10      |
| 17 | rs10515075 | T | C | 0.03125 | 0.3547  | 0.05263 | Non-genic |
| 17 | rs10521205 | C | T | 0.0625  | 0.2616  | 0.02632 | ARHGAP44  |
| 17 | rs10521264 | T | C | 0.375   | 0.02326 | 0.2632  | COX10     |
| 17 | rs1460213  | A | G | 0       | 0.2733  | 0.1053  | MYCBPAP   |

|    |                |   |   |         |         |         |                |
|----|----------------|---|---|---------|---------|---------|----------------|
| 17 | rs1468482      | T | C | 0.5781  | 0.8256  | 0.4474  | Non-genic      |
| 17 | rs1540373      | A | G | 0       | 0.3125  | 0.05882 | Non-genic      |
| 17 | rs1588751      | C | T | 0.2031  | 0.8875  | 0.4167  | Non-genic      |
| 17 | rs159316       | T | G | 0.5312  | 0.1084  | 0.3333  | CCL13          |
| 17 | rs181224       | G | A | 0.2188  | 0.8471  | 0.4706  | Non-genic      |
| 17 | rs2132796      | C | T | 0.01562 | 0.3837  | 0.1316  | Non-genic      |
| 17 | rs2302740      | T | C | 0.2031  | 0.5756  | 0.2105  | Non-genic      |
| 17 | rs237259       | G | A | 0.1562  | 0.872   | 0.5     | Non-genic      |
| 17 | rs237302       | C | T | 0.1406  | 0.6941  | 0.3684  | Non-genic      |
| 17 | rs2462957      | G | A | 0.125   | 0.5116  | 0.2778  | Non-genic      |
| 17 | rs3682         | A | G | 0.07812 | 0.5523  | 0.2632  | ACOX1          |
| 17 | rs3851021      | A | G | 0.4219  | 0.06977 | 0.3421  | ITGB4          |
| 17 | rs4141125      | C | T | 0.0625  | 0.3125  | 0.0625  | CA10           |
| 17 | rs440655       | G | T | 0.3438  | 0.686   | 0.4474  | TMEM220        |
| 17 | rs4792515      | C | T | 0.1094  | 0.4477  | 0.2105  | Non-genic      |
| 17 | rs719430       | C | T | 0.04688 | 0.4535  | 0.25    | ST6GALNAC<br>1 |
| 17 | rs7224296      | A | G | 0.2031  | 0.7927  | 0.4737  | NSF            |
| 17 | rs725543       | T | C | 0       | 0.2353  | 0       | Non-genic      |
| 17 | rs758112       | A | G | 0.03125 | 0.3554  | 0.1053  | Non-genic      |
| 17 | rs8067401      | C | T | 0.6875  | 0.1453  | 0.4474  | PIPOX          |
| 17 | rs8068052      | C | T | 0.5156  | 0.1928  | 0.5     | Non-genic      |
| 17 | rs8078470      | G | A | 0.1875  | 0.6488  | 0.3947  | SLFN13         |
| 17 | rs9303599      | C | T | 0.4219  | 0.7533  | 0.4412  | Non-genic      |
| 17 | rs938298       | C | T | 0.2812  | 0.6802  | 0.4737  | SLFN11         |
| 17 | rs1005628      | G | A | 0.09375 | 0.4821  | 0.3684  | Non-genic      |
| 17 | rs1019156      | G | A | 0.3438  | 0.03571 | 0.1842  | Non-genic      |
| 17 | rs1049119<br>6 | C | A | 0.3871  | 0.05625 | 0.1842  | Non-genic      |
| 17 | rs1049120<br>4 | C | T | 0       | 0.2616  | 0.1316  | PRKCA          |
| 17 | rs1051513<br>0 | A | G | 0.01562 | 0.6412  | 0.4737  | Non-genic      |
| 17 | rs1367950      | T | C | 0.04688 | 0.4419  | 0.2632  | ITGAE          |
| 17 | rs1478785      | A | G | 0.0625  | 0.7941  | 0.4706  | NUP85          |
| 17 | rs1860351      | A | G | 0.3438  | 0.1139  | 0.1316  | Non-genic      |
| 17 | rs1860574      | C | T | 0.125   | 0.5357  | 0.3947  | MBTD1          |
| 17 | rs196948       | T | C | 0.7188  | 0.25    | 0.4737  | ERN1           |
| 17 | rs2001486      | A | G | 0.1719  | 0.5529  | 0.4211  | GLP2R          |
| 17 | rs2017571      | C | T | 0.1094  | 0.4267  | 0.2941  | ACACA          |
| 17 | rs2106852      | C | T | 0.7656  | 0.2118  | 0.4444  | Non-genic      |
| 17 | rs2108606      | C | T | 0.7656  | 0.4107  | 0.4737  | MYH4           |
| 17 | rs2176324      | A | G | 0.5312  | 0.2035  | 0.3158  | ZZEF1          |
| 17 | rs223128       | T | G | 0.8281  | 0.4826  | 0.4474  | Non-genic      |
| 17 | rs2331543      | A | G | 0.7812  | 0.1562  | 0.3667  | Non-genic      |
| 17 | rs2430557      | A | G | 0.5625  | 0.1919  | 0.2368  | Non-genic      |
| 17 | rs2886048      | T | C | 0.6562  | 0.128   | 0.2188  | ABCA6          |
| 17 | rs2960089      | C | T | 0.5312  | 0.1824  | 0.1842  | TMEM100        |
| 17 | rs350009       | T | G | 0.0625  | 0.4695  | 0.3611  | Non-genic      |



|    |                |   |   |         |         |         |           |
|----|----------------|---|---|---------|---------|---------|-----------|
| 17 | rs4548936      | G | A | 0.07812 | 0.5128  | 0.3889  | Non-genic |
| 17 | rs4644888      | C | T | 0.2656  | 0.6047  | 0.4737  | PRKCA     |
| 17 | rs7213125      | A | G | 0.5938  | 0.1429  | 0.2647  | TTC19     |
| 17 | rs7219451      | T | C | 0.1406  | 0.5412  | 0.3947  | KRT28     |
| 17 | rs7222656      | A | G | 0.625   | 0.2215  | 0.2895  | Non-genic |
| 17 | rs725923       | C | T | 0.1562  | 0.5361  | 0.3684  | Non-genic |
| 17 | rs7406059      | C | T | 0.03125 | 0.1882  | 0.3056  | Non-genic |
| 17 | rs8074185      | C | T | 0.25    | 0.6205  | 0.5     | CA10      |
| 17 | rs8077944      | G | A | 0.01562 | 0.5349  | 0.3684  | MAP2K6    |
| 17 | rs913438       | T | C | 0.09375 | 0.5698  | 0.4474  | Non-genic |
| 17 | rs918077       | G | A | 0.7344  | 0.1524  | 0.3889  | Non-genic |
| 17 | rs929585       | A | G | 0.09375 | 0.6951  | 0.3947  | ANKFN1    |
| 17 | rs9302940      | T | G | 0.5     | 0.04545 | 0.07692 | Non-genic |
| 17 | rs9303681      | T | C | 0.7344  | 0.1802  | 0.3684  | RFFL      |
| 18 | rs1013459      | A | G | 0.2812  | 0.9244  | 0.4737  | GNAL      |
| 18 | rs9303743      | T | C | 0.6719  | 0.05233 | 0.2895  | GNAL      |
| 18 | rs8087768      | T | G | 0.2969  | 0.657   | 0.4211  | CNDP1     |
| 18 | rs8083963      | T | C | 0.4531  | 0.1235  | 0.3947  | NEDD4L    |
| 18 | rs1050244<br>1 | G | A | 0.1719  | 0.4398  | 0.1579  | LAMA3     |
| 18 | rs1050252<br>5 | A | G | 0.5781  | 0.8313  | 0.5     | Non-genic |
| 18 | rs1050254<br>1 | G | A | 0.01562 | 0.1296  | 0       | Non-genic |
| 18 | rs1050268<br>3 | A | G | 0       | 0.2765  | 0.05263 | Non-genic |
| 18 | rs1050272<br>5 | A | C | 0.04688 | 0.4176  | 0.2105  | Non-genic |
| 18 | rs1050278<br>2 | A | G | 0.2031  | 0.01948 | 0.2778  | Non-genic |
| 18 | rs1050301<br>4 | C | T | 0.5312  | 0.2308  | 0.4118  | Non-genic |
| 18 | rs1050303<br>2 | A | G | 0.1094  | 0.4647  | 0.2105  | CCBE1     |
| 18 | rs1050309<br>4 | C | A | 0       | 0.09884 | 0.02632 | Non-genic |
| 18 | rs1051396<br>5 | T | C | 0.2188  | 0.5833  | 0.3947  | DOK6      |
| 18 | rs1051405<br>6 | C | T | 0.1094  | 0.7412  | 0.3947  | NETO1     |
| 18 | rs1051419<br>1 | A | G | 0.625   | 0.0407  | 0.4211  | Non-genic |
| 18 | rs1051600<br>1 | G | A | 0.07812 | 0.2945  | 0.02941 | Non-genic |
| 18 | rs1113144      | G | T | 0.5156  | 0.8837  | 0.4211  | FBXO15    |
| 18 | rs121317       | T | C | 0.5312  | 0.1131  | 0.4737  | Non-genic |
| 18 | rs1217566      | C | T | 0.4375  | 0.907   | 0.5     | Non-genic |
| 18 | rs1284427      | A | G | 0.4844  | 0.128   | 0.3684  | C18orf1   |
| 18 | rs1369766      | T | C | 0.1094  | 0.6412  | 0.3684  | Non-genic |
| 18 | rs1374108      | G | A | 0.5312  | 0.869   | 0.4474  | PTPRM     |
| 18 | rs1380085      | C | T | 0.1875  | 0.7346  | 0.3684  | FAM59A    |

|    |           |   |   |         |         |         |           |
|----|-----------|---|---|---------|---------|---------|-----------|
| 18 | rs1383525 | G | A | 0.1719  | 0.6829  | 0.3421  | Non-genic |
| 18 | rs1397057 | A | G | 0.1562  | 0.5353  | 0.3421  | Non-genic |
| 18 | rs1403301 | A | G | 0.1719  | 0.5797  | 0.3214  | SERPINB11 |
| 18 | rs1443002 | C | T | 0.2656  | 0.03571 | 0.2895  | Non-genic |
| 18 | rs1445089 | A | G | 0.4107  | 0.7143  | 0.3611  | Non-genic |
| 18 | rs1543229 | A | G | 0.2812  | 0.756   | 0.3684  | Non-genic |
| 18 | rs1545112 | A | G | 0.2188  | 0.5133  | 0.2632  | Non-genic |
| 18 | rs1545814 | T | C | 0.3906  | 0.6726  | 0.4474  | Non-genic |
| 18 | rs1662813 | C | T | 0.4688  | 0.8471  | 0.4737  | Non-genic |
| 18 | rs1833422 | T | G | 0.5625  | 0.2333  | 0.4211  | Non-genic |
| 18 | rs1852893 | A | G | 0.1562  | 0.7561  | 0.3611  | Non-genic |
| 18 | rs1893212 | G | A | 0.03125 | 0.2381  | 0       | Non-genic |
| 18 | rs1941915 | C | T | 0.2969  | 0.6807  | 0.3824  | Non-genic |
| 18 | rs1943228 | G | A | 0       | 0.2     | 0.08333 | Non-genic |
| 18 | rs1943984 | T | G | 0.4375  | 0.1012  | 0.4375  | Non-genic |
| 18 | rs2040195 | G | A | 0.4194  | 0.6975  | 0.2632  | Non-genic |
| 18 | rs218286  | T | C | 0.625   | 0.1118  | 0.4737  | TMX3      |
| 18 | rs271491  | T | C | 0.4062  | 0.09524 | 0.2632  | C18orf34  |
| 18 | rs304409  | C | T | 0.1875  | 0.7616  | 0.3684  | Non-genic |
| 18 | rs3786256 | G | A | 0       | 0.179   | 0.02632 | DOK6      |
| 18 | rs3884522 | A | C | 0.01562 | 0.1867  | 0.02778 | Non-genic |
| 18 | rs4116712 | T | C | 0.1667  | 0.7384  | 0.3421  | Non-genic |
| 18 | rs4129498 | T | G | 0.07812 | 0.3519  | 0.1765  | Non-genic |
| 18 | rs4131454 | T | C | 0.4844  | 0.1369  | 0.4474  | ZNF521    |
| 18 | rs459329  | T | C | 0.5     | 0.1471  | 0.3947  | Non-genic |
| 18 | rs470490  | G | T | 0.03125 | 0.3452  | 0.1176  | Non-genic |
| 18 | rs4798593 | C | T | 0.4688  | 0.744   | 0.3684  | PTPRM     |
| 18 | rs4891158 | T | C | 0.4844  | 0.7976  | 0.4474  | Non-genic |
| 18 | rs538445  | C | T | 0.01562 | 0.5714  | 0.1842  | RIT2      |
| 18 | rs543224  | T | C | 0.7031  | 0.1772  | 0.4706  | Non-genic |
| 18 | rs585955  | T | G | 0.07812 | 0.4471  | 0.1579  | Non-genic |
| 18 | rs619825  | A | G | 0.2031  | 0.5     | 0.2105  | Non-genic |
| 18 | rs633691  | A | C | 0.1094  | 0.4759  | 0.1579  | LAMA1     |
| 18 | rs6506216 | A | G | 0.0625  | 0.7209  | 0.1316  | Non-genic |
| 18 | rs690311  | C | A | 0.04688 | 0.436   | 0.1842  | KIAA0802  |
| 18 | rs721881  | A | C | 0.3281  | 0.5872  | 0.2895  | Non-genic |
| 18 | rs7231421 | T | C | 0.2969  | 0.03529 | 0.2895  | RNF165    |
| 18 | rs7237402 | G | A | 0.5     | 0.6867  | 0.2632  | Non-genic |
| 18 | rs7243673 | C | T | 0.2812  | 0.7134  | 0.3529  | PTPRM     |
| 18 | rs727929  | A | G | 0.3438  | 0.8488  | 0.4474  | Non-genic |
| 18 | rs8089921 | T | C | 0.01562 | 0.2917  | 0.1053  | NETO1     |
| 18 | rs894565  | T | C | 0.2812  | 0.06471 | 0.1842  | MYOM1     |
| 18 | rs920730  | A | G | 0.4062  | 0.1686  | 0.5     | ZNF407    |
| 18 | rs9304112 | C | T | 0.4375  | 0.06329 | 0.4167  | KLHL14    |
| 18 | rs9304215 | T | C | 0.03125 | 0.2647  | 0.07895 | Non-genic |
| 18 | rs9304458 | C | A | 0.3906  | 0.7134  | 0.5     | OSBPL1A   |
| 18 | rs951666  | A | G | 0.3281  | 0.8081  | 0.4211  | Non-genic |
| 18 | rs952428  | C | T | 0.4219  | 0.04651 | 0.2368  | LAMA1     |

|    |                |   |   |         |         |        |           |
|----|----------------|---|---|---------|---------|--------|-----------|
| 18 | rs970238       | A | G | 0.3125  | 0.657   | 0.3421 | Non-genic |
| 18 | rs973060       | G | A | 0.5156  | 0.1145  | 0.4474 | Non-genic |
| 18 | rs1016425      | C | T | 0       | 0.4157  | 0.3421 | Non-genic |
| 18 | rs1050233<br>0 | T | G | 0.6562  | 0.2588  | 0.3421 | EPB41L3   |
| 18 | rs1050238<br>8 | G | A | 0.01562 | 0.4884  | 0.3056 | Non-genic |
| 18 | rs1050243<br>2 | G | A | 0.1875  | 0.4353  | 0.4211 | Non-genic |
| 18 | rs1050252<br>7 | A | G | 0.0625  | 0.4762  | 0.3421 | Non-genic |
| 18 | rs1050309<br>0 | C | T | 0.07812 | 0.4551  | 0.2941 | Non-genic |
| 18 | rs1050313<br>7 | G | A | 0.4531  | 0.05696 | 0.1471 | CCDC102B  |
| 18 | rs1051415<br>7 | T | C | 0.04688 | 0.2941  | 0.2105 | Non-genic |
| 18 | rs1893144      | T | C | 0.09375 | 0.5349  | 0.3421 | Non-genic |
| 18 | rs1942150      | G | A | 0.5312  | 0.1647  | 0.3421 | RALBP1    |
| 18 | rs2042729      | T | C | 0.4062  | 0.04375 | 0.2105 | SERPINB10 |
| 18 | rs2298532      | G | A | 0.09375 | 0.4643  | 0.2895 | Non-genic |
| 18 | rs2868932      | G | T | 0.7812  | 0.3765  | 0.4737 | Non-genic |
| 18 | rs3859405      | C | T | 0.7812  | 0.3375  | 0.3421 | Non-genic |
| 18 | rs4602126      | T | C | 0.7344  | 0.1512  | 0.3947 | RNF165    |
| 18 | rs475598       | C | T | 0.07812 | 0.6977  | 0.4474 | LAMA1     |
| 18 | rs482570       | A | G | 0.5312  | 0.1786  | 0.2895 | Non-genic |
| 18 | rs4940595      | G | T | 0.6406  | 0.2442  | 0.3889 | SERPINB11 |
| 18 | rs4997493      | C | T | 0.1719  | 0.5872  | 0.4474 | Non-genic |
| 18 | rs518111       | G | A | 0.1875  | 0.5476  | 0.3947 | MAPRE2    |
| 18 | rs560098       | T | C | 0.07812 | 0.4709  | 0.2895 | Non-genic |
| 18 | rs612913       | A | G | 0.2812  | 0.03488 | 0.1579 | Non-genic |
| 18 | rs667508       | G | A | 0.6719  | 0.2384  | 0.2895 | ONECUT2   |
| 18 | rs690378       | G | A | 0.4844  | 0.1446  | 0.2895 | ZNF516    |
| 18 | rs724879       | G | A | 0.07812 | 0.5465  | 0.3947 | Non-genic |
| 18 | rs724881       | C | T | 0.4688  | 0.1163  | 0.2222 | Non-genic |
| 18 | rs930909       | C | T | 0.1406  | 0.6039  | 0.3947 | RBBP8     |
| 18 | rs965976       | G | A | 0.7031  | 0.2597  | 0.4211 | Non-genic |
| 18 | rs968668       | A | C | 0.8281  | 0.07059 | 0.3947 | C18orf34  |
| 19 | rs688          | T | C | 0.03125 | 0.4643  | 0.1579 | LDLR      |
| 19 | rs1709084      | G | A | 0.2344  | 0.07059 | 0.3684 | CYP2A13   |
| 19 | rs1050026<br>1 | G | A | 0.125   | 0.4643  | 0.1579 | Non-genic |
| 19 | rs1051360<br>6 | T | C | 0.2812  | 0.04118 | 0.3158 | Non-genic |
| 19 | rs1051824<br>7 | G | A | 0.4531  | 0.04706 | 0.2632 | Non-genic |
| 19 | rs1073653      | A | G | 0.1562  | 0.5471  | 0.2105 | Non-genic |
| 19 | rs2037735      | T | C | 0.4375  | 0.08235 | 0.4211 | NAPA      |
| 19 | rs2161250      | C | T | 0.2969  | 0.686   | 0.3684 | CACNA1A   |
| 19 | rs2241721      | C | T | 0.0625  | 0.4118  | 0.1053 | LIG1      |
| 19 | rs2361128      | G | A | 0.3281  | 0.7118  | 0.4737 | Non-genic |

|    |                |   |   |         |         |         |           |
|----|----------------|---|---|---------|---------|---------|-----------|
| 19 | rs2571081      | A | G | 0.03125 | 0.5813  | 0.2632  | Non-genic |
| 19 | rs4805877      | A | G | 0.2031  | 0.6529  | 0.3684  | PEPD      |
| 19 | rs6508962      | G | A | 0.1875  | 0.6047  | 0.3158  | Non-genic |
| 19 | rs717225       | A | G | 0.2344  | 0.8721  | 0.4211  | ARHGEF1   |
| 19 | rs754292       | T | C | 0.07812 | 0.6145  | 0.3158  | MED26     |
| 19 | rs8111998      | T | C | 0.7097  | 0.1707  | 0.4474  | Non-genic |
| 19 | rs8113805      | G | A | 0.2031  | 0.7262  | 0.3611  | EMR1      |
| 19 | rs836896       | T | C | 0.2031  | 0.7412  | 0.3421  | ZNF486    |
| 19 | rs9305000      | A | G | 0.5938  | 0.1205  | 0.4211  | Non-genic |
| 19 | rs1052020<br>3 | T | C | 0.01562 | 0.1337  | 0.07895 | CHST8     |
| 19 | rs1052021<br>1 | G | T | 0.2812  | 0.04706 | 0.1053  | LSM14A    |
| 19 | rs1293700      | G | A | 0.8438  | 0.3176  | 0.4211  | Non-genic |
| 19 | rs2112527      | G | A | 0.4219  | 0.1279  | 0.1579  | ZNF560    |
| 19 | rs286300       | T | C | 0.7656  | 0.1221  | 0.3947  | TRPC7     |
| 19 | rs3786777      | C | A | 0       | 0.6337  | 0.3421  | SEPW1     |
| 19 | rs502110       | A | G | 0.6406  | 0.2151  | 0.2895  | ZNF345    |
| 19 | rs718258       | A | G | 0.75    | 0.3706  | 0.3684  | CYP4F3    |
| 19 | rs739453       | A | G | 0.5625  | 0.2674  | 0.2632  | Non-genic |
| 19 | rs754291       | A | G | 0.1719  | 0.6     | 0.4474  | MED26     |
| 19 | rs9304608      | T | C | 0.6406  | 0.1395  | 0.2632  | Non-genic |
| 19 | rs9304930      | C | T | 0.375   | 0.07558 | 0.07895 | ACSBG2    |
| 20 | rs363032       | C | T | 0.6094  | 0.1221  | 0.3684  | SNAP25    |
| 20 | rs951843       | T | C | 0.6094  | 0.2471  | 0.3684  | PCSK2     |
| 20 | rs1028846      | A | G | 0.1562  | 0.6076  | 0.25    | Non-genic |
| 20 | rs1048558<br>7 | G | A | 0.0625  | 0.4477  | 0.2105  | Non-genic |
| 20 | rs1048563<br>5 | C | A | 0       | 0.2151  | 0.1053  | Non-genic |
| 20 | rs1048563<br>6 | A | G | 0.01562 | 0.2151  | 0.1053  | Non-genic |
| 20 | rs1048567<br>1 | C | T | 0       | 0.4286  | 0.2105  | Non-genic |
| 20 | rs1048572<br>8 | C | T | 0       | 0.2176  | 0.05556 | PLCB1     |
| 20 | rs1048573<br>7 | G | A | 0.07812 | 0.3779  | 0.07895 | Non-genic |
| 20 | rs1048574<br>7 | C | T | 0.09375 | 0.3598  | 0.1053  | Non-genic |
| 20 | rs1048579<br>1 | G | A | 0.3281  | 0.07059 | 0.2105  | Non-genic |
| 20 | rs1051234      | C | T | 0.3281  | 0.07647 | 0.2895  | DSTN      |
| 20 | rs1073519      | C | T | 0.03125 | 0.5125  | 0.1667  | Non-genic |
| 20 | rs1073768      | T | C | 0       | 0.625   | 0.1842  | Non-genic |
| 20 | rs1299153      | A | G | 0.09375 | 0.5706  | 0.2632  | Non-genic |
| 20 | rs1570485      | A | G | 0.09375 | 0.5529  | 0.1579  | MACROD2   |
| 20 | rs1981429      | T | G | 0.2812  | 0.6977  | 0.4211  | SDC4      |
| 20 | rs2145078      | A | G | 0       | 0.5756  | 0.1842  | Non-genic |
| 20 | rs2180566      | T | C | 0.3281  | 0.7706  | 0.5     | Non-genic |
| 20 | rs2328411      | C | T | 0.5625  | 0.1686  | 0.4167  | SLC24A3   |

|    |                |   |   |         |         |         |           |
|----|----------------|---|---|---------|---------|---------|-----------|
| 20 | rs234623       | G | A | 0       | 0.619   | 0.2895  | Non-genic |
| 20 | rs2876404      | T | C | 0.07812 | 0.6566  | 0.2105  | MACROD2   |
| 20 | rs354747       | A | G | 0.0625  | 0.7024  | 0.3421  | Non-genic |
| 20 | rs3848731      | A | G | 0.1562  | 0.4826  | 0.2632  | Non-genic |
| 20 | rs405970       | G | A | 0.375   | 0.06395 | 0.4211  | Non-genic |
| 20 | rs411944       | G | A | 0.375   | 0.6941  | 0.4737  | MACROD2   |
| 20 | rs4142394      | C | T | 0.3125  | 0.02941 | 0.1944  | TOP1      |
| 20 | rs421630       | T | G | 0.5968  | 0.7593  | 0.4706  | Non-genic |
| 20 | rs4810321      | C | T | 0.1406  | 0.6813  | 0.3684  | CHD6      |
| 20 | rs4813327      | T | C | 0.2969  | 0.04651 | 0.3158  | C20orf12  |
| 20 | rs4814335      | A | G | 0.03125 | 0.2917  | 0.02632 | MACROD2   |
| 20 | rs6021120      | G | A | 0.4375  | 0.01163 | 0.3684  | Non-genic |
| 20 | rs6023367      | G | A | 0.04688 | 0.9268  | 0.4722  | DOK5      |
| 20 | rs6032142      | C | T | 0.125   | 0.5059  | 0.2895  | SYS1      |
| 20 | rs6035452      | A | G | 0.03125 | 0.3395  | 0.1579  | Non-genic |
| 20 | rs6056500      | C | A | 0.2969  | 0.09524 | 0.4211  | PLCB4     |
| 20 | rs6067282      | C | T | 0.1719  | 0.6221  | 0.2632  | RNF114    |
| 20 | rs6085728      | G | A | 0.1562  | 0.3235  | 0.2105  | Non-genic |
| 20 | rs6085806      | G | T | 0.1094  | 0.6588  | 0.2632  | Non-genic |
| 20 | rs6088901      | T | C | 0.0625  | 0.6768  | 0.2105  | DEFB115   |
| 20 | rs6092111      | A | G | 0.5312  | 0.1566  | 0.3889  | Non-genic |
| 20 | rs6106144      | G | A | 0.2656  | 0.04651 | 0.3947  | Non-genic |
| 20 | rs6133460      | T | C | 0.01562 | 0.2012  | 0.02632 | Non-genic |
| 20 | rs6140124      | C | T | 0       | 0.2353  | 0.1053  | Non-genic |
| 20 | rs708629       | A | G | 0.2656  | 0.6235  | 0.4211  | Non-genic |
| 20 | rs723295       | T | C | 0.2656  | 0.7907  | 0.4211  | Non-genic |
| 20 | rs724940       | G | A | 0.6719  | 0.2188  | 0.4667  | Non-genic |
| 20 | rs727336       | C | T | 0.125   | 0.5529  | 0.2895  | PTPRT     |
| 20 | rs7274170      | T | C | 0.5938  | 0.03614 | 0.3684  | DOK5      |
| 20 | rs911122       | A | G | 0.1562  | 0.5536  | 0.1842  | Non-genic |
| 20 | rs986831       | G | A | 0.09375 | 0.5     | 0.2778  | PTPRT     |
| 20 | rs1048547<br>0 | T | C | 0.01562 | 0.3235  | 0.1842  | Non-genic |
| 20 | rs1048547<br>8 | C | A | 0.125   | 0.6824  | 0.4211  | Non-genic |
| 20 | rs1048556<br>9 | A | G | 0.4688  | 0.1386  | 0.25    | Non-genic |
| 20 | rs1048563<br>4 | A | G | 0.03125 | 0.2176  | 0.1316  | Non-genic |
| 20 | rs1048574<br>9 | A | G | 0.6406  | 0.2083  | 0.4167  | Non-genic |
| 20 | rs1048580<br>5 | G | A | 0.04688 | 0.2917  | 0.3158  | AURKA     |
| 20 | rs1158167      | G | A | 0.5469  | 0.2711  | 0.2632  | Non-genic |
| 20 | rs2143216      | A | G | 0.5625  | 0.2566  | 0.3529  | Non-genic |
| 20 | rs2205824      | G | A | 0.875   | 0.4085  | 0.4167  | Non-genic |
| 20 | rs2268921      | T | G | 0.8906  | 0.4477  | 0.4737  | VAPB      |
| 20 | rs2378132      | G | A | 0.7812  | 0.1628  | 0.4211  | Non-genic |
| 20 | rs2876412      | A | C | 0.5469  | 0.06173 | 0.2     | MACROD2   |
| 20 | rs3848799      | T | C | 0.01562 | 0.5647  | 0.3158  | Non-genic |

|    |                |   |   |         |         |         |           |
|----|----------------|---|---|---------|---------|---------|-----------|
| 20 | rs6029893      | C | T | 0.0625  | 0.3721  | 0.2368  | Non-genic |
| 20 | rs6030208      | A | C | 0.6562  | 0.1446  | 0.3611  | PTPRT     |
| 20 | rs6030447      | A | G | 0.5781  | 0.2706  | 0.1579  | PTPRT     |
| 20 | rs6030634      | G | A | 0.4531  | 0.1607  | 0.2632  | PTPRT     |
| 20 | rs6035046      | T | G | 0.2812  | 0.05233 | 0.05263 | C20orf12  |
| 20 | rs6046326      | C | T | 0.5312  | 0.09884 | 0.2895  | Non-genic |
| 20 | rs6047186      | T | C | 0.04688 | 0.3393  | 0.2778  | Non-genic |
| 20 | rs6055922      | G | A | 0.5     | 0.1706  | 0.1579  | PLCB1     |
| 20 | rs6063858      | G | A | 0.09375 | 0.4583  | 0.3421  | Non-genic |
| 20 | rs6085938      | G | A | 0.1719  | 0.4481  | 0.3438  | Non-genic |
| 20 | rs6113161      | G | A | 0.5781  | 0.2267  | 0.2632  | Non-genic |
| 20 | rs6123551      | A | G | 0.09375 | 0.6176  | 0.3611  | Non-genic |
| 20 | rs6513787      | A | C | 0.6719  | 0.1176  | 0.1579  | PTPRT     |
| 20 | rs719628       | T | C | 0.125   | 0.7616  | 0.4474  | ISM1      |
| 20 | rs721424       | T | G | 0.2344  | 0.5714  | 0.4211  | C20orf26  |
| 20 | rs750702       | G | T | 0       | 0.4647  | 0.2368  | C20orf194 |
| 20 | rs765072       | A | C | 0.2188  | 0.0375  | 0       | Non-genic |
| 20 | rs910858       | G | A | 0.6562  | 0.3198  | 0.3421  | C20orf54  |
| 21 | rs2832478      | T | G | 0.01562 | 0.4345  | 0.1389  | GRIK1     |
| 21 | rs3788010      | A | G | 0.2344  | 0.5244  | 0.2895  | ABCG1     |
| 21 | rs2830066      | T | C | 0.07812 | 0.5235  | 0.3421  | APP       |
| 21 | rs2836489      | C | T | 0.75    | 0.3706  | 0.4211  | ERG       |
| 21 | rs1048295<br>1 | T | C | 0.5156  | 0.1163  | 0.4167  | Non-genic |
| 21 | rs1048304<br>9 | G | A | 0.01562 | 0.2651  | 0.07895 | Non-genic |
| 21 | rs1557365      | C | T | 0.01562 | 0.3272  | 0.1316  | Non-genic |
| 21 | rs1571665      | A | G | 0.01562 | 0.3393  | 0.1316  | Non-genic |
| 21 | rs189457       | C | T | 0.1875  | 0.6481  | 0.3421  | C21orf34  |
| 21 | rs2178817      | A | G | 0.2344  | 0.6471  | 0.3947  | Non-genic |
| 21 | rs218328       | G | A | 0.2969  | 0.04938 | 0.25    | Non-genic |
| 21 | rs2205129      | A | G | 0.6875  | 0.244   | 0.4737  | DSCAM     |
| 21 | rs2211881      | G | A | 0.3125  | 0.8636  | 0.5     | TIAM1     |
| 21 | rs2211984      | G | A | 0.1719  | 0.9529  | 0.5     | Non-genic |
| 21 | rs2248589      | G | T | 0.2188  | 0.7892  | 0.4211  | Non-genic |
| 21 | rs2249039      | A | G | 0.375   | 0.06173 | 0.3421  | Non-genic |
| 21 | rs2254476      | A | G | 0.07812 | 0.5176  | 0.2895  | Non-genic |
| 21 | rs2404001      | C | T | 0.125   | 0.7965  | 0.3529  | USP25     |
| 21 | rs2822665      | G | A | 0.5469  | 0.1429  | 0.4444  | Non-genic |
| 21 | rs2822872      | A | G | 0.03125 | 0.2658  | 0.07895 | Non-genic |
| 21 | rs2822961      | T | C | 0.1562  | 0.5432  | 0.25    | Non-genic |
| 21 | rs2823324      | T | G | 0.5156  | 0.08235 | 0.4737  | Non-genic |
| 21 | rs2823888      | T | C | 0.5     | 0.1012  | 0.3158  | C21orf34  |
| 21 | rs2824502      | C | T | 0.5781  | 0.1     | 0.3947  | Non-genic |
| 21 | rs2825830      | A | G | 0.3438  | 0.6529  | 0.4737  | Non-genic |
| 21 | rs2826728      | A | G | 0.3906  | 0.8588  | 0.4211  | NCAM2     |
| 21 | rs2828155      | A | C | 0.25    | 0.5974  | 0.4211  | Non-genic |
| 21 | rs2830535      | T | C | 0.07812 | 0.5235  | 0.2632  | Non-genic |
| 21 | rs2833087      | T | C | 0.6094  | 0.06471 | 0.4167  | Non-genic |

|    |                |   |   |         |         |         |           |
|----|----------------|---|---|---------|---------|---------|-----------|
| 21 | rs2833103      | A | G | 0.3438  | 0.04878 | 0.2778  | Non-genic |
| 21 | rs2833282      | G | A | 0.3281  | 0.03529 | 0.1842  | TIAM1     |
| 21 | rs2833451      | C | T | 0.04688 | 0.2706  | 0.1053  | Non-genic |
| 21 | rs2834380      | G | A | 0.2031  | 0.5854  | 0.3333  | MRPS6     |
| 21 | rs2837227      | T | C | 0.01562 | 0.3372  | 0.1667  | IGSF5     |
| 21 | rs3787757      | A | G | 0.03125 | 0.244   | 0.07895 | HLCS      |
| 21 | rs723855       | G | A | 0.1562  | 0.5886  | 0.3684  | Non-genic |
| 21 | rs766850       | C | T | 0.125   | 0.7083  | 0.3421  | BACE2     |
| 21 | rs981931       | C | T | 0.07812 | 0.5556  | 0.1579  | Non-genic |
| 21 | rs1474519      | A | G | 0.0625  | 0.4756  | 0.3158  | Non-genic |
| 21 | rs2408971      | G | A | 0.5938  | 0.2176  | 0.3947  | Non-genic |
| 21 | rs2825077      | C | T | 0.7031  | 0.2963  | 0.4167  | Non-genic |
| 21 | rs2825226      | A | G | 0.01562 | 0.3779  | 0.2105  | Non-genic |
| 21 | rs2825724      | C | T | 0.01562 | 0.3294  | 0.1842  | Non-genic |
| 21 | rs2827115      | G | A | 0.0625  | 0.2941  | 0.4211  | Non-genic |
| 21 | rs2829793      | C | T | 0.6094  | 0.1914  | 0.3947  | Non-genic |
| 21 | rs2832643      | T | C | 0       | 0.5523  | 0.3158  | Non-genic |
| 21 | rs2833485      | A | G | 0.5625  | 0.1667  | 0.2222  | SCAF4     |
| 21 | rs2836048      | A | G | 0.8594  | 0.3895  | 0.4737  | KCNJ6     |
| 21 | rs2837108      | T | C | 0.04688 | 0.4302  | 0.2895  | B3GALT5   |
| 21 | rs2838816      | A | G | 0.4062  | 0.06548 | 0.1579  | ADARB1    |
| 21 | rs928285       | G | A | 0.01562 | 0.4419  | 0.3421  | Non-genic |
| 21 | rs928769       | A | G | 0.6719  | 0.3023  | 0.3529  | KCNJ15    |
| 21 | rs967445       | T | G | 0       | 0.3059  | 0.3333  | PDE9A     |
| 22 | rs8140197      | A | G | 0.4516  | 0.1726  | 0.1842  | TUBA8     |
| 22 | rs1048324<br>6 | T | C | 0.01562 | 0.2857  | 0.05263 | Non-genic |
| 22 | rs132556       | C | T | 0.6094  | 0.04819 | 0.4474  | ZNRF3     |
| 22 | rs134704       | C | T | 0.25    | 0.6607  | 0.4412  | Non-genic |
| 22 | rs135938       | A | G | 0.25    | 0.3895  | 0.2105  | Non-genic |
| 22 | rs139897       | A | G | 0.1094  | 0.4593  | 0.2368  | Non-genic |
| 22 | rs139954       | C | T | 0.3438  | 0.02353 | 0.2632  | Non-genic |
| 22 | rs174345       | G | A | 0.2656  | 0.6145  | 0.3158  | CECR2     |
| 22 | rs1885359      | G | A | 0.3125  | 0.7202  | 0.4737  | Non-genic |
| 22 | rs3905396      | A | G | 0.4219  | 0.09036 | 0.3158  | Non-genic |
| 22 | rs4823407      | C | T | 0       | 0.1977  | 0.02632 | PHF21B    |
| 22 | rs5748307      | G | A | 0.4375  | 0.7765  | 0.4474  | Non-genic |
| 22 | rs5995576      | T | C | 0.6562  | 0.1686  | 0.4167  | Non-genic |
| 22 | rs717336       | C | A | 0.25    | 0.5824  | 0.1579  | Non-genic |
| 22 | rs719925       | C | T | 0.1094  | 0.3902  | 0       | SMC1B     |
| 22 | rs7286605      | A | G | 0.03125 | 0.4048  | 0       | FAM118A   |
| 22 | rs7290139      | G | A | 0.03125 | 0.4     | 0       | FAM118A   |
| 22 | rs760531       | C | A | 0.5781  | 0.1824  | 0.4211  | Non-genic |
| 22 | rs9306511      | T | C | 0.5469  | 0.1386  | 0.3947  | Non-genic |
| 22 | rs134709       | C | T | 0.03125 | 0.6728  | 0.4474  | Non-genic |
| 22 | rs2285201      | T | C | 0.1129  | 0.5353  | 0.3421  | MYO18B    |
| 22 | rs431319       | G | A | 0.8125  | 0.3512  | 0.4474  | Non-genic |
| 22 | rs6004913      | A | G | 0.04688 | 0.7209  | 0.3947  | Non-genic |
| 22 | rs9306430      | T | C | 0.7344  | 0.09302 | 0.2895  | Non-genic |





**Table S3 – Gene classification Enrichment analysis of genes encompassing the ancestry informative markers which are closer in allele frequency to the Indian ancestral population.**

|                      |                                                                                           |
|----------------------|-------------------------------------------------------------------------------------------|
| Gene Group 1         | Enrichment Score: 2.380653765217141                                                       |
| OFFICIAL_GENE_SYMBOL | Gene Name                                                                                 |
| KCNIP4               | Kv channel interacting protein 4                                                          |
| KCNH8                | potassium voltage-gated channel, subfamily H (eag-related), member 8                      |
| NALCN                | sodium leak channel, non-selective                                                        |
| KCNK10               | potassium channel, subfamily K, member 10                                                 |
| SLC39A12             | solute carrier family 39 (zinc transporter), member 12                                    |
| SLC9A11              | solute carrier family 9, member 11                                                        |
| TRPM3                | transient receptor potential cation channel, subfamily M, member 3                        |
| KCNJ6                | potassium inwardly-rectifying channel, subfamily J, member 6                              |
| KCNJ15               | potassium inwardly-rectifying channel, subfamily J, member 15                             |
| KCNIP1               | Kv channel interacting protein 1                                                          |
| KCNN3                | potassium intermediate/small conductance calcium-activated channel, subfamily N, member 3 |
| KCNT2                | potassium channel, subfamily T, member 2                                                  |
| KCNQ3                | potassium voltage-gated channel, KQT-like subfamily, member 3                             |
| SLC12A8              | solute carrier family 12 (potassium/chloride transporters), member 8                      |
|                      |                                                                                           |
| Gene Group 2         | Enrichment Score: 2.141087043401848                                                       |
| OFFICIAL_GENE_SYMBOL | Gene Name                                                                                 |
| CDH18                | cadherin 18, type 2                                                                       |
| C9orf135             | chromosome 9 open reading frame 135                                                       |
| ITGAE                | integrin, alpha E (antigen CD103, human mucosal lymphocyte antigen 1; alpha polypeptide)  |
| CDH10                | cadherin 10, type 2 (T2-cadherin)                                                         |
| CDH8                 | cadherin 8, type 2                                                                        |
| PCDH7                | protocadherin 7                                                                           |
| PCDHGA3              | protocadherin gamma subfamily A, 3                                                        |

|          |                                     |
|----------|-------------------------------------|
| C10orf72 | chromosome 10 open reading frame 72 |
| ITGA9    | integrin, alpha 9                   |
| PCDH9    | protocadherin 9                     |
